# Supplementary material for: Threats from Climate Change to Terrestrial Vertebrate Hotspots in Europe
Source: PLOS journal article supplement (doi:10.1371/journal.pone.0074989), 2013-09-16

**Appendix 3: Results obtained by defining species presences with both primary and secondary habitats.**

| <b>Taxon</b>          | <b>Morans' <i>I</i></b> | <b>P-value</b> |
|-----------------------|-------------------------|----------------|
| All mammals           | 0.074                   | 0.0001         |
| Threatened mammals    | 0.212                   | 0.0001         |
| Endemic mammals       | 0.118                   | 0.0001         |
| All birds             | -0.242                  | 0.0001         |
| Threatened birds      | -0.036                  | 0.0001         |
| Endemic birds         | -0.033                  | 0.0001         |
| All reptiles          | 0.253                   | 0.0001         |
| Threatened reptiles   | 0.354                   | 0.0001         |
| Endemic reptiles      | 0.438                   | 0.0001         |
| All amphibians        | 0.004                   | 0.0220         |
| Threatened amphibians | 0.321                   | 0.0001         |
| Endemic amphibians    | 0.145                   | 0.0001         |

Global spatial correlation (as measured with Monran's *I* values) between species richness and risk of exposure to extreme climates.

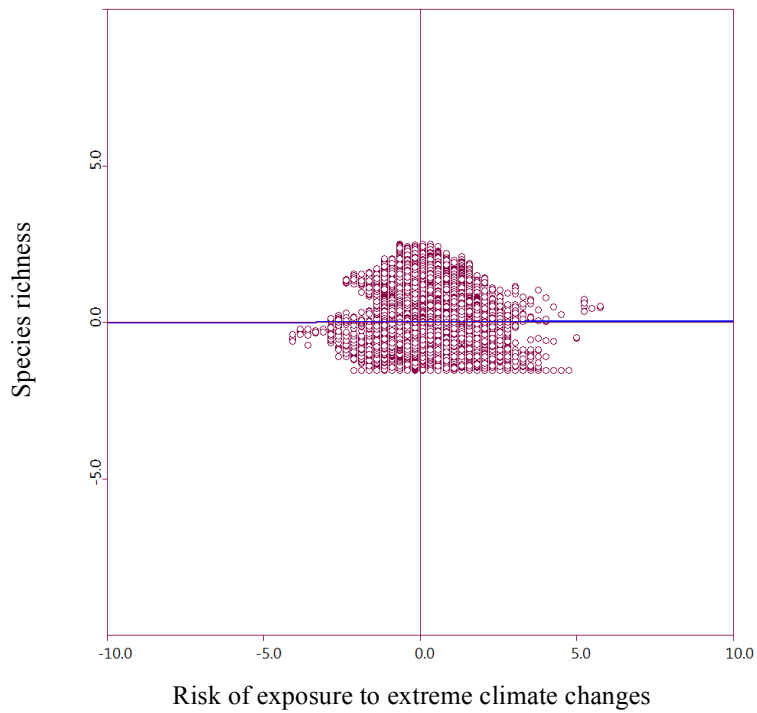

Global spatial correlation (Monran’s *I* value given in the table above) between species richness for amphibians and risk of exposure to extreme climates.

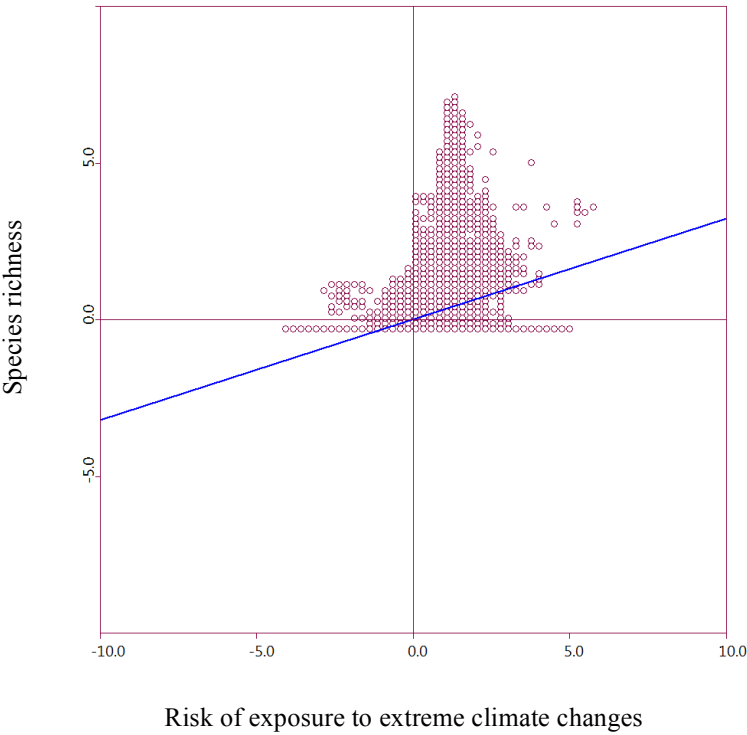

Global spatial correlation (Monran’s *I* value given in the table above) between threatened species richness for amphibians and risk of exposure to extreme climates.

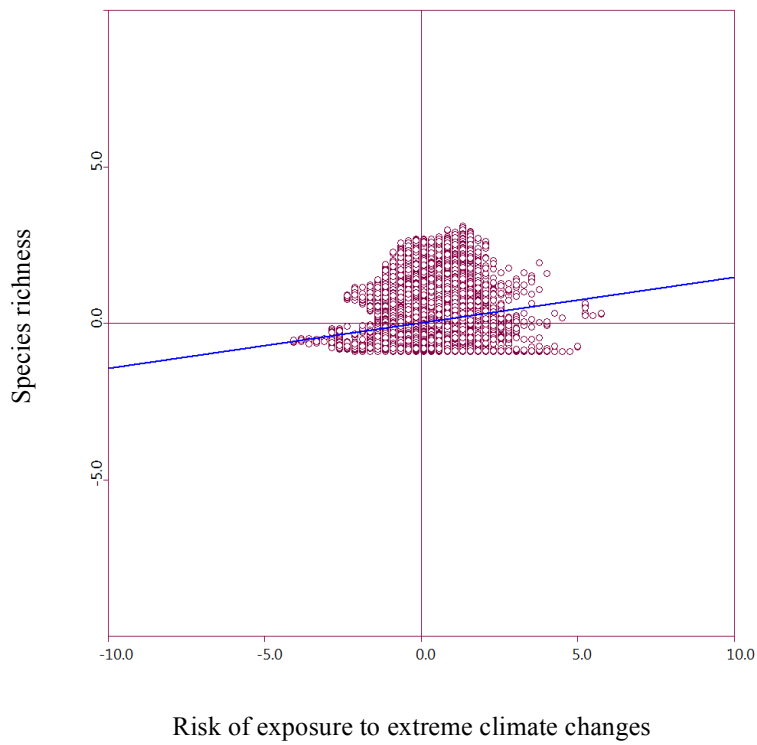

Global spatial correlation (Moran's  $I$  value given in the table above) between endemic species richness for amphibians and risk of exposure to extreme climates.

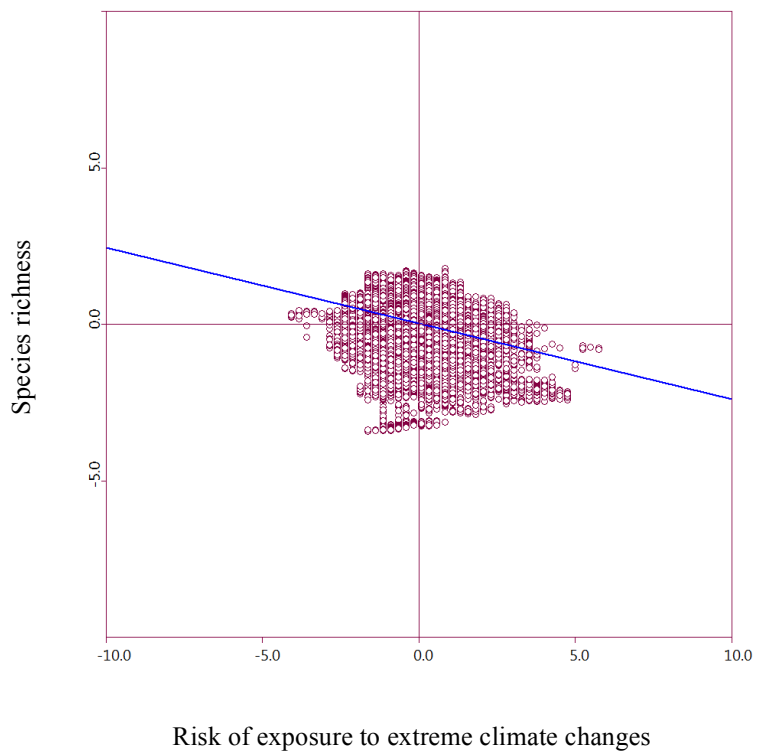

Global spatial correlation (Moran's  $I$  value given in the table above) between species richness for breeding birds and risk of exposure to extreme climates.

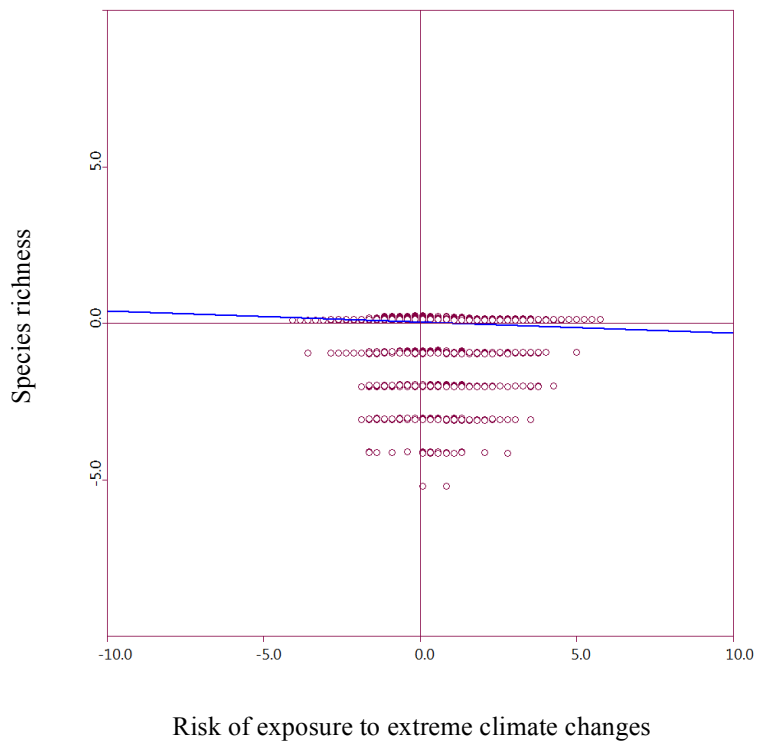

Global spatial correlation (Monran's  $I$  value given in the table above) between threatened species richness for breeding birds and risk of exposure to extreme climates.

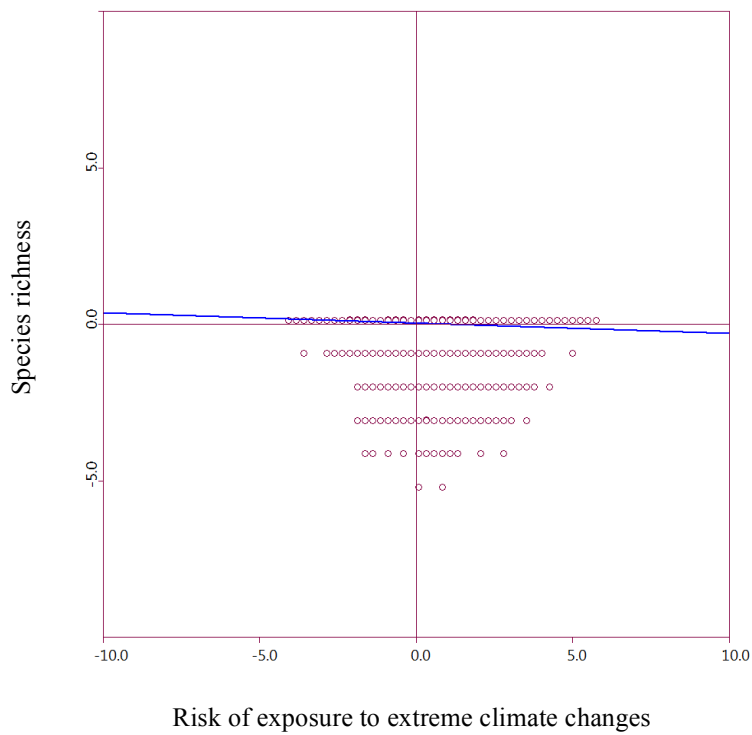

Global spatial correlation (Monran's  $I$  value given in the table above) between endemic species richness for breeding birds and risk of exposure to extreme climates.

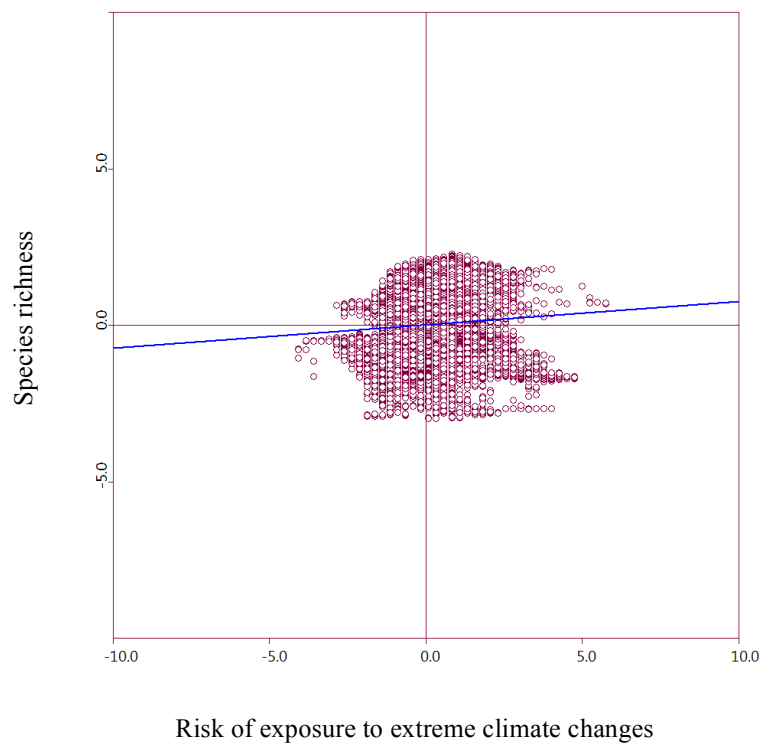

Global spatial correlation (Monran's  $I$  value given in the table above) between species richness for mammals and risk of exposure to extreme climates.

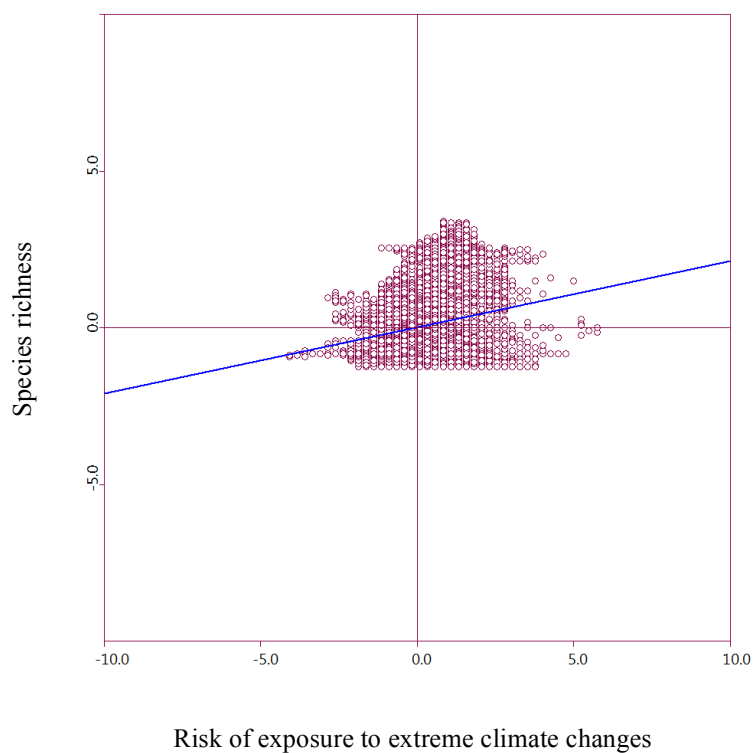

Global spatial correlation (Monran's  $I$  value given in the table above) between threatened species richness for mammals and risk of exposure to extreme climates.

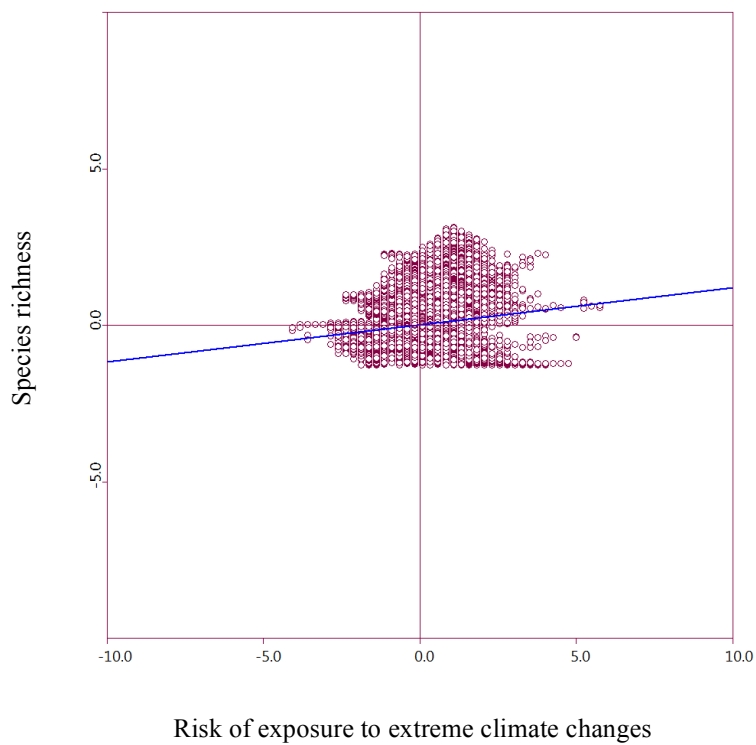

Global spatial correlation (Moran's  $I$  value given in the table above) between endemic species richness for mammals and risk of exposure to extreme climates.

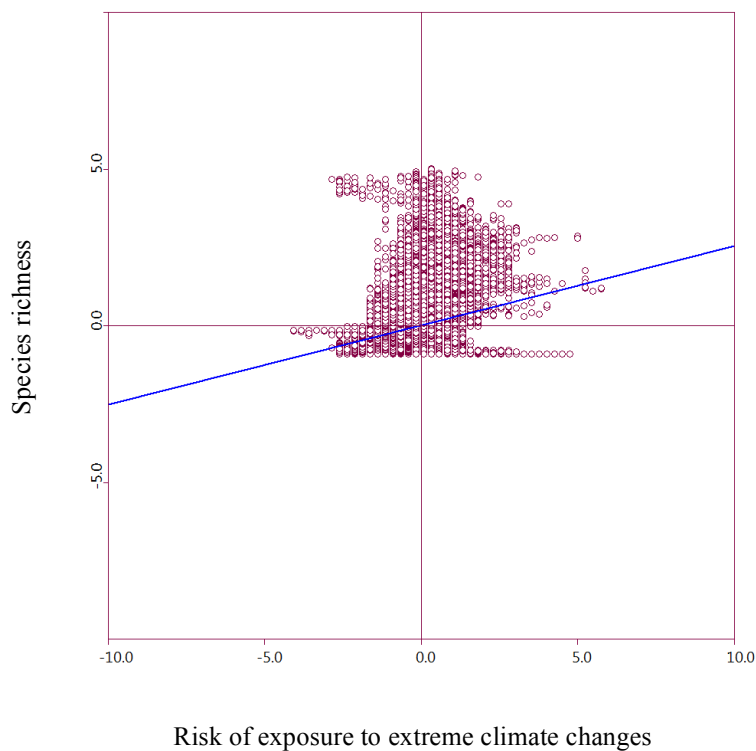

Global spatial correlation (Moran's  $I$  value given in the table above) between species richness for reptiles and risk of exposure to extreme climates.

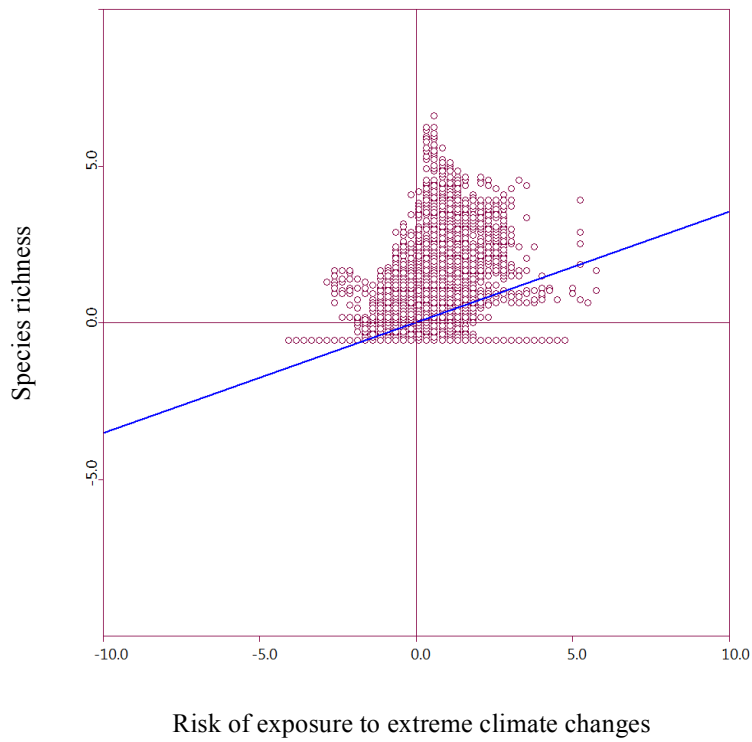

Global spatial correlation (Monran’s *I* value given in the table above) between threatened species richness for reptiles and risk of exposure to extreme climates.

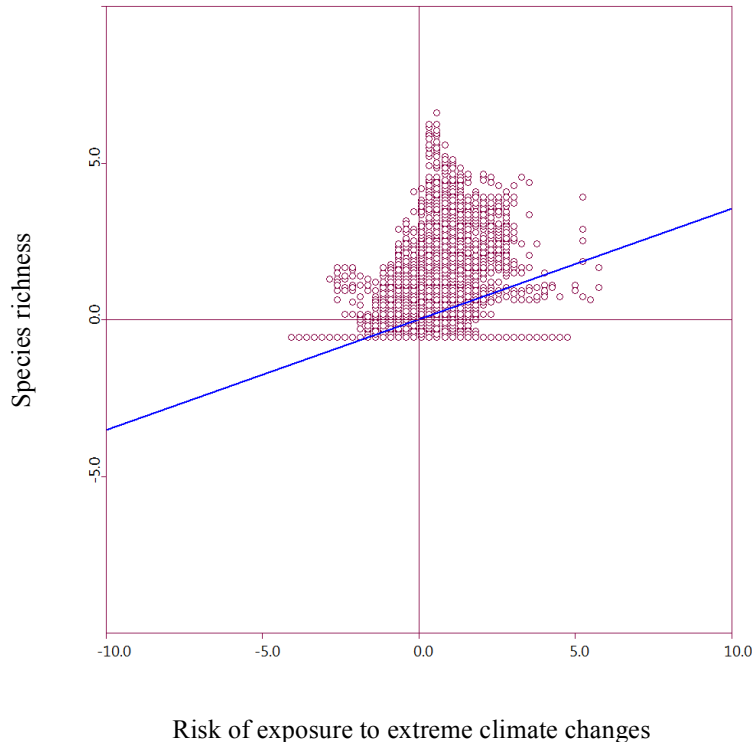

Global spatial correlation (Monran’s *I* value given in the table above) between endemic species richness for reptiles and risk of exposure to extreme climates.

Amphibian species richness (richness values rescaled between 0 and 100; a: all species; b: threatened species as defined by IUCN; c: all species weighted by the percentage of the global distribution occurring inside the study area) and areas with significant overlap ( $p < 0.0001$ ) between risk of exposure to extreme climates and hotspots (top 10% richest cells).

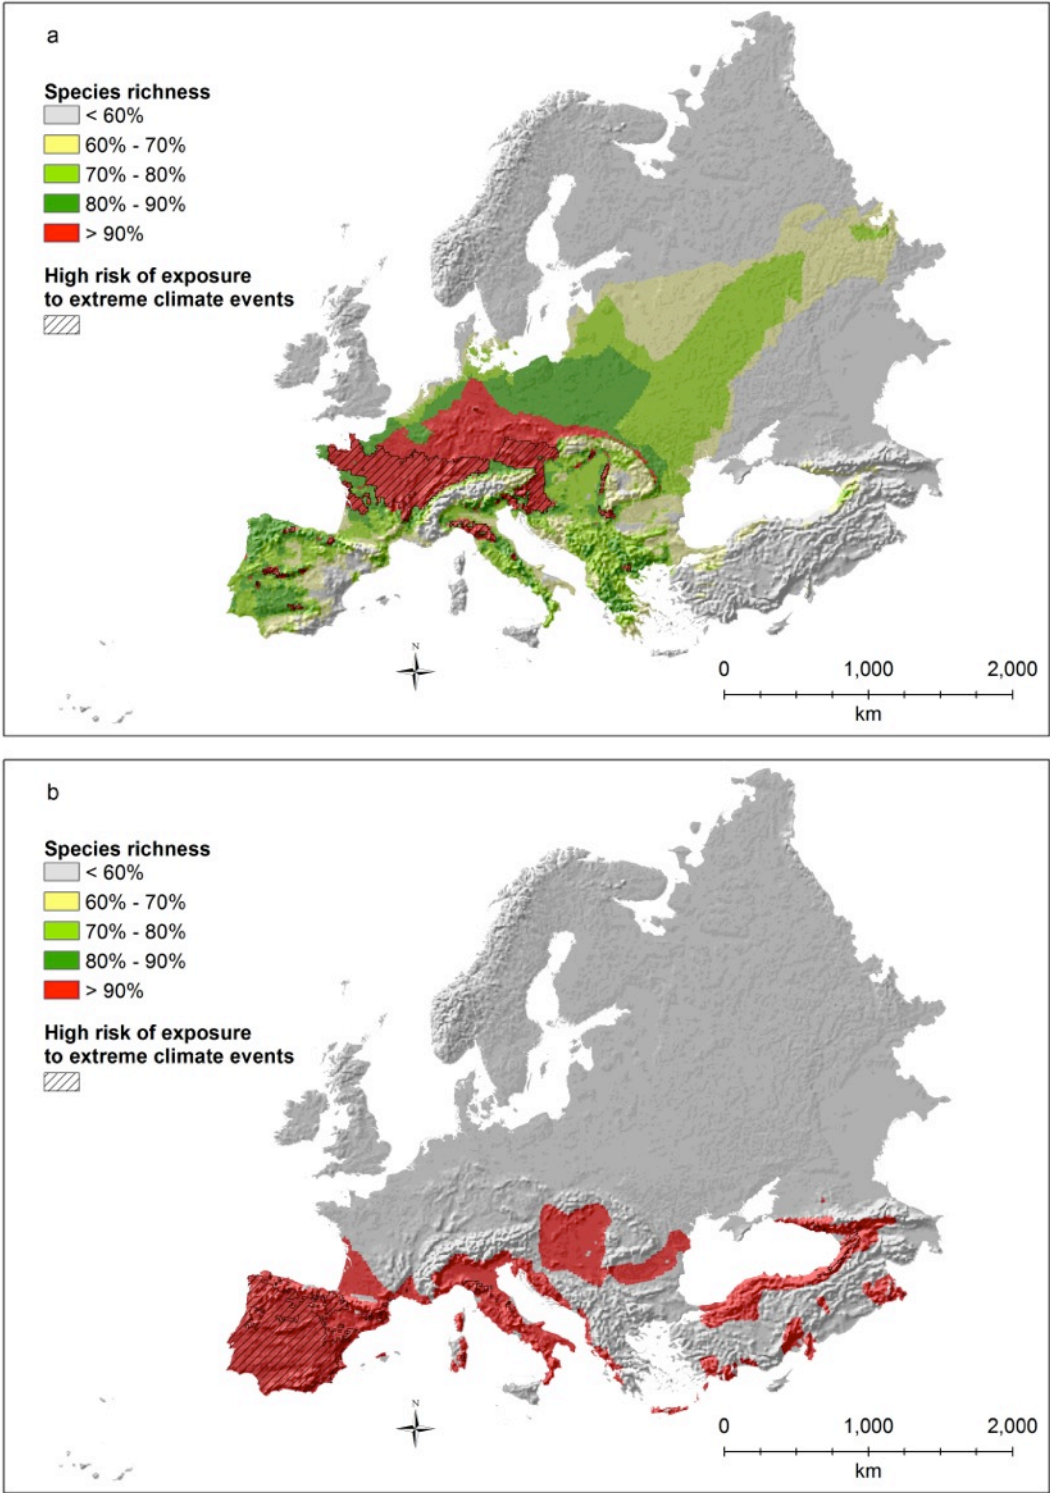



c

**Species richness**

-  < 60%
-  60% - 70%
-  70% - 80%
-  80% - 90%
-  > 90%

**High risk of exposure  
to extreme climate events**

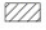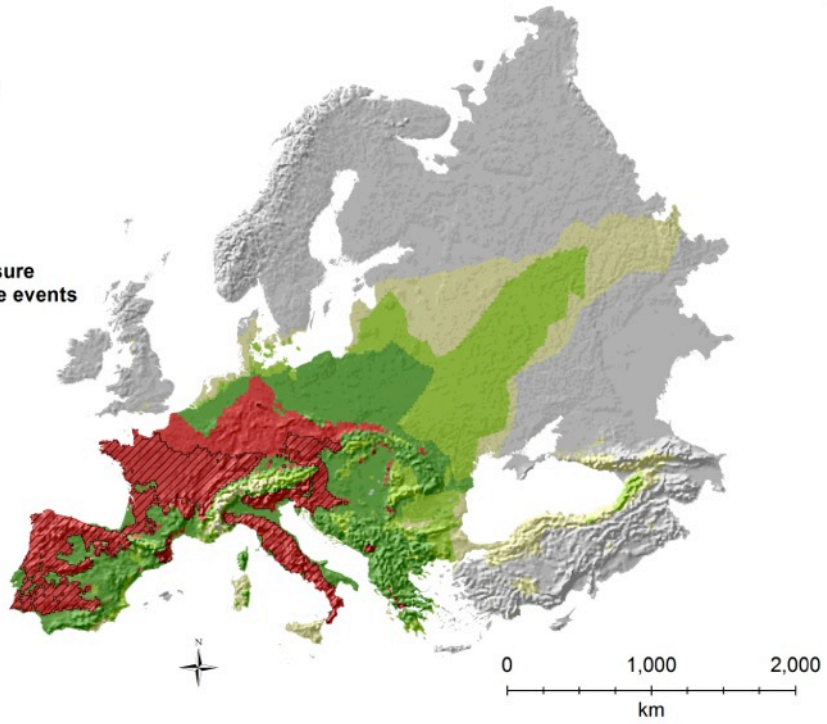

Breeding bird species richness (richness values rescaled between 0 and 100; a: all species; b: threatened species as defined by IUCN; c: all species weighted by the percentage of the global distribution occurring inside the study area) and areas with significant overlap ( $p < 0.0001$ ) between risk of exposure to extreme climates and hotspots (top 10% richest cells).

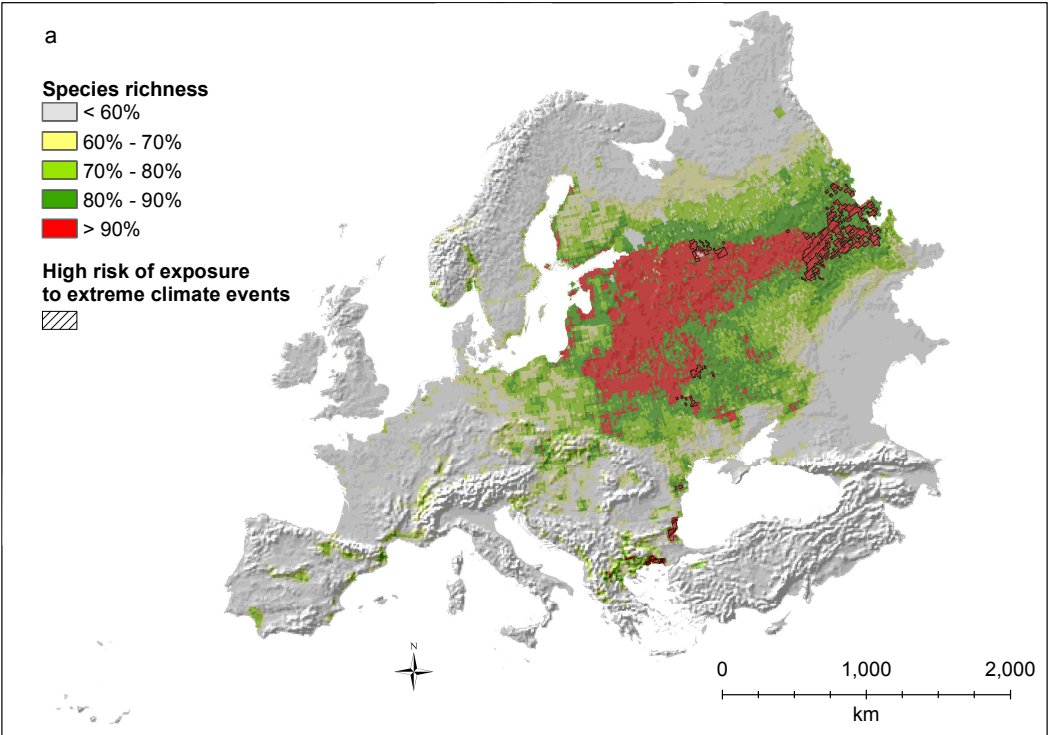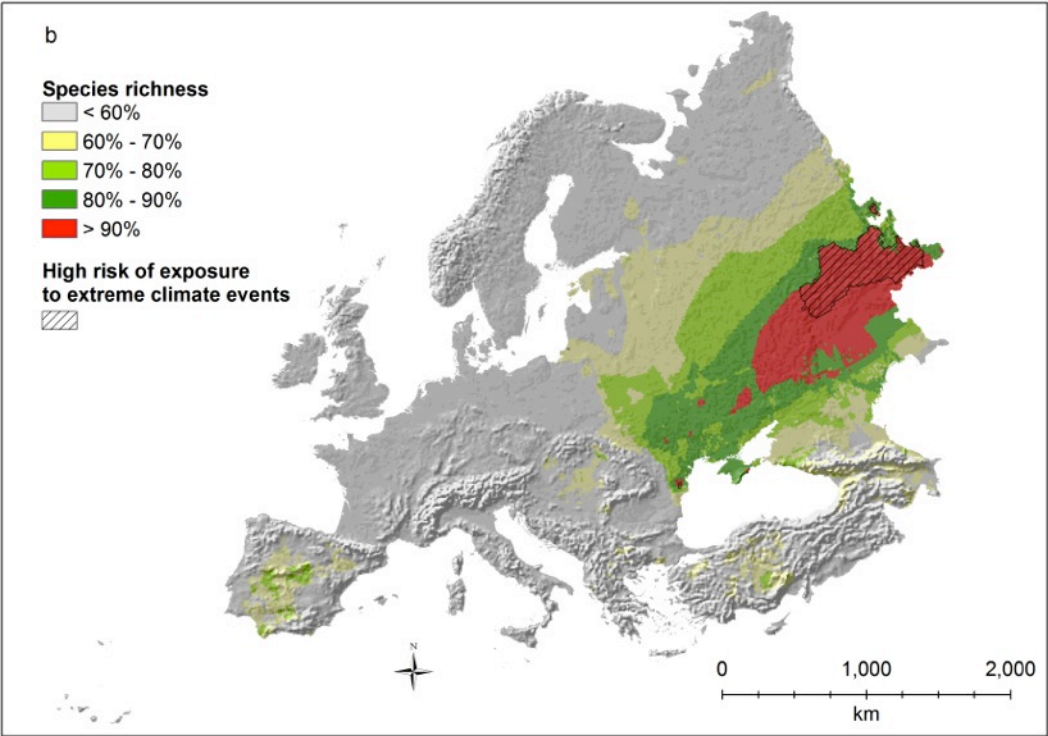

C

**Species richness**

-  < 60%
-  60% - 70%
-  70% - 80%
-  80% - 90%
-  > 90%

**High risk of exposure  
to extreme climate events**

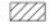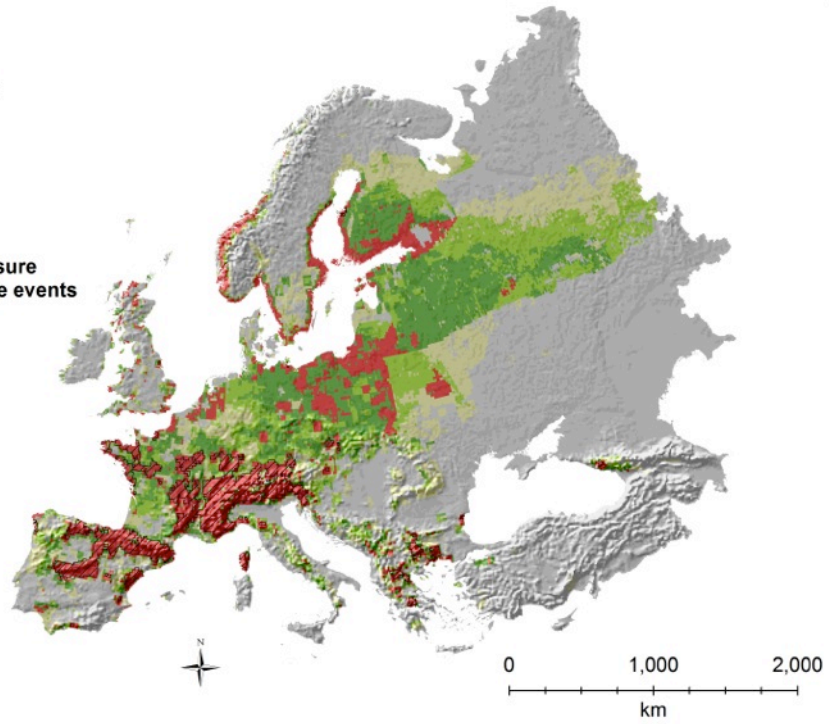

Mammal species richness (richness values rescaled between 0 and 100; a: all species; b: threatened species as defined by IUCN; c: all species weighted by the percentage of the global distribution occurring inside the study area) and areas with significant overlap ( $p < 0.0001$ ) between risk of exposure to extreme climates and hotspots (top 10% richest cells).

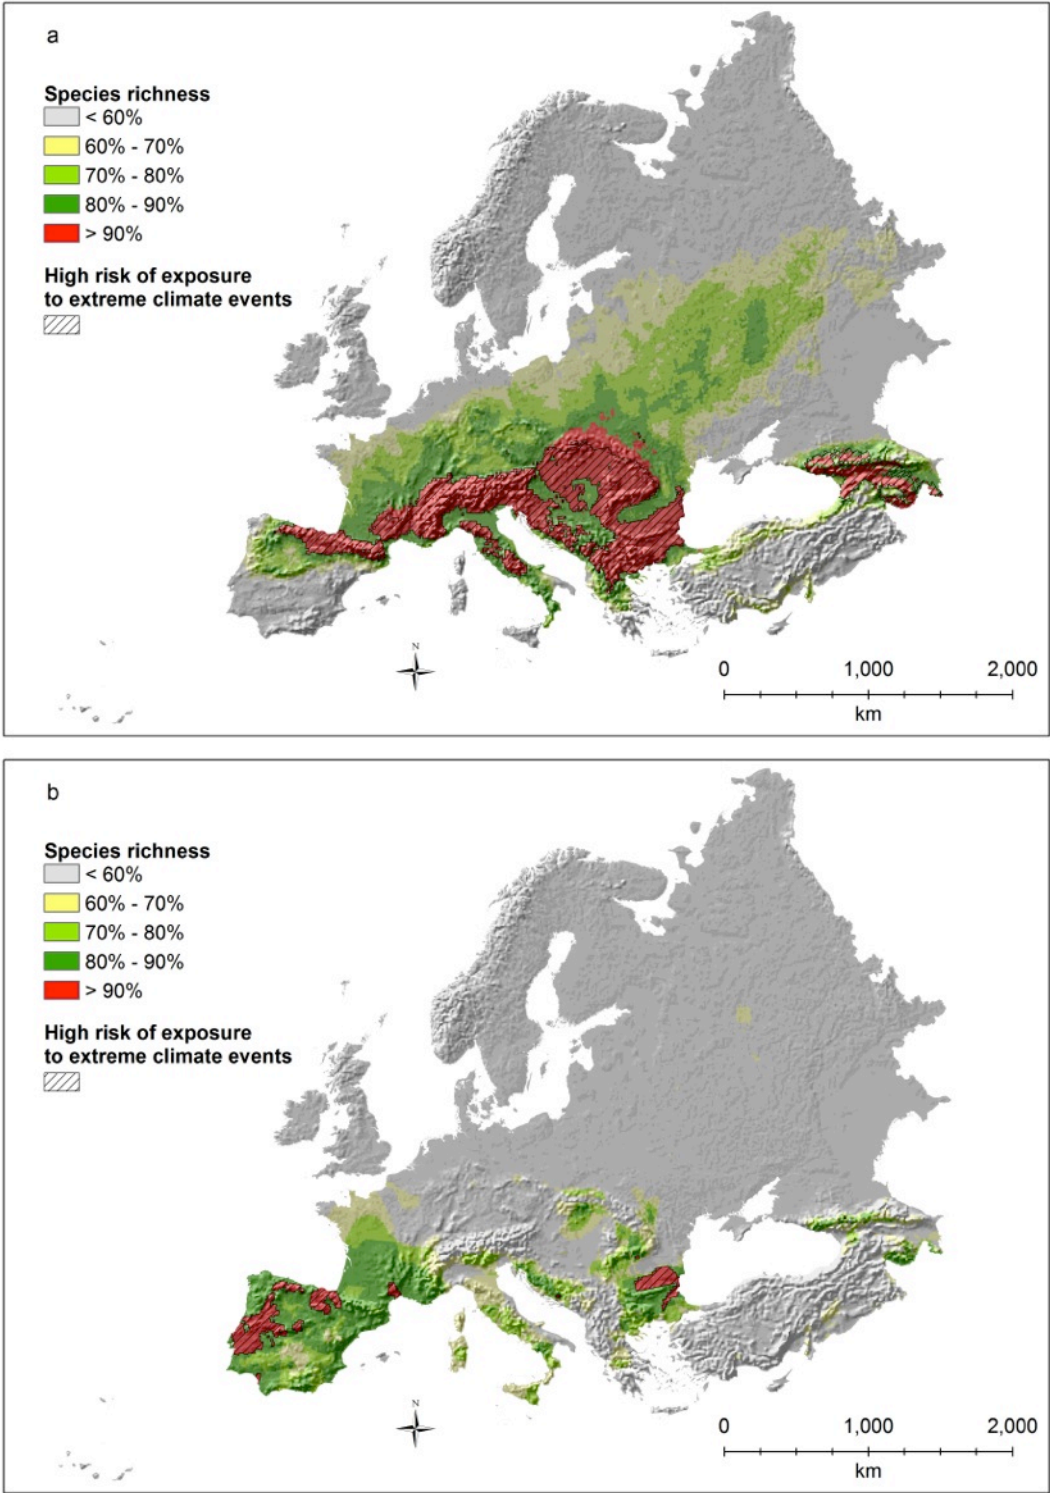

c

**Species richness**

< 60%

60% - 70%

70% - 80%

80% - 90%

> 90%

**High risk of exposure  
to extreme climate events**

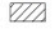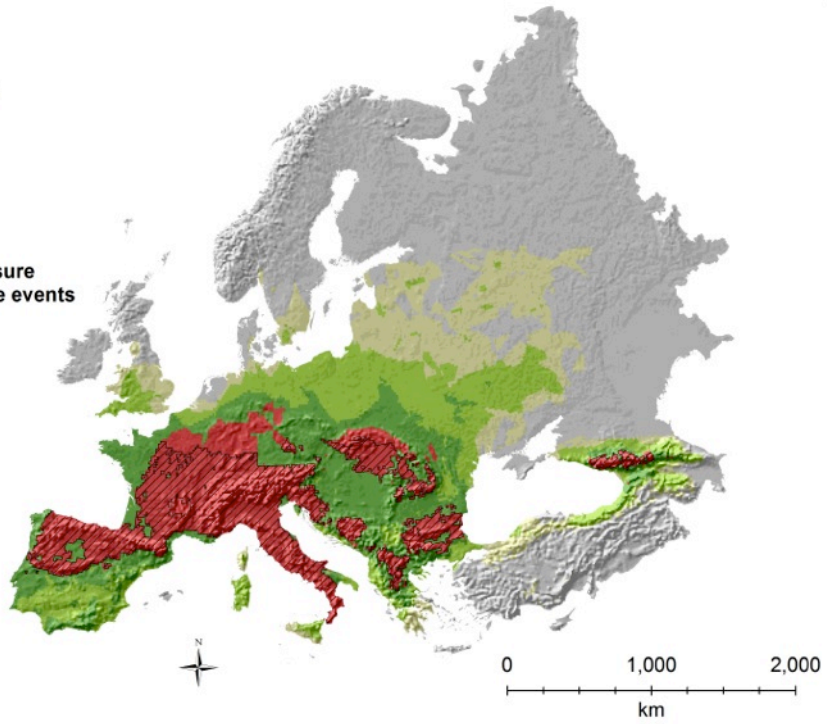



Reptile species richness (richness values rescaled between 0 and 100; a: all species; b: threatened species as defined by IUCN; c: all species weighted by the percentage of the global distribution occurring inside the study area) and areas with significant overlap ( $p < 0.0001$ ) between risk of exposure to extreme climates and hotspots (top 10% richest cells).

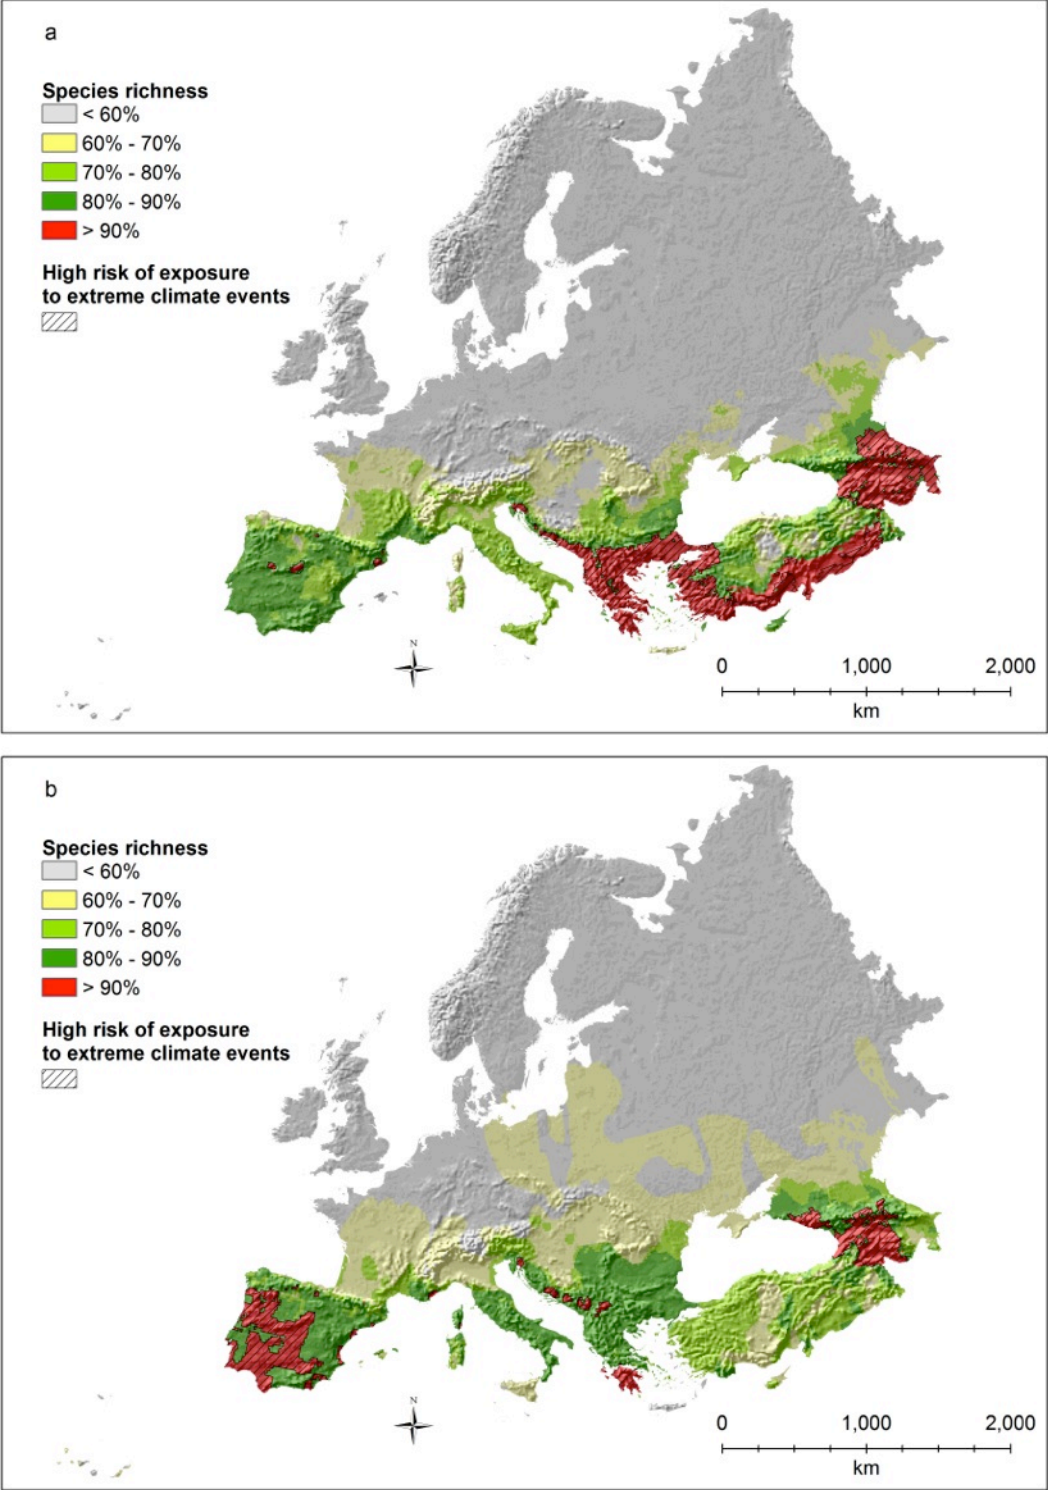

c

**Species richness**

 < 60%

 60% - 70%

 70% - 80%

 80% - 90%

 > 90%

**High risk of exposure  
to extreme climate events**

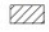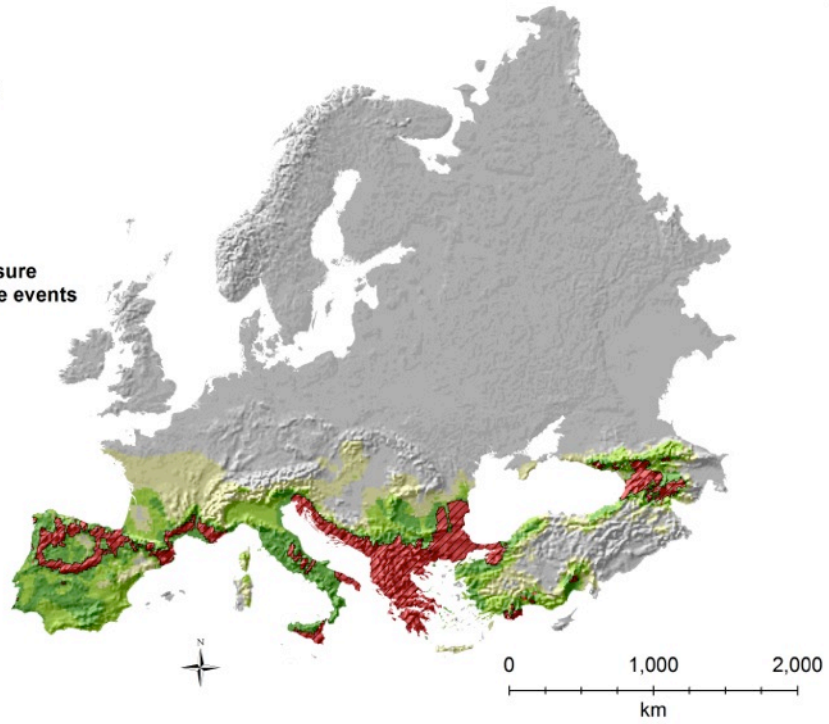

Supplement: S3 (10.1371/journal.pone.0074989.s003) [file journal.pone.0074989.s003]
