# Supplementary material for: Threats from Climate Change to Terrestrial Vertebrate Hotspots in Europe
Source: PLoS One. 2013 Sep 16;8(9):e74989. doi: 10.1371/journal.pone.0074989 (PMC3774810; doi:10.1371/journal.pone.0074989)
Supplement: Appendix S1 — List of species considered in the analysis. (XLSX) [file pone.0074989.s001.xlsx]

## Sheet: Status
Code	Class	Order	Family	Genus	Species	Endemic	IUCN red list	Global extent of occurrence (km2)	European extent of occurrence (km2)	% of the range in Europe
A1	Amphibia	Anura	Alytidae	Alytes	cisternasii	1	Near Threatened	203751	203751	100
A10	Amphibia	Anura	Bufonidae	Bufo	verrucosissimus	0	Near Threatened	53451	43652.5	81.6683
A100	Amphibia	Anura	Bufonidae	Pseudepidalea	balearica	1	Least Concern	226594	226594	100
A101	Amphibia	Anura	Bufonidae	Pseudepidalea	boulengeri	0	Least Concern	1.85221e+06	351.42	0.018973
A102	Amphibia	Anura	Bufonidae	Pseudepidalea	sicula	1	Least Concern	24264.1	24264.1	100
A103	Amphibia	Anura	Bufonidae	Pseudepidalea	variabilis	0	Data Deficient	3.50589e+06	1.25046e+06	35.6675
A104	Amphibia	Caudata	Salamandridae	Triturus	macedonicus	1	Not Evaluated	164330	164330	100
A11	Amphibia	Anura	Bufonidae	Pseudepidalea	viridis	0	Least Concern	4.59342e+06	4.57742e+06	99.6517
A12	Amphibia	Caudata	Salamandridae	Chioglossa	lusitanica	1	Vulnerable	58778.3	58778.3	100
A13	Amphibia	Anura	Alytidae	Discoglossus	galganoi	1	Least Concern	311003	311003	100
A14	Amphibia	Anura	Alytidae	Discoglossus	jeanneae	1	Near Threatened	204349	204349	100
A15	Amphibia	Anura	Alytidae	Discoglossus	montalentii	1	Near Threatened	4174.37	4174.37	100
A16	Amphibia	Anura	Alytidae	Discoglossus	pictus	0	Least Concern	233203	23803.4	10.2072
A17	Amphibia	Anura	Alytidae	Discoglossus	sardus	1	Least Concern	30967.6	30967.6	100
A18	Amphibia	Caudata	Salamandridae	Calotriton	asper	1	Near Threatened	36703.3	36703.3	100
A19	Amphibia	Caudata	Salamandridae	Euproctus	montanus	1	Least Concern	5578.05	5578.05	100
A2	Amphibia	Anura	Alytidae	Alytes	dickhilleni	1	Vulnerable	34436.6	34436.6	100
A20	Amphibia	Caudata	Salamandridae	Euproctus	platycephalus	1	Endangered	6631.28	6631.28	100
A21	Amphibia	Anura	Hylidae	Hyla	arborea	0	Least Concern	3.89418e+06	3.84688e+06	98.7854
A22	Amphibia	Anura	Hylidae	Hyla	intermedia	1	Least Concern	247561	247561	100
A23	Amphibia	Anura	Hylidae	Hyla	meridionalis	0	Least Concern	685469	305775	44.6081
A24	Amphibia	Anura	Hylidae	Hyla	sarda	1	Least Concern	31410.4	31410.4	100
A25	Amphibia	Anura	Hylidae	Hyla	savignyi	0	Least Concern	782065	210455	26.9102
A26	Amphibia	Caudata	Salamandridae	Lyciasalamandra	antalyana	1	Endangered	212.88	212.88	100
A27	Amphibia	Caudata	Salamandridae	Lyciasalamandra	atifi	1	Endangered	1759.44	1759.44	100
A28	Amphibia	Caudata	Salamandridae	Lyciasalamandra	billae	1	Critically Endangered	26.54	26.54	100
A29	Amphibia	Caudata	Salamandridae	Lyciasalamandra	fazilae	1	Endangered	701.27	701.27	100
A3	Amphibia	Anura	Alytidae	Alytes	muletensis	1	Vulnerable	256.62	256.62	100
A30	Amphibia	Caudata	Salamandridae	Lyciasalamandra	flavimembris	1	Endangered	364.99	364.99	100
A31	Amphibia	Caudata	Salamandridae	Lyciasalamandra	helverseni	1	Vulnerable	407.05	407.05	100
A32	Amphibia	Caudata	Salamandridae	Lyciasalamandra	luschani	1	Vulnerable	733.07	733.07	100
A33	Amphibia	Caudata	Salamandridae	Mertensiella	caucasica	1	Vulnerable	33388.2	33388.2	100
A34	Amphibia	Caudata	Salamandridae	Neurergus	crocatus	0	Vulnerable	13445.2	9311.91	69.2581
A35	Amphibia	Caudata	Salamandridae	Neurergus	strauchii	1	Vulnerable	6963.24	6963.24	100
A36	Amphibia	Anura	Pelobatidae	Pelobates	cultripes	1	Near Threatened	522376	522376	100
A37	Amphibia	Anura	Pelobatidae	Pelobates	fuscus	0	Least Concern	4.49466e+06	4.15149e+06	92.3649
A38	Amphibia	Anura	Pelobatidae	Pelobates	syriacus	0	Least Concern	521592	437699	83.9159
A39	Amphibia	Anura	Pelodytidae	Pelodytes	caucasicus	1	Least Concern	74709.7	74709.7	100
A4	Amphibia	Anura	Alytidae	Alytes	obstetricans	1	Least Concern	1.05648e+06	1.05648e+06	100
A40	Amphibia	Anura	Pelodytidae	Pelodytes	ibericus	1	Least Concern	114431	114431	100
A41	Amphibia	Anura	Pelodytidae	Pelodytes	punctatus	1	Least Concern	783571	783571	100
A42	Amphibia	Caudata	Salamandridae	Pleurodeles	waltl	0	Near Threatened	380661	353564	92.8815
A43	Amphibia	Caudata	Proteidae	Proteus	anguinus	1	Vulnerable	35791	35791	100
A44	Amphibia	Anura	Ranidae	Rana	arvalis	0	Least Concern	9.7995e+06	5.48092e+06	55.9306
A45	Amphibia	Anura	Ranidae	Pelophylax	bedriagae	0	Least Concern	287429	215608	75.0126
A46	Amphibia	Anura	Ranidae	Pelophylax	bergeri	1	Least Concern	177932	177932	100
A47	Amphibia	Anura	Ranidae	Pelophylax	cerigensis	1	Critically Endangered	1004.52	1004.52	100
A48	Amphibia	Anura	Ranidae	Pelophylax	cretensis	1	Endangered	3050.72	3050.72	100
A49	Amphibia	Anura	Ranidae	Rana	dalmatina	1	Least Concern	1.92073e+06	1.92073e+06	100
A5	Amphibia	Anura	Bombinatoridae	Bombina	bombina	1	Least Concern	2.98969e+06	2.98969e+06	100
A50	Amphibia	Anura	Ranidae	Pelophylax	epeiroticus	1	Vulnerable	10777	10777	100
A51	Amphibia	Anura	Ranidae	Pelophylax	esculentus	1	Least Concern	2.86727e+06	2.86727e+06	100
A52	Amphibia	Anura	Ranidae	Rana	graeca	1	Least Concern	237492	237492	100
A53	Amphibia	Anura	Ranidae	Pelophylax	grafi	1	Near Threatened	89439.1	89439.1	100
A54	Amphibia	Anura	Ranidae	Pelophylax	hispanicus	1	Least Concern	175496	175496	100
A55	Amphibia	Anura	Ranidae	Rana	iberica	1	Near Threatened	117746	117746	100
A56	Amphibia	Anura	Ranidae	Rana	italica	1	Least Concern	118859	118859	100
A57	Amphibia	Anura	Ranidae	Pelophylax	kurtmuelleri	1	Least Concern	129389	129389	100
A58	Amphibia	Anura	Ranidae	Rana	latastei	1	Vulnerable	68787	68787	100
A59	Amphibia	Anura	Ranidae	Pelophylax	lessonae	1	Least Concern	3.32061e+06	3.32061e+06	100
A6	Amphibia	Anura	Bombinatoridae	Bombina	pachypus	1	Endangered	131874	131874	100
A60	Amphibia	Anura	Ranidae	Rana	macrocnemis	1	Least Concern	647518	647518	100
A61	Amphibia	Anura	Ranidae	Pelophylax	perezi	1	Least Concern	655926	655926	100
A62	Amphibia	Anura	Ranidae	Rana	pyrenaica	1	Endangered	3043.86	3043.86	100
A63	Amphibia	Anura	Ranidae	Pelophylax	ridibundus	0	Least Concern	7.40885e+06	6.12118e+06	82.6198
A64	Amphibia	Anura	Ranidae	Pelophylax	shqipericus	1	Endangered	4848.61	4848.61	100
A65	Amphibia	Anura	Ranidae	Rana	tavasensis	1	Endangered	10644.6	10644.6	100
A66	Amphibia	Anura	Ranidae	Rana	temporaria	0	Least Concern	7.76569e+06	7.0528e+06	90.8199
A67	Amphibia	Caudata	Salamandridae	Salamandra	atra	1	Least Concern	135520	135520	100
A68	Amphibia	Caudata	Salamandridae	Salamandra	corsica	1	Least Concern	4412.98	4412.98	100
A69	Amphibia	Caudata	Salamandridae	Salamandra	infraimmaculata	0	Near Threatened	80948.9	68922.4	85.143
A7	Amphibia	Anura	Bombinatoridae	Bombina	variegata	1	Least Concern	1.2118e+06	1.2118e+06	100
A70	Amphibia	Caudata	Salamandridae	Salamandra	lanzai	1	Vulnerable	2629.96	2629.96	100
A71	Amphibia	Caudata	Salamandridae	Salamandra	salamandra	1	Least Concern	2.21388e+06	2.21388e+06	100
A72	Amphibia	Caudata	Hynobiidae	Salamandrella	keyserlingii	0	Least Concern	1.24595e+07	913810	7.33424
A73	Amphibia	Caudata	Salamandridae	Salamandrina	perspicillata	1	Least Concern	70110.9	70110.9	100
A74	Amphibia	Caudata	Salamandridae	Salamandrina	terdigitata	1	Least Concern	21242.2	21242.2	100
A75	Amphibia	Caudata	Plethodontidae	Speleomantes	ambrosii	1	Near Threatened	2323.48	2323.48	100
A76	Amphibia	Caudata	Plethodontidae	Speleomantes	flavus	1	Vulnerable	565.24	565.24	100
A77	Amphibia	Caudata	Plethodontidae	Atylodes	genei	1	Vulnerable	2352.68	2352.68	100
A78	Amphibia	Caudata	Plethodontidae	Speleomantes	imperialis	1	Near Threatened	3677.31	3677.31	100
A79	Amphibia	Caudata	Plethodontidae	Speleomantes	italicus	1	Near Threatened	27517	27517	100
A8	Amphibia	Anura	Bufonidae	Bufo	bufo	0	Least Concern	1.05282e+07	7.85696e+06	74.628
A80	Amphibia	Caudata	Plethodontidae	Speleomantes	sarrabusensis	1	Vulnerable	50.46	50.46	100
A81	Amphibia	Caudata	Plethodontidae	Speleomantes	strinatii	1	Near Threatened	16303.1	16303.1	100
A82	Amphibia	Caudata	Plethodontidae	Speleomantes	supramontis	1	Endangered	1747.37	1747.37	100
A83	Amphibia	Caudata	Salamandridae	Mesotriton	alpestris	1	Least Concern	1.36905e+06	1.36905e+06	100
A84	Amphibia	Caudata	Salamandridae	Lissotriton	boscai	1	Least Concern	259388	259388	100
A85	Amphibia	Caudata	Salamandridae	Triturus	carnifex	1	Least Concern	330800	330800	100
A86	Amphibia	Caudata	Salamandridae	Triturus	cristatus	0	Least Concern	4.95471e+06	4.63135e+06	93.4738
A87	Amphibia	Caudata	Salamandridae	Triturus	dobrogicus	1	Near Threatened	275524	275524	100
A88	Amphibia	Caudata	Salamandridae	Lissotriton	helveticus	1	Least Concern	1.12349e+06	1.12349e+06	100
A89	Amphibia	Caudata	Salamandridae	Lissotriton	italicus	1	Least Concern	74590.7	74590.7	100
A9	Amphibia	Anura	Bufonidae	Epidalea	calamita	1	Least Concern	2.26924e+06	2.26924e+06	100
A90	Amphibia	Caudata	Salamandridae	Triturus	karelinii	0	Least Concern	448506	388664	86.6573
A91	Amphibia	Caudata	Salamandridae	Triturus	marmoratus	1	Least Concern	495083	495083	100
A92	Amphibia	Caudata	Salamandridae	Lissotriton	montandoni	1	Least Concern	123362	123362	100
A93	Amphibia	Caudata	Salamandridae	Triturus	pygmaeus	1	Near Threatened	184433	184433	100
A94	Amphibia	Caudata	Salamandridae	Ommatotriton	vittatus	0	Least Concern	55856.9	38857.2	69.5655
A95	Amphibia	Caudata	Salamandridae	Lissotriton	vulgaris	0	Least Concern	7.34065e+06	6.56772e+06	89.4705
A96	Amphibia	Anura	Ranidae	Pelophylax	caralitanus	1	Least Concern	22585	22585	100
A97	Amphibia	Caudata	Salamandridae	Ommatotriton	ophryticus	1	Near Threatened	192241	192241	100
A98	Amphibia	Anura	Ranidae	Rana	holtzi	1	Critically Endangered	175.87	175.87	100
A99	Amphibia	Caudata	Salamandridae	Calotriton	arnoldi	1	Critically Endangered	184.23	184.23	100
M1	Mammalia	Rodentia	Muridae	Acomys	cilicius	1	Data Deficient	39.23	39.23	100
M10	Mammalia	Rodentia	Cricetidae	Allocricetulus	eversmanni	0	Least Concern	1.77491e+06	402707	22.6889
M100	Mammalia	Lagomorpha	Leporidae	Lepus	granatensis	1	Least Concern	521127	521127	100
M101	Mammalia	Lagomorpha	Leporidae	Lepus	timidus	0	Least Concern	1.99605e+07	5.0204e+06	25.1516
M102	Mammalia	Lagomorpha	Leporidae	Lepus	tolai	0	Least Concern	7.70917e+06	78481.4	1.01803
M103	Mammalia	Carnivora	Mustelidae	Lutra	lutra	0	Near Threatened	2.51341e+07	7.9011e+06	31.4357
M104	Mammalia	Carnivora	Felidae	Lynx	lynx	0	Least Concern	2.18969e+07	4.59966e+06	21.006
M105	Mammalia	Carnivora	Felidae	Lynx	pardinus	1	Critically Endangered	3158.29	3158.29	100
M107	Mammalia	Rodentia	Sciuridae	Marmota	baibacina	0	Least Concern	609174	3186.13	0.523025
M108	Mammalia	Rodentia	Sciuridae	Marmota	bobak	0	Least Concern	789555	144976	18.3618
M109	Mammalia	Rodentia	Sciuridae	Marmota	marmota	1	Least Concern	184646	184646	100
M11	Mammalia	Carnivora	Canidae	Alopex	lagopus	0	Least Concern	1.65755e+07	1.0018e+06	6.04384
M110	Mammalia	Carnivora	Mustelidae	Martes	foina	0	Least Concern	1.23343e+07	5.8914e+06	47.7643
M111	Mammalia	Carnivora	Mustelidae	Martes	martes	0	Least Concern	9.1007e+06	8.52193e+06	93.6404
M112	Mammalia	Carnivora	Mustelidae	Martes	zibellina	0	Least Concern	6.7145e+06	5063.57	0.0754125
M113	Mammalia	Carnivora	Mustelidae	Meles	leucurus	0	Least Concern	1.6734e+07	1.50885e+06	9.01671
M114	Mammalia	Carnivora	Mustelidae	Meles	meles	0	Least Concern	9.75736e+06	8.6186e+06	88.3292
M115	Mammalia	Rodentia	Muridae	Meriones	crassus	0	Least Concern	6.84779e+06	5566.66	0.0812914
M116	Mammalia	Rodentia	Muridae	Meriones	dahli	0	Endangered	1000.73	948.9	94.8208
M117	Mammalia	Rodentia	Muridae	Meriones	libycus	0	Least Concern	7.84863e+06	98120.2	1.25016
M118	Mammalia	Rodentia	Muridae	Meriones	meridianus	0	Least Concern	6.16887e+06	308170	4.99557
M119	Mammalia	Rodentia	Muridae	Meriones	persicus	0	Least Concern	2.22835e+06	132282	5.93635
M12	Mammalia	Rodentia	Muridae	Apodemus	agrarius	0	Least Concern	1.15261e+07	5.01734e+06	43.5301
M120	Mammalia	Rodentia	Muridae	Meriones	tamariscinus	0	Least Concern	2.56869e+06	338354	13.1723
M121	Mammalia	Rodentia	Muridae	Meriones	tristami	0	Least Concern	903138	458942	50.8163
M122	Mammalia	Rodentia	Muridae	Meriones	vinogradovi	0	Least Concern	304511	29534	9.69882
M123	Mammalia	Rodentia	Cricetidae	Mesocricetus	auratus	0	Vulnerable	4719.96	1631.81	34.5725
M124	Mammalia	Rodentia	Cricetidae	Mesocricetus	brandti	0	Near Threatened	733996	525795	71.6345
M125	Mammalia	Rodentia	Cricetidae	Mesocricetus	newtoni	1	Near Threatened	38771	38771	100
M126	Mammalia	Rodentia	Cricetidae	Mesocricetus	raddei	1	Least Concern	142507	142507	100
M127	Mammalia	Rodentia	Muridae	Micromys	minutus	0	Least Concern	1.82535e+07	7.11822e+06	38.9966
M128	Mammalia	Rodentia	Cricetidae	Microtus	agrestis	0	Least Concern	1.07896e+07	6.74844e+06	62.5458
M129	Mammalia	Rodentia	Cricetidae	Microtus	anatolicus	1	Data Deficient	40312.1	40312.1	100
M13	Mammalia	Rodentia	Muridae	Apodemus	alpicola	1	Least Concern	112233	112233	100
M130	Mammalia	Rodentia	Cricetidae	Microtus	arvalis	0	Least Concern	6.87784e+06	5.31285e+06	77.2459
M131	Mammalia	Rodentia	Cricetidae	Microtus	bavaricus	1	Critically Endangered	2.6	2.6	100
M132	Mammalia	Rodentia	Cricetidae	Microtus	brachycercus	1	Least Concern	50523.3	50523.3	100
M133	Mammalia	Rodentia	Cricetidae	Microtus	cabrerae	1	Near Threatened	113227	113227	100
M134	Mammalia	Rodentia	Cricetidae	Microtus	daghestanicus	1	Least Concern	197294	197294	100
M135	Mammalia	Rodentia	Cricetidae	Microtus	dogramacii	1	Least Concern	22925	22925	100
M136	Mammalia	Rodentia	Cricetidae	Microtus	duodecimcostatus	1	Least Concern	535382	535382	100
M137	Mammalia	Rodentia	Cricetidae	Microtus	felteni	1	Data Deficient	42160.7	42160.7	100
M138	Mammalia	Rodentia	Cricetidae	Microtus	gerbei	1	Least Concern	207656	207656	100
M139	Mammalia	Rodentia	Cricetidae	Microtus	gregalis	0	Least Concern	4.5294e+06	219480	4.84568
M14	Mammalia	Rodentia	Muridae	Apodemus	epimelas	1	Least Concern	175728	175728	100
M140	Mammalia	Rodentia	Cricetidae	Microtus	guentheri	0	Least Concern	643336	598123	92.9721
M141	Mammalia	Rodentia	Cricetidae	Microtus	levis	0	Least Concern	3.85018e+06	3.50415e+06	91.0126
M142	Mammalia	Rodentia	Cricetidae	Microtus	liechtesteini	1	Least Concern	117155	117155	100
M143	Mammalia	Rodentia	Cricetidae	Microtus	lusitanicus	1	Least Concern	254971	254971	100
M144	Mammalia	Rodentia	Cricetidae	Microtus	majori	1	Least Concern	143777	143777	100
M145	Mammalia	Rodentia	Cricetidae	Microtus	middendorffii	0	Least Concern	1.68681e+06	67840.2	4.02182
M146	Mammalia	Rodentia	Cricetidae	Microtus	multiplex	1	Least Concern	125955	125955	100
M147	Mammalia	Rodentia	Cricetidae	Microtus	nasarovi	1	Data Deficient	18529.5	18529.5	100
M148	Mammalia	Rodentia	Cricetidae	Microtus	oeconomus	0	Least Concern	1.85463e+07	4.45083e+06	23.9985
M149	Mammalia	Rodentia	Cricetidae	Microtus	savii	1	Least Concern	185986	185986	100
M15	Mammalia	Rodentia	Muridae	Apodemus	flavicollis	1	Least Concern	6.6526e+06	6.6526e+06	100
M150	Mammalia	Rodentia	Cricetidae	Microtus	schidlovskii	1	Least Concern	5431.47	5431.47	100
M151	Mammalia	Rodentia	Cricetidae	Microtus	socialis	0	Least Concern	1.91318e+06	676812	35.3764
M152	Mammalia	Rodentia	Cricetidae	Microtus	subterraneus	1	Least Concern	2.89331e+06	2.89331e+06	100
M153	Mammalia	Rodentia	Cricetidae	Microtus	tatricus	1	Least Concern	19277.4	19277.4	100
M154	Mammalia	Rodentia	Cricetidae	Microtus	thomasi	1	Least Concern	112120	112120	100
M155	Mammalia	Chiroptera	Vespertilionidae	Miniopterus	fuliginosus	0	Least Concern	1.61181e+07	48879.8	0.303261
M156	Mammalia	Chiroptera	Vespertilionidae	Miniopterus	schreibersi	0	Not Evaluated	3.71277e+06	2.92046e+06	78.6599
M157	Mammalia	Rodentia	Muridae	Mus	cypriacus	1	Least Concern	9318.4	9318.4	100
M158	Mammalia	Rodentia	Muridae	Mus	macedonicus	0	Least Concern	1.38891e+06	1.06723e+06	76.8395
M159	Mammalia	Rodentia	Muridae	Mus	musculus	0	Least Concern	5.22112e+07	1.1008e+07	21.0836
M16	Mammalia	Rodentia	Muridae	Apodemus	hyrcanicus	0	Near Threatened	48731.5	10490.8	21.5278
M160	Mammalia	Rodentia	Muridae	Mus	spicilegus	1	Least Concern	826873	826873	100
M161	Mammalia	Rodentia	Muridae	Mus	spretus	0	Least Concern	965645	523491	54.2116
M162	Mammalia	Rodentia	Gliridae	Muscardinus	avellanarius	1	Least Concern	3.67097e+06	3.67097e+06	100
M163	Mammalia	Carnivora	Mustelidae	Mustela	erminea	0	Least Concern	4.11379e+07	8.40147e+06	20.4227
M164	Mammalia	Carnivora	Mustelidae	Mustela	eversmanii	0	Least Concern	1.32962e+07	3.21586e+06	24.1864
M165	Mammalia	Carnivora	Mustelidae	Mustela	lutreola	1	Critically Endangered	421986	421986	100
M166	Mammalia	Carnivora	Mustelidae	Mustela	nivalis	0	Least Concern	4.36386e+07	1.07915e+07	24.7291
M167	Mammalia	Carnivora	Mustelidae	Mustela	putorius	0	Least Concern	6.03949e+06	6.03949e+06	100
M168	Mammalia	Carnivora	Mustelidae	Mustela	sibirica	0	Least Concern	1.28338e+07	113265	0.882556
M169	Mammalia	Rodentia	Cricetidae	Myodes	glareolus	0	Least Concern	8.66036e+06	7.16013e+06	82.6771
M17	Mammalia	Rodentia	Muridae	Apodemus	mystacinus	0	Least Concern	805591	753796	93.5705
M170	Mammalia	Rodentia	Cricetidae	Myodes	rufocanus	0	Least Concern	1.3074e+07	2.11247e+06	16.1578
M171	Mammalia	Rodentia	Cricetidae	Myodes	rutilus	0	Least Concern	1.84676e+07	2.1042e+06	11.394
M172	Mammalia	Rodentia	Gliridae	Myomimus	roachi	1	Vulnerable	20926.2	20926.2	100
M173	Mammalia	Rodentia	Gliridae	Myomimus	setzeri	0	Data Deficient	162105	27824.2	17.1643
M174	Mammalia	Rodentia	Cricetidae	Myopus	schisticolor	0	Least Concern	1.01773e+07	1.69482e+06	16.6528
M175	Mammalia	Chiroptera	Vespertilionidae	Myotis	alcathoe	1	Data Deficient	1.21407e+06	1.21407e+06	100
M176	Mammalia	Chiroptera	Vespertilionidae	Myotis	aurascens	0	Least Concern	2.61702e+06	2.51512e+06	96.1065
M177	Mammalia	Chiroptera	Vespertilionidae	Myotis	bechsteinii	1	Near Threatened	2.96961e+06	2.96961e+06	100
M178	Mammalia	Chiroptera	Vespertilionidae	Myotis	blythii	0	Least Concern	6.20301e+06	3.2006e+06	51.5975
M179	Mammalia	Chiroptera	Vespertilionidae	Myotis	brandtii	0	Least Concern	7.64765e+06	5.74523e+06	75.1241
M18	Mammalia	Rodentia	Muridae	Apodemus	ponticus	0	Least Concern	347920	330117	94.8831
M180	Mammalia	Chiroptera	Vespertilionidae	Myotis	capaccinii	0	Vulnerable	1.23025e+06	994046	80.8006
M181	Mammalia	Chiroptera	Vespertilionidae	Myotis	dasycneme	0	Near Threatened	5.41194e+06	3.52137e+06	65.0667
M182	Mammalia	Chiroptera	Vespertilionidae	Myotis	daubentonii	0	Least Concern	1.4635e+07	7.44395e+06	50.8638
M183	Mammalia	Chiroptera	Vespertilionidae	Myotis	emarginatus	0	Least Concern	4.47788e+06	3.06294e+06	68.4016
M184	Mammalia	Chiroptera	Vespertilionidae	Myotis	hajastanicus	1	Critically Endangered	2370.92	2370.92	100
M185	Mammalia	Chiroptera	Vespertilionidae	Myotis	myotis	0	Least Concern	3.97497e+06	3.90293e+06	98.1877
M186	Mammalia	Chiroptera	Vespertilionidae	Myotis	mystacinus	0	Least Concern	5.26629e+06	5.20184e+06	98.7763
M187	Mammalia	Chiroptera	Vespertilionidae	Myotis	nattereri	0	Least Concern	5.86466e+06	5.60936e+06	95.6469
M188	Mammalia	Chiroptera	Vespertilionidae	Myotis	nipalensis	0	Least Concern	4.95186e+06	154002	3.10998
M189	Mammalia	Chiroptera	Vespertilionidae	Myotis	punicus	0	Near Threatened	649869	32898.3	5.0623
M19	Mammalia	Rodentia	Muridae	Apodemus	sylvaticus	0	Least Concern	4.99947e+06	4.78241e+06	95.6584
M190	Mammalia	Chiroptera	Vespertilionidae	Myotis	schaubi	0	Data Deficient	119301	52707.2	44.1801
M191	Mammalia	Eulipotyphla	Soricidae	Neomys	anomalus	0	Least Concern	3.39328e+06	3.34537e+06	98.5881
M192	Mammalia	Eulipotyphla	Soricidae	Neomys	fodiens	0	Least Concern	1.31252e+07	7.42924e+06	56.603
M193	Mammalia	Eulipotyphla	Soricidae	Neomys	teres	0	Least Concern	252922	237334	93.837
M195	Mammalia	Chiroptera	Vespertilionidae	Nyctalus	azoreum	1	Endangered	2222.57	2222.57	100
M196	Mammalia	Chiroptera	Vespertilionidae	Nyctalus	lasiopterus	0	Near Threatened	2.90373e+06	2.88087e+06	99.2127
M197	Mammalia	Chiroptera	Vespertilionidae	Nyctalus	leisleri	0	Least Concern	5.16733e+06	5.09569e+06	98.6135
M198	Mammalia	Chiroptera	Vespertilionidae	Nyctalus	noctula	0	Least Concern	8.03095e+06	6.13448e+06	76.3855
M199	Mammalia	Lagomorpha	Ochotonidae	Ochotona	hyperborea	0	Least Concern	1.01073e+07	33703.8	0.333458
M2	Mammalia	Rodentia	Muridae	Acomys	minous	1	Data Deficient	8330.89	8330.89	100
M20	Mammalia	Rodentia	Muridae	Apodemus	uralensis	0	Least Concern	7.22452e+06	3.85334e+06	53.3369
M200	Mammalia	Lagomorpha	Ochotonidae	Ochotona	pusilla	0	Least Concern	1.45885e+06	226476	15.5243
M201	Mammalia	Lagomorpha	Leporidae	Oryctolagus	cuniculus	0	Near Threatened	973186	877953	90.2144
M202	Mammalia	Carnivora	Felidae	Otocolobus	manul	0	Near Threatened	3.35948e+06	3281.01	0.0976641
M203	Mammalia	Cetartiodactyla	Bovidae	Ovis	aries	1	Not Evaluated	41962.6	41962.6	100
M204	Mammalia	Cetartiodactyla	Bovidae	Ovis	orientalis	0	Vulnerable	2.23388e+06	31884.8	1.42733
M205	Mammalia	Carnivora	Felidae	Panthera	pardus	0	Near Threatened	2.22485e+07	133629	0.600619
M206	Mammalia	Chiroptera	Vespertilionidae	Pipistrellus	kuhlii	0	Least Concern	1.07464e+07	3.93105e+06	36.5803
M207	Mammalia	Chiroptera	Vespertilionidae	Pipistrellus	maderensis	1	Endangered	4841.87	4841.87	100
M208	Mammalia	Chiroptera	Vespertilionidae	Pipistrellus	nathusii	1	Least Concern	6.26553e+06	6.26553e+06	100
M209	Mammalia	Chiroptera	Vespertilionidae	Pipistrellus	pipistrellus	0	Least Concern	1.15079e+07	6.58375e+06	57.2107
M21	Mammalia	Rodentia	Muridae	Apodemus	witherbyi	0	Least Concern	1.58353e+06	1.18915e+06	75.0949
M210	Mammalia	Chiroptera	Vespertilionidae	Pipistrellus	pygmaeus	1	Least Concern	2.59911e+06	2.59911e+06	100
M211	Mammalia	Chiroptera	Vespertilionidae	Plecotus	auritus	0	Least Concern	6.62453e+06	6.61057e+06	99.7894
M212	Mammalia	Chiroptera	Vespertilionidae	Plecotus	austriacus	1	Least Concern	3.08838e+06	3.08838e+06	100
M213	Mammalia	Chiroptera	Vespertilionidae	Plecotus	kolombatovici	0	Least Concern	980363	256858	26.2003
M214	Mammalia	Chiroptera	Vespertilionidae	Plecotus	macrobullaris	0	Least Concern	1.0118e+06	854147	84.4188
M215	Mammalia	Chiroptera	Vespertilionidae	Plecotus	sardus	1	Vulnerable	5321.29	5321.29	100
M216	Mammalia	Chiroptera	Vespertilionidae	Plecotus	teneriffae	1	Endangered	3429.58	3429.58	100
M217	Mammalia	Rodentia	Cricetidae	Prometheomys	schaposchnikowi	1	Near Threatened	24796.6	24796.6	100
M218	Mammalia	Rodentia	Sciuridae	Pteromys	volans	0	Least Concern	1.36981e+07	2.20223e+06	16.0769
M219	Mammalia	Rodentia	Dipodidae	Pygeretmus	platyurus	0	Least Concern	926424	95870.7	10.3485
M22	Mammalia	Rodentia	Cricetidae	Arvicola	amphibius	0	Least Concern	1.57119e+07	9.19459e+06	58.5198
M220	Mammalia	Rodentia	Dipodidae	Pygeretmus	pumilio	0	Least Concern	3.4312e+06	570449	16.6254
M221	Mammalia	Cetartiodactyla	Cervidae	Rangifer	tarandus	0	Least Concern	1.81011e+07	790667	4.36806
M224	Mammalia	Chiroptera	Rhinolophidae	Rhinolophus	blasii	0	Least Concern	3.42086e+06	475378	13.8965
M225	Mammalia	Chiroptera	Rhinolophidae	Rhinolophus	euryale	0	Near Threatened	2.99372e+06	2.13471e+06	71.3063
M226	Mammalia	Chiroptera	Rhinolophidae	Rhinolophus	ferrumequinum	0	Least Concern	9.76618e+06	3.46499e+06	35.4795
M227	Mammalia	Chiroptera	Rhinolophidae	Rhinolophus	hipposideros	0	Least Concern	6.26369e+06	4.07797e+06	65.1048
M228	Mammalia	Chiroptera	Rhinolophidae	Rhinolophus	mehelyi	0	Vulnerable	1.98166e+06	957131	48.2994
M229	Mammalia	Rodentia	Muridae	Rhombomys	opimus	0	Least Concern	4.59159e+06	65769.9	1.4324
M23	Mammalia	Rodentia	Cricetidae	Arvicola	sapidus	1	Vulnerable	907154	907154	100
M230	Mammalia	Chiroptera	Pteropodidae	Rousettus	aegyptiacus	0	Least Concern	3.65782e+06	35798.3	0.978679
M231	Mammalia	Cetartiodactyla	Bovidae	Rupicapra	pyrenaica	1	Least Concern	16143.9	16143.9	100
M232	Mammalia	Cetartiodactyla	Bovidae	Rupicapra	rupicapra	1	Least Concern	293395	293395	100
M233	Mammalia	Cetartiodactyla	Bovidae	Saiga	tatarica	0	Critically Endangered	765466	183392	23.9582
M234	Mammalia	Rodentia	Sciuridae	Sciurus	anomalus	0	Least Concern	615480	454170	73.7912
M235	Mammalia	Rodentia	Sciuridae	Sciurus	vulgaris	0	Least Concern	1.97648e+07	7.7355e+06	39.1377
M236	Mammalia	Rodentia	Dipodidae	Sicista	armenica	1	Endangered	100.62	100.62	100
M237	Mammalia	Rodentia	Dipodidae	Sicista	betulina	0	Least Concern	6.7962e+06	3.40904e+06	50.1609
M238	Mammalia	Rodentia	Dipodidae	Sicista	caucasica	1	Vulnerable	6988.88	6988.88	100
M239	Mammalia	Rodentia	Dipodidae	Sicista	kazbegica	1	Endangered	2510.45	2510.45	100
M24	Mammalia	Rodentia	Cricetidae	Arvicola	scherman	1	Least Concern	753447	753447	100
M240	Mammalia	Rodentia	Dipodidae	Sicista	kluchorica	1	Near Threatened	7472.3	7472.3	100
M241	Mammalia	Rodentia	Dipodidae	Sicista	severtzovi	1	Least Concern	349702	349702	100
M242	Mammalia	Rodentia	Dipodidae	Sicista	strandi	1	Least Concern	657768	657768	100
M243	Mammalia	Rodentia	Dipodidae	Sicista	subtilis	0	Least Concern	3.01039e+06	1.4266e+06	47.3893
M244	Mammalia	Eulipotyphla	Soricidae	Sorex	alpinus	1	Near Threatened	493086	493086	100
M245	Mammalia	Eulipotyphla	Soricidae	Sorex	antinorii	1	Data Deficient	290877	290877	100
M246	Mammalia	Eulipotyphla	Soricidae	Sorex	araneus	0	Least Concern	1.32963e+07	7.67766e+06	57.7427
M248	Mammalia	Eulipotyphla	Soricidae	Sorex	caecutiens	0	Least Concern	1.87557e+07	3.6278e+06	19.3424
M249	Mammalia	Eulipotyphla	Soricidae	Sorex	coronatus	1	Least Concern	896720	896720	100
M25	Mammalia	Eulipotyphla	Erinaceidae	Atelerix	algirus	0	Least Concern	736175	72644.2	9.86779
M250	Mammalia	Eulipotyphla	Soricidae	Sorex	granarius	1	Least Concern	71629.9	71629.9	100
M251	Mammalia	Eulipotyphla	Soricidae	Sorex	isodon	0	Least Concern	1.22739e+07	2.15832e+06	17.5846
M252	Mammalia	Eulipotyphla	Soricidae	Sorex	minutissimus	0	Least Concern	1.75695e+07	3.23785e+06	18.4288
M253	Mammalia	Eulipotyphla	Soricidae	Sorex	minutus	0	Least Concern	1.43507e+07	8.70548e+06	60.6626
M254	Mammalia	Eulipotyphla	Soricidae	Sorex	raddei	1	Least Concern	247884	247884	100
M255	Mammalia	Eulipotyphla	Soricidae	Sorex	samniticus	1	Least Concern	160693	160693	100
M256	Mammalia	Eulipotyphla	Soricidae	Sorex	satunini	1	Least Concern	414438	414438	100
M257	Mammalia	Eulipotyphla	Soricidae	Sorex	tundrensis	0	Least Concern	1.60589e+07	462042	2.87717
M258	Mammalia	Eulipotyphla	Soricidae	Sorex	volnuchini	0	Least Concern	436641	431279	98.7718
M259	Mammalia	Rodentia	Spalacidae	Spalax	arenarius	1	Endangered	2299.65	2299.65	100
M26	Mammalia	Chiroptera	Vespertilionidae	Barbastella	barbastellus	1	Near Threatened	3.80778e+06	3.80778e+06	100
M260	Mammalia	Rodentia	Spalacidae	Spalax	ehrenbergi	0	Data Deficient	497830	114005	22.9005
M261	Mammalia	Rodentia	Spalacidae	Spalax	giganteus	0	Vulnerable	54374.3	54374.3	100
M262	Mammalia	Rodentia	Spalacidae	Spalax	graecus	1	Near Threatened	48881.9	48881.9	100
M263	Mammalia	Rodentia	Spalacidae	Spalax	leucodon	1	Data Deficient	531424	531424	100
M264	Mammalia	Rodentia	Spalacidae	Spalax	microphthalmus	1	Least Concern	720454	720454	100
M265	Mammalia	Rodentia	Spalacidae	Spalax	nehringi	1	Data Deficient	577825	577825	100
M266	Mammalia	Rodentia	Spalacidae	Spalax	uralensis	0	Near Threatened	138488	77303.9	55.8198
M267	Mammalia	Rodentia	Spalacidae	Spalax	zemni	1	Vulnerable	155849	155849	100
M268	Mammalia	Rodentia	Sciuridae	Spermophilus	citellus	1	Vulnerable	444862	444862	100
M269	Mammalia	Rodentia	Sciuridae	Spermophilus	fulvus	0	Least Concern	1.84881e+06	375738	20.3233
M27	Mammalia	Chiroptera	Vespertilionidae	Barbastella	leucomelas	0	Least Concern	3.93663e+06	154143	3.91561
M270	Mammalia	Rodentia	Sciuridae	Spermophilus	major	0	Least Concern	628672	347814	55.3253
M271	Mammalia	Rodentia	Sciuridae	Spermophilus	musicus	1	Near Threatened	1547	1547	100
M272	Mammalia	Rodentia	Sciuridae	Spermophilus	pygmaeus	0	Least Concern	1.80912e+06	965196	53.3517
M273	Mammalia	Rodentia	Sciuridae	Spermophilus	suslicus	1	Near Threatened	778721	778721	100
M274	Mammalia	Rodentia	Sciuridae	Spermophilus	taurensis	1	Least Concern	18368.5	18368.5	100
M275	Mammalia	Rodentia	Sciuridae	Spermophilus	xanthoprymnus	1	Least Concern	436938	436938	100
M276	Mammalia	Rodentia	Dipodidae	Stylodipus	telum	0	Least Concern	1.34051e+06	288031	21.4867
M277	Mammalia	Eulipotyphla	Soricidae	Suncus	etruscus	0	Least Concern	3.0555e+06	1.17644e+06	38.5023
M278	Mammalia	Cetartiodactyla	Suidae	Sus	scrofa	0	Least Concern	2.80597e+07	7.19682e+06	25.6482
M279	Mammalia	Chiroptera	Molossidae	Tadarida	teniotis	0	Least Concern	3.75011e+06	2.0066e+06	53.5079
M28	Mammalia	Artiodactyla	Bovidae	Bison	bonasus	1	Vulnerable	4492	4492	100
M280	Mammalia	Eulipotyphla	Talpidae	Talpa	caeca	1	Least Concern	235712	235712	100
M281	Mammalia	Eulipotyphla	Talpidae	Talpa	caucasica	1	Least Concern	165696	165696	100
M282	Mammalia	Eulipotyphla	Talpidae	Talpa	davidiana	0	Data Deficient	98168.8	33258.4	33.8788
M283	Mammalia	Eulipotyphla	Talpidae	Talpa	europaea	0	Least Concern	6.46137e+06	6.03425e+06	93.3897
M284	Mammalia	Eulipotyphla	Talpidae	Talpa	levantis	0	Least Concern	656984	615641	93.7072
M285	Mammalia	Eulipotyphla	Talpidae	Talpa	occidentalis	1	Least Concern	290732	290732	100
M286	Mammalia	Eulipotyphla	Talpidae	Talpa	romana	1	Least Concern	98092.7	98092.7	100
M287	Mammalia	Eulipotyphla	Talpidae	Talpa	stankovici	1	Least Concern	34415.4	34415.4	100
M288	Mammalia	Rodentia	Sciuridae	Tamias	sibiricus	0	Least Concern	1.44654e+07	1.18212e+06	8.17205
M289	Mammalia	Rodentia	Muridae	Tatera	indica	0	Least Concern	4.80636e+06	2630.64	0.0547324
M29	Mammalia	Rodentia	Calomyscidae	Calomyscus	urartensis	0	Least Concern	4823.64	2909.68	60.3213
M290	Mammalia	Carnivora	Ursidae	Ursus	arctos	0	Least Concern	2.77882e+07	3.85446e+06	13.8709
M291	Mammalia	Carnivora	Ursidae	Ursus	maritimus	0	Vulnerable	1.44856e+07	241751	1.66891
M292	Mammalia	Chiroptera	Vespertilionidae	Vespertilio	murinus	0	Least Concern	1.56952e+07	5.51832e+06	35.1593
M293	Mammalia	Carnivora	Mustelidae	Vormela	peregusna	0	Vulnerable	7933923	1.45585e+06	18.3497
M294	Mammalia	Carnivora	Canidae	Vulpes	corsac	0	Least Concern	8.97583e+06	796079	8.86914
M295	Mammalia	Carnivora	Canidae	Vulpes	vulpes	0	Least Concern	7.98393e+07	1.08019e+07	13.5296
M3	Mammalia	Rodentia	Muridae	Acomys	nesiotes	1	Data Deficient	9318.63	9318.63	100
M30	Mammalia	Carnivora	Canidae	Canis	aureus	0	Least Concern	2.71766e+07	1.52054e+06	5.59502
M31	Mammalia	Carnivora	Canidae	Canis	lupus	0	Least Concern	5.11451e+07	7.11533e+06	13.912
M32	Mammalia	Cetartiodactyla	Bovidae	Capra	aegagrus	0	Vulnerable	1.40706e+06	335797	23.8651
M33	Mammalia	Cetartiodactyla	Bovidae	Capra	caucasica	1	Endangered	12307.5	12307.5	100
M34	Mammalia	Cetartiodactyla	Bovidae	Capra	cylindricornis	1	Near Threatened	23195.2	23195.2	100
M36	Mammalia	Cetartiodactyla	Bovidae	Capra	ibex	1	Least Concern	19528.7	19528.7	100
M37	Mammalia	Cetartiodactyla	Bovidae	Capra	pyrenaica	1	Least Concern	56570.3	56570.3	100
M38	Mammalia	Cetartiodactyla	Cervidae	Capreolus	capreolus	0	Least Concern	7.22023e+06	7.17224e+06	99.3353
M39	Mammalia	Cetartiodactyla	Cervidae	Capreolus	pygargus	0	Least Concern	1.19854e+07	905730	7.55695
M4	Mammalia	Cetartiodactyla	Cervidae	Alces	alces	0	Least Concern	7.9402e+06	4.52132e+06	56.9421
M40	Mammalia	Rodentia	Castoridae	Castor	fiber	0	Least Concern	3.56389e+06	3.01476e+06	84.5917
M41	Mammalia	Cetartiodactyla	Cervidae	Cervus	elaphus	0	Least Concern	1.52626e+07	4.66122e+06	30.5401
M42	Mammalia	Rodentia	Cricetidae	Chionomys	gud	1	Least Concern	80455	80455	100
M43	Mammalia	Rodentia	Cricetidae	Chionomys	nivalis	0	Least Concern	891607	778677	87.3342
M44	Mammalia	Rodentia	Cricetidae	Chionomys	roberti	1	Least Concern	75808.7	75808.7	100
M45	Mammalia	Rodentia	Cricetidae	Cricetulus	migratorius	0	Least Concern	7.68254e+06	2.78057e+06	36.1934
M46	Mammalia	Rodentia	Cricetidae	Cricetus	cricetus	0	Least Concern	6.34909e+06	3.58553e+06	56.4731
M47	Mammalia	Eulipotyphla	Soricidae	Crocidura	arispa	1	Least Concern	1166.44	1166.44	100
M48	Mammalia	Eulipotyphla	Soricidae	Crocidura	armenica	1	Data Deficient	871.42	871.42	100
M49	Mammalia	Eulipotyphla	Soricidae	Crocidura	canariensis	1	Endangered	2517.87	2517.87	100
M5	Mammalia	Rodentia	Dipodidae	Allactaga	elater	0	Least Concern	3.24903e+06	357572	11.0055
M50	Mammalia	Eulipotyphla	Soricidae	Crocidura	caspica	0	Data Deficient	12865.6	3870.41	30.0834
M52	Mammalia	Eulipotyphla	Soricidae	Crocidura	leucodon	0	Least Concern	3.93983e+06	3.80141e+06	96.4867
M53	Mammalia	Eulipotyphla	Soricidae	Crocidura	pachyura	0	Least Concern	64495.9	24590.8	38.1278
M54	Mammalia	Eulipotyphla	Soricidae	Crocidura	russula	0	Least Concern	1.92582e+06	1.45961e+06	75.7915
M55	Mammalia	Eulipotyphla	Soricidae	Crocidura	serezkyensis	0	Least Concern	281207	36220.3	12.8803
M56	Mammalia	Eulipotyphla	Soricidae	Crocidura	sicula	1	Least Concern	25639.2	25639.2	100
M57	Mammalia	Eulipotyphla	Soricidae	Crocidura	suaveolens	0	Least Concern	1.26248e+07	5.36792e+06	42.519
M58	Mammalia	Eulipotyphla	Soricidae	Crocidura	zimmermanni	1	Vulnerable	8329.1	8329.1	100
M59	Mammalia	Cetartiodactyla	Cervidae	Dama	dama	1	Least Concern	436051	436051	100
M6	Mammalia	Rodentia	Dipodidae	Allactaga	euphratica	0	Near Threatened	736226	26575.4	3.60968
M60	Mammalia	Eulipotyphla	Talpidae	Desmana	moschata	0	Vulnerable	1.22122e+06	1.17527e+06	96.237
M61	Mammalia	Rodentia	Cricetidae	Dicrostonyx	torquatus	0	Least Concern	2.6007e+06	321287	12.3539
M62	Mammalia	Rodentia	Cricetidae	Dinaromys	bogdanovi	1	Vulnerable	80595	80595	100
M63	Mammalia	Eulipotyphla	Soricidae	Diplomesodon	pulchellum	0	Least Concern	1.82425e+06	150468	8.24821
M64	Mammalia	Rodentia	Dipodidae	Dipus	sagitta	0	Least Concern	3.15871e+06	102958	3.25951
M65	Mammalia	Rodentia	Gliridae	Dryomys	laniger	1	Data Deficient	29838.7	29838.7	100
M66	Mammalia	Rodentia	Gliridae	Dryomys	nitedula	0	Least Concern	5.23265e+06	2736502	52.2967
M67	Mammalia	Rodentia	Gliridae	Eliomys	melanurus	0	Least Concern	149197	3924.27	2.63027
M68	Mammalia	Rodentia	Gliridae	Eliomys	quercinus	1	Near Threatened	2.41598e+06	2.41598e+06	100
M69	Mammalia	Rodentia	Cricetidae	Ellobius	lutescens	0	Least Concern	310661	32955.8	10.6083
M7	Mammalia	Rodentia	Dipodidae	Allactaga	major	0	Least Concern	4.29307e+06	1.93645e+06	45.1063
M70	Mammalia	Rodentia	Cricetidae	Ellobius	talpinus	0	Least Concern	2.98215e+06	1.03675e+06	34.7653
M71	Mammalia	Chiroptera	Vespertilionidae	Eptesicus	bobrinskoi	0	Least Concern	643621	59324.7	9.21733
M72	Mammalia	Chiroptera	Vespertilionidae	Eptesicus	bottae	0	Least Concern	3.89429e+06	217897	5.5953
M73	Mammalia	Chiroptera	Vespertilionidae	Eptesicus	nilsonii	0	Least Concern	1.0395e+07	5.59005e+06	53.7765
M74	Mammalia	Chiroptera	Vespertilionidae	Eptesicus	serotinus	0	Least Concern	1.21294e+07	6.20904e+06	51.1902
M75	Mammalia	Eulipotyphla	Erinaceidae	Erinaceus	concolor	0	Least Concern	1.35011e+06	945612	70.0395
M76	Mammalia	Eulipotyphla	Erinaceidae	Erinaceus	europaeus	1	Least Concern	3.83621e+06	3.83621e+06	100
M77	Mammalia	Eulipotyphla	Erinaceidae	Erinaceus	roumanicus	0	Least Concern	6.05379e+06	4.609e+06	76.1342
M78	Mammalia	Carnivora	Felidae	Felis	chaus	0	Least Concern	6.57516e+06	297261	4.52098
M79	Mammalia	Carnivora	Felidae	Felis	margarita	0	Near Threatened	3.55019e+06	3183.08	0.0896594
M8	Mammalia	Rodentia	Dipodidae	Allactaga	sibirica	0	Least Concern	5.41236e+06	31190.4	0.576281
M80	Mammalia	Carnivora	Felidae	Felis	silvestris	0	Least Concern	2.92309e+07	1.96096e+06	6.70852
M81	Mammalia	Eulipotyphla	Talpidae	Galemys	pyrenaicus	1	Vulnerable	177000	177000	100
M82	Mammalia	Cetartiodactyla	Bovidae	Gazella	subgutturosa	0	Vulnerable	9.78049e+06	88770.5	0.907628
M83	Mammalia	Carnivora	Viverridae	Genetta	genetta	0	Least Concern	1.40398e+07	819874	5.83966
M84	Mammalia	Rodentia	Muridae	Gerbillus	dasyurus	0	Least Concern	1.5473e+06	13019.3	0.841417
M85	Mammalia	Rodentia	Gliridae	Glis	glis	0	Least Concern	3.71349e+06	3.68973e+06	99.3602
M86	Mammalia	Carnivora	Mustelidae	Gulo	gulo	0	Least Concern	3.4936e+07	1.9022e+06	5.44483
M87	Mammalia	Eulipotyphla	Erinaceidae	Hemiechinus	auritus	0	Least Concern	8.49138e+06	810021	9.53933
M88	Mammalia	Carnivora	Herpestidae	Herpestes	ichneumon	0	Least Concern	1.35842e+07	138666	1.02079
M89	Mammalia	Carnivora	Hyaenidea	Hyaena	hyaena	0	Near Threatened	2.36201e+07	240125	1.01661
M9	Mammalia	Rodentia	Dipodidae	Allactaga	williamsi	0	Least Concern	706829	427999	60.552
M90	Mammalia	Chiroptera	Vespertilionidae	Pipistrellus	savii	0	Least Concern	4.34883e+06	2.24799e+06	51.6919
M91	Mammalia	Rodentia	Hystricidae	Hystrix	cristata	0	Least Concern	5.37555e+06	161252	2.99972
M92	Mammalia	Rodentia	Hystricidae	Hystrix	indica	0	Least Concern	7.08606e+06	281118	3.9672
M93	Mammalia	Rodentia	Cricetidae	Lagurus	lagurus	0	Least Concern	4.70851e+06	1.42722e+06	30.3115
M94	Mammalia	Rodentia	Cricetidae	Lemmus	lemmus	1	Least Concern	779857	779857	100
M95	Mammalia	Rodentia	Cricetidae	Lemmus	sibiricus	0	Least Concern	2.15861e+06	367009	17.0021
M96	Mammalia	Lagomorpha	Leporidae	Lepus	capensis	0	Least Concern	1.12595e+07	32697.7	0.290401
M97	Mammalia	Lagomorpha	Leporidae	Lepus	castroviejoi	1	Vulnerable	5816.23	5816.23	100
M98	Mammalia	Lagomorpha	Leporidae	Lepus	corsicanus	1	Vulnerable	54917.2	54917.2	100
M99	Mammalia	Lagomorpha	Leporidae	Lepus	europaeus	0	Least Concern	1.02555e+07	8.15287e+06	79.4974
R1	Reptilia	Squamata	Scincidae	Ablepharus	bivittatus	0	Not Evaluated	587487	65554.2	11.1584
R10	Reptilia	Squamata	Lacertidae	Algyroides	moreoticus	1	Near Threatened	22708	22708	100
R100	Reptilia	Squamata	Viperidae	Gloydius	intermedius	0	Not Evaluated	NO DATA ON GLOBAL EOO	8931.06	NO DATA ON GLOBAL EOO
R101	Reptilia	Squamata	Lacertidae	Hellenolacerta	graeca	1	Near Threatened	21397.2	21397.2	100
R102	Reptilia	Squamata	Gekkonidae	Hemidactylus	turcicus	0	Least Concern	1.27636e+06	884113	69.2682
R103	Reptilia	Squamata	Colubridae	Hemorrhois	hippocrepis	0	Least Concern	804358	340812	42.3707
R104	Reptilia	Squamata	Colubridae	Dolichophis	cypriensis	1	Endangered	2400.89	2400.89	100
R105	Reptilia	Squamata	Colubridae	Hierophis	gemonensis	1	Least Concern	116742	116742	100
R106	Reptilia	Squamata	Colubridae	Hierophis	viridiflavus	1	Least Concern	670769	670769	100
R107	Reptilia	Squamata	Lacertidae	Iberolacerta	aranica	1	Endangered	692.33	692.33	100
R108	Reptilia	Squamata	Lacertidae	Iberolacerta	aurelioi	1	Endangered	768.19	768.19	100
R109	Reptilia	Squamata	Lacertidae	Iberolacerta	bonnali	1	Near Threatened	3288.1	3288.1	100
R11	Reptilia	Squamata	Lacertidae	Algyroides	nigropunctatus	1	Least Concern	66816.5	66816.5	100
R110	Reptilia	Squamata	Lacertidae	Iberolacerta	cyreni	1	Endangered	16809.1	16809.1	100
R111	Reptilia	Squamata	Lacertidae	Iberolacerta	galani	1	Near Threatened	6629.99	6629.99	100
R112	Reptilia	Squamata	Lacertidae	Iberolacerta	horvathi	1	Near Threatened	74599.6	74599.6	100
R113	Reptilia	Squamata	Lacertidae	Iberolacerta	martinezricai	1	Critically Endangered	522.39	522.39	100
R114	Reptilia	Squamata	Lacertidae	Iberolacerta	monticola	1	Vulnerable	23761.4	23761.4	100
R115	Reptilia	Squamata	Lacertidae	Lacerta	agilis	0	Not Evaluated	1.00004e+07	4.31366e+06	43.1351
R116	Reptilia	Squamata	Lacertidae	Anatololacerta	anatolica	1	Least Concern	84729.9	84729.9	100
R117	Reptilia	Squamata	Lacertidae	Lacerta	bilineata	1	Least Concern	875840	875840	100
R118	Reptilia	Squamata	Lacertidae	Apathya	cappadocica	0	Least Concern	267983	207734	77.5175
R119	Reptilia	Squamata	Lacertidae	Phoenicolacerta	cyanisparsa	0	Least Concern	14153.8	13431.3	94.8955
R12	Reptilia	Squamata	Gekkonidae	Alsophylax	pipiens	0	Least Concern	1.74457e+06	99182.4	5.68521
R120	Reptilia	Squamata	Lacertidae	Anatololacerta	danfordi	1	Least Concern	83152.3	83152.3	100
R121	Reptilia	Squamata	Lacertidae	Teira	dugesii	1	Least Concern	3027.38	3027.38	100
R122	Reptilia	Squamata	Lacertidae	Phoenicolacerta	laevis	0	Least Concern	62284.6	47967.7	77.0137
R123	Reptilia	Squamata	Lacertidae	Timon	lepidus	1	Near Threatened	634134	634134	100
R124	Reptilia	Squamata	Lacertidae	Lacerta	media	0	Least Concern	864394	504179	58.3275
R125	Reptilia	Squamata	Lacertidae	Dinarolacerta	mosorensis	1	Vulnerable	25108	25108	100
R126	Reptilia	Squamata	Lacertidae	Dinarolacerta	montenegrina	1	Least Concern	1563.98	1563.98	100
R127	Reptilia	Squamata	Lacertidae	Anatololacerta	oertzeni	1	Least Concern	44602.5	44602.5	100
R128	Reptilia	Squamata	Lacertidae	Dalmatolacerta	oxycephala	1	Least Concern	29097	29097	100
R129	Reptilia	Squamata	Lacertidae	Lacerta	pamphylica	1	Not Evaluated	30906.5	30906.5	100
R13	Reptilia	Squamata	Anguidae	Anguis	cephallonica	1	Near Threatened	22915.3	22915.3	100
R130	Reptilia	Squamata	Lacertidae	Parvilacerta	parva	0	Least Concern	405127	400118	98.7636
R131	Reptilia	Squamata	Lacertidae	Timon	princeps	0	Least Concern	219136	48769.8	22.2555
R132	Reptilia	Squamata	Lacertidae	Lacerta	schreiberi	1	Near Threatened	144087	144087	100
R133	Reptilia	Squamata	Lacertidae	Lacerta	strigata	0	Least Concern	432597	319493	73.8547
R134	Reptilia	Squamata	Lacertidae	Lacerta	trilineata	1	Least Concern	563392	563392	100
R135	Reptilia	Squamata	Lacertidae	Phoenicolacerta	troodica	1	Least Concern	9318.63	9318.63	100
R136	Reptilia	Squamata	Lacertidae	Lacerta	viridis	1	Least Concern	1.24811e+06	1.24811e+06	100
R137	Reptilia	Squamata	Lacertidae	Zootoca	vivipara	0	Least Concern	1.36058e+07	4.69185e+06	34.4842
R138	Reptilia	Squamata	Agamidae	Laudakia	caucasia	0	Not Evaluated	NO DATA ON GLOBAL EOO	210149	NO DATA ON GLOBAL EOO
R139	Reptilia	Squamata	Agamidae	Laudakia	stellio	0	Not Evaluated	NO DATA ON GLOBAL EOO	370958	NO DATA ON GLOBAL EOO
R14	Reptilia	Squamata	Anguidae	Anguis	fragilis	0	Not Evaluated	NO DATA ON GLOBAL EOO	5.98155e+06	NO DATA ON GLOBAL EOO
R140	Reptilia	Squamata	Leptotyphlopidae	Leptotyphlops	macrorhynchus	0	Not Evaluated	NO DATA ON GLOBAL EOO	40621.8	NO DATA ON GLOBAL EOO
R141	Reptilia	Squamata	Scincidae	Trachylepis	aurata	0	Least Concern	410678	232662	56.6532
R142	Reptilia	Squamata	Scincidae	Trachylepis	vittata	0	Least Concern	647348	289905	44.7835
R143	Reptilia	Squamata	Colubridae	Macroprotodon	brevis	0	Near Threatened	435803	236563	54.282
R144	Reptilia	Squamata	Colubridae	Macroprotodon	cucullatus	0	Least Concern	741875	21.95	0.00295872
R145	Reptilia	Squamata	Viperidae	Macrovipera	lebetina	0	Not Evaluated	NO DATA ON GLOBAL EOO	345031	NO DATA ON GLOBAL EOO
R146	Reptilia	Squamata	Viperidae	Macrovipera	schweizeri	1	Endangered	305.59	305.59	100
R147	Reptilia	Squamata	Colubridae	Malpolon	monspessulanus	0	Least Concern	3.5939e+06	1.51758e+06	42.2266
R148	Reptilia	Testudines	Geoemydidae	Mauremys	caspica	0	Not Evaluated	NO DATA ON GLOBAL EOO	448416	NO DATA ON GLOBAL EOO
R149	Reptilia	Testudines	Geoemydidae	Mauremys	leprosa	0	Not Evaluated	NO DATA ON GLOBAL EOO	468039	NO DATA ON GLOBAL EOO
R15	Reptilia	Squamata	Lacertidae	Archaeolacerta	bedriagae	1	Near Threatened	11365	11365	100
R150	Reptilia	Testudines	Geoemydidae	Mauremys	rivulata	0	Not Evaluated	NO DATA ON GLOBAL EOO	502359	NO DATA ON GLOBAL EOO
R151	Reptilia	Squamata	Viperidae	Montivipera	raddei	0	Near Threatened	98781	78756.2	79.7281
R152	Reptilia	Squamata	Viperidae	Montivipera	wagneri	1	Critically Endangered	4492.65	4492.65	100
R153	Reptilia	Squamata	Viperidae	Montivipera	xanthina	1	Least Concern	243094	243094	100
R154	Reptilia	Squamata	Colubridae	Natrix	maura	0	Least Concern	1.75913e+06	968502	55.0557
R155	Reptilia	Squamata	Colubridae	Natrix	natrix	0	Least Concern	NO DATA ON GLOBAL EOO	7.2633e+06	NO DATA ON GLOBAL EOO
R156	Reptilia	Squamata	Colubridae	Natrix	tessellata	0	Least Concern	7.05829e+06	2.70563e+06	38.3326
R157	Reptilia	Squamata	Scincidae	Ophiomorus	punctatissimus	1	Least Concern	41089.8	41089.8	100
R158	Reptilia	Squamata	Lacertidae	Ophisops	elegans	0	Not Evaluated	NO DATA ON GLOBAL EOO	911204	NO DATA ON GLOBAL EOO
R159	Reptilia	Squamata	Agamidae	Phrynocephalus	guttatus	0	Not Evaluated	NO DATA ON GLOBAL EOO	420139	NO DATA ON GLOBAL EOO
R16	Reptilia	Squamata	Gekkonidae	Asaccus	elisae	0	Least Concern	288424	38384.4	13.3084
R160	Reptilia	Squamata	Agamidae	Phrynocephalus	helioscopus	0	Least Concern	5.86111e+06	315814	5.3883
R161	Reptilia	Squamata	Agamidae	Phrynocephalus	mystaceus	0	Not Evaluated	NO DATA ON GLOBAL EOO	350376	NO DATA ON GLOBAL EOO
R162	Reptilia	Squamata	Agamidae	Phrynocephalus	persicus	0	Vulnerable	128211	109760	85.6084
R163	Reptilia	Squamata	Colubridae	Platyceps	najadum	0	Least Concern	1.48005e+06	973795	65.7945
R164	Reptilia	Squamata	Lacertidae	Iranolacerta	brandtii	0	Data Deficient	34309.9	2763.17	8.05357
R165	Reptilia	Squamata	Lacertidae	Podarcis	atrata	1	Not Evaluated	0.44	0.44	100
R166	Reptilia	Squamata	Lacertidae	Podarcis	bocagei	1	Least Concern	60279.5	60279.5	100
R167	Reptilia	Squamata	Lacertidae	Podarcis	carbonelli	1	Endangered	9110.21	9110.21	100
R168	Reptilia	Squamata	Lacertidae	Podarcis	erhardii	1	Least Concern	155439	155439	100
R169	Reptilia	Squamata	Lacertidae	Podarcis	filfolensis	1	Least Concern	353.83	353.83	100
R17	Reptilia	Squamata	Amphisbaenidae	Blanus	cinereus	1	Least Concern	409615	409615	100
R170	Reptilia	Squamata	Lacertidae	Podarcis	gaigeae	1	Vulnerable	240.45	240.45	100
R171	Reptilia	Squamata	Lacertidae	Podarcis	hispanica	1	Least Concern	565496	565496	100
R172	Reptilia	Squamata	Lacertidae	Podarcis	lilfordi	1	Endangered	526.16	526.16	100
R173	Reptilia	Squamata	Lacertidae	Podarcis	melisellensis	1	Least Concern	76585.4	76585.4	100
R174	Reptilia	Squamata	Lacertidae	Podarcis	milensis	1	Vulnerable	238.7	238.7	100
R175	Reptilia	Squamata	Lacertidae	Podarcis	muralis	1	Least Concern	1.86902e+06	1.86902e+06	100
R176	Reptilia	Squamata	Lacertidae	Podarcis	peloponnesiaca	1	Least Concern	21405.6	21405.6	100
R177	Reptilia	Squamata	Lacertidae	Podarcis	pityusensis	1	Near Threatened	741.16	741.16	100
R178	Reptilia	Squamata	Lacertidae	Podarcis	raffonei	1	Critically Endangered	73.65	73.65	100
R179	Reptilia	Squamata	Lacertidae	Podarcis	sicula	1	Least Concern	285046	285046	100
R18	Reptilia	Squamata	Amphisbaenidae	Blanus	strauchi	0	Least Concern	265646	255646	96.2356
R180	Reptilia	Squamata	Lacertidae	Podarcis	taurica	1	Least Concern	531654	531654	100
R181	Reptilia	Squamata	Lacertidae	Podarcis	tiliguerta	1	Least Concern	32819.8	32819.8	100
R182	Reptilia	Squamata	Lacertidae	Podarcis	vaucheri	0	Least Concern	306485	48948	15.9708
R183	Reptilia	Squamata	Lacertidae	Podarcis	wagleriana	1	Least Concern	24665.6	24665.6	100
R185	Reptilia	Squamata	Lacertidae	Psammodromus	hispanicus	1	Least Concern	488303	488303	100
R186	Reptilia	Squamata	Anguidae	Pseudopus	apodus	0	Not Evaluated	NO DATA ON GLOBAL EOO	934978	NO DATA ON GLOBAL EOO
R187	Reptilia	Testudines	Trionychidae	Rafetus	euphraticus	0	Endangered	NO DATA ON GLOBAL EOO	64150.9	NO DATA ON GLOBAL EOO
R188	Reptilia	Squamata	Lacertidae	Darevskia	chlorogaster	0	Least Concern	30096.2	8095.04	26.8972
R189	Reptilia	Squamata	Gekkonidae	Tarentola	angustimentalis	1	Least Concern	2559.73	2559.73	100
R19	Reptilia	Squamata	Scincidae	Chalcides	bedriagai	1	Near Threatened	377930	377930	100
R190	Reptilia	Squamata	Gekkonidae	Tarentola	bischoffi	1	Not Evaluated	2.89	2.89	100
R191	Reptilia	Squamata	Gekkonidae	Tarentola	boettgeri	1	Least Concern	1799.17	1799.17	100
R192	Reptilia	Squamata	Gekkonidae	Tarentola	delalandii	1	Least Concern	2777.24	2777.24	100
R193	Reptilia	Squamata	Gekkonidae	Tarentola	gomorensis	1	Least Concern	375.96	375.96	100
R194	Reptilia	Squamata	Gekkonidae	Tarentola	mauritanica	0	Least Concern	1.69376e+06	763776	45.0935
R195	Reptilia	Squamata	Colubridae	Telescopus	fallax	0	Least Concern	1.2647e+06	747136	59.0763
R196	Reptilia	Testudines	Testudinidae	Testudo	graeca	0	Vulnerable	NO DATA ON GLOBAL EOO	1.25486e+06	NO DATA ON GLOBAL EOO
R197	Reptilia	Testudines	Testudinidae	Testudo	hermanni	1	Near Threatened	675231	675231	100
R198	Reptilia	Testudines	Emydidae	Emys	trinacris	1	Data Deficient	25518.7	25518.7	100
R199	Reptilia	Testudines	Testudinidae	Testudo	marginata	1	Least Concern	106114	106114	100
R2	Reptilia	Squamata	Scincidae	Ablepharus	budaki	0	Least Concern	129898	121643	93.6452
R20	Reptilia	Squamata	Scincidae	Chalcides	bistriatus	1	Not Evaluated	1582.28	1582.28	100
R200	Reptilia	Squamata	Agamidae	Trapelus	agilis	0	Not Evaluated	NO DATA ON GLOBAL EOO	73165	NO DATA ON GLOBAL EOO
R201	Reptilia	Squamata	Agamidae	Trapelus	lessonae	0	Least Concern	1.09521e+06	205560	18.769
R202	Reptilia	Testudines	Trionychidae	Trionyx	triunguis	0	Not Evaluated	NO DATA ON GLOBAL EOO	60820.2	NO DATA ON GLOBAL EOO
R203	Reptilia	Squamata	Typhlopidae	Typhlops	vermicularis	0	Not Evaluated	NO DATA ON GLOBAL EOO	934071	NO DATA ON GLOBAL EOO
R204	Reptilia	Squamata	Varanidae	Varanus	griseus	0	Not Evaluated	NO DATA ON GLOBAL EOO	73208.6	NO DATA ON GLOBAL EOO
R205	Reptilia	Squamata	Viperidae	Montivipera	albizona	1	Endangered	70332.2	70332.2	100
R206	Reptilia	Squamata	Viperidae	Vipera	ammodytes	1	Least Concern	735405	735405	100
R207	Reptilia	Squamata	Viperidae	Vipera	aspis	1	Least Concern	745493	745493	100
R208	Reptilia	Squamata	Viperidae	Vipera	berus	0	Least Concern	NO DATA ON GLOBAL EOO	3.94168e+06	NO DATA ON GLOBAL EOO
R209	Reptilia	Squamata	Viperidae	Montivipera	bulgardaghica	1	Least Concern	25204.6	25204.6	100
R21	Reptilia	Squamata	Scincidae	Chalcides	chalcides	0	Least Concern	240992	205812	85.402
R210	Reptilia	Squamata	Viperidae	Vipera	darevskii	1	Critically Endangered	7536.3	7536.3	100
R211	Reptilia	Squamata	Viperidae	Vipera	dinniki	1	Vulnerable	144438	144438	100
R212	Reptilia	Squamata	Viperidae	Vipera	kaznakovi	1	Endangered	22707.7	22707.7	100
R213	Reptilia	Squamata	Viperidae	Vipera	latastei	0	Vulnerable	593423	459670	77.4607
R214	Reptilia	Squamata	Viperidae	Vipera	nikolskii	1	Not Evaluated	347333	347333	100
R215	Reptilia	Squamata	Viperidae	Vipera	pontica	1	Endangered	949207	949207	100
R216	Reptilia	Squamata	Viperidae	Vipera	transcaucasiana	1	Near Threatened	21977.5	21977.5	100
R217	Reptilia	Squamata	Viperidae	Vipera	seoanei	1	Least Concern	73719.5	73719.5	100
R218	Reptilia	Squamata	Viperidae	Vipera	ursinii	1	Vulnerable	65075.5	65075.5	100
R219	Reptilia	Squamata	Colubridae	Dolichophis	caspius	0	Not Evaluated	NO DATA ON GLOBAL EOO	1.2484e+06	NO DATA ON GLOBAL EOO
R22	Reptilia	Squamata	Scincidae	Chalcides	ocellatus	0	Not Evaluated	NO DATA ON GLOBAL EOO	201781	NO DATA ON GLOBAL EOO
R220	Reptilia	Squamata	Chamaeleonidae	Chamaeleo	africanus	0	Not Evaluated	NO DATA ON GLOBAL EOO	4341.05	NO DATA ON GLOBAL EOO
R221	Reptilia	Squamata	Colubridae	Dolichophis	jugularis	0	Least Concern	655579	206023	31.4261
R222	Reptilia	Squamata	Colubridae	Hemorrhois	nummifer	0	Not Evaluated	NO DATA ON GLOBAL EOO	376723	NO DATA ON GLOBAL EOO
R223	Reptilia	Squamata	Colubridae	Hemorrhois	algirus	0	Not Evaluated	NO DATA ON GLOBAL EOO	329.47	NO DATA ON GLOBAL EOO
R224	Reptilia	Squamata	Colubridae	Hierophis	gyarosensis	1	Not Evaluated	89.59	89.59	100
R225	Reptilia	Squamata	Colubridae	Dolichophis	schmidti	0	Least Concern	829113	468876	56.5515
R226	Reptilia	Squamata	Colubridae	Elaphe	sauromates	0	Not Evaluated	NO DATA ON GLOBAL EOO	1.70912e+06	NO DATA ON GLOBAL EOO
R227	Reptilia	Squamata	Viperidae	Vipera	renardi	0	Not Evaluated	NO DATA ON GLOBAL EOO	1.04356e+06	NO DATA ON GLOBAL EOO
R228	Reptilia	Squamata	Gekkonidae	Stenodactylus	grandiceps	0	Not Evaluated	NO DATA ON GLOBAL EOO	4071.48	NO DATA ON GLOBAL EOO
R229	Reptilia	Squamata	Lacertidae	Acanthodactylus	boskianus	0	Not Evaluated	NO DATA ON GLOBAL EOO	45935.1	NO DATA ON GLOBAL EOO
R23	Reptilia	Squamata	Scincidae	Chalcides	sexlineatus	1	Least Concern	1013.49	1013.49	100
R230	Reptilia	Squamata	Colubridae	Hemorrhois	ravergieri	0	Not Evaluated	NO DATA ON GLOBAL EOO	335828	NO DATA ON GLOBAL EOO
R231	Reptilia	Squamata	Colubridae	Platyceps	ventromaculatus	0	Not Evaluated	NO DATA ON GLOBAL EOO	8188.68	NO DATA ON GLOBAL EOO
R232	Reptilia	Squamata	Colubridae	Pseudocyclophis	persicus	0	Not Evaluated	NO DATA ON GLOBAL EOO	89097.6	NO DATA ON GLOBAL EOO
R233	Reptilia	Squamata	Colubridae	Rhynchocalamus	melanocephalus	0	Least Concern	135283	106013	78.3637
R234	Reptilia	Squamata	Colubridae	Spalerosophis	diadema	0	Not Evaluated	NO DATA ON GLOBAL EOO	34355.5	NO DATA ON GLOBAL EOO
R235	Reptilia	Squamata	Gekkonidae	Eublepharis	angramainyu	0	Data Deficient	67836.5	16522.1	24.3557
R236	Reptilia	Squamata	Scincidae	Trachylepis	septemtaeniata	0	Not Evaluated	NO DATA ON GLOBAL EOO	157922	NO DATA ON GLOBAL EOO
R237	Reptilia	Squamata	Scincidae	Acanthodactylus	harranensis	1	Critically Endangered	1694.22	1694.22	100
R238	Reptilia	Squamata	Scincidae	Acanthodactylus	grandis	0	Not Evaluated	NO DATA ON GLOBAL EOO	7003.42	NO DATA ON GLOBAL EOO
R239	Reptilia	Squamata	Lacertidae	Eremias	persica	0	Not Evaluated	NO DATA ON GLOBAL EOO	4892.73	NO DATA ON GLOBAL EOO
R24	Reptilia	Squamata	Scincidae	Chalcides	simonyi	1	Endangered	615.87	615.87	100
R240	Reptilia	Squamata	Viperidae	Vipera	eriwanensis	1	Vulnerable	60714.9	60714.9	100
R241	Reptilia	Squamata	Colubridae	Zamenis	persica	0	Data Deficient	62371.9	8816.77	14.1358
R242	Reptilia	Squamata	Viperidae	Vipera	lotievi	1	Near Threatened	84537.7	84537.7	100
R245	Reptilia	Squamata	Lacertidae	Mesalina	brevirostris	0	Least Concern	651683	14162.1	2.17315
R246	Reptilia	Squamata	Colubridae	Telescopus	nigriceps	0	Least Concern	135125	11719.9	8.67341
R247	Reptilia	Squamata	Viperidae	Pseudocerastes	persicus	0	Least Concern	4.49258e+06	8847.95	0.196946
R248	Reptilia	Squamata	Typhlopoidea	Rhinotyphlops	episcopus	1	Data Deficient	1421.16	1421.16	100
R249	Reptilia	Squamata	Colubridae	Rhynchocalamus	barani	1	Data Deficient	13417.7	13417.7	100
R25	Reptilia	Squamata	Scincidae	Chalcides	striatus	1	Least Concern	524186	524186	100
R250	Reptilia	Squamata	Colubridae	Rhynchocalamus	melanocephalus	0	Least Concern	135283	107360	79.3594
R251	Reptilia	Squamata	Colubridae	Macroprotodon	mauritanicus	0	Not Evaluated	NO DATA ON GLOBAL EOO	3991.48	NO DATA ON GLOBAL EOO
R26	Reptilia	Squamata	Scincidae	Chalcides	viridanus	1	Least Concern	2130.76	2130.76	100
R27	Reptilia	Squamata	Chamaeleonidae	Chamaeleo	chamaeleon	0	Not Evaluated	NO DATA ON GLOBAL EOO	156210	NO DATA ON GLOBAL EOO
R28	Reptilia	Squamata	Colubridae	Coronella	austriaca	0	Not Evaluated	5.06623e+06	4.95682e+06	97.8404
R29	Reptilia	Squamata	Colubridae	Coronella	girondica	0	Least Concern	1.20569e+06	799986	66.351
R3	Reptilia	Squamata	Scincidae	Ablepharus	chernovi	0	Least Concern	279957	276109	98.6253
R30	Reptilia	Squamata	Gekkonidae	Cyrtopodion	caspium	0	Least Concern	1.76416e+06	118689	6.7278
R31	Reptilia	Squamata	Gekkonidae	Cyrtopodion	heterocercum	0	Least Concern	95531.3	71867.6	75.2294
R32	Reptilia	Squamata	Gekkonidae	Cyrtopodion	kotschyi	0	Least Concern	659796	656438	99.4911
R33	Reptilia	Squamata	Gekkonidae	Cyrtopodion	russowii	0	Least Concern	1.3365e+06	79767.1	5.96837
R34	Reptilia	Squamata	Gekkonidae	Cyrtopodion	scabrum	0	Least Concern	2.80389e+06	34435	1.22811
R35	Reptilia	Squamata	Lacertidae	Darevskia	alpina	1	Vulnerable	36666.9	36666.9	100
R36	Reptilia	Squamata	Lacertidae	Darevskia	armeniaca	1	Least Concern	86495.7	86495.7	100
R37	Reptilia	Squamata	Lacertidae	Darevskia	bendimahiensis	1	Endangered	7202.47	7202.47	100
R38	Reptilia	Squamata	Lacertidae	Darevskia	brauneri	1	Least Concern	46442.7	46442.7	100
R39	Reptilia	Squamata	Lacertidae	Darevskia	caucasica	1	Least Concern	171673	171673	100
R4	Reptilia	Squamata	Scincidae	Ablepharus	kitaibelii	1	Least Concern	678962	678962	100
R40	Reptilia	Squamata	Lacertidae	Darevskia	clarkorum	1	Endangered	17634.1	17634.1	100
R41	Reptilia	Squamata	Lacertidae	Darevskia	daghestanica	1	Least Concern	76509.5	76509.5	100
R42	Reptilia	Squamata	Lacertidae	Darevskia	dahli	1	Near Threatened	86526.6	86526.6	100
R43	Reptilia	Squamata	Lacertidae	Darevskia	derjugini	1	Near Threatened	117813	117813	100
R44	Reptilia	Squamata	Lacertidae	Darevskia	dryada	1	Near Threatened	4400.03	4400.03	100
R45	Reptilia	Squamata	Lacertidae	Darevskia	lindholmi	1	Not Evaluated	22493.9	22493.9	100
R46	Reptilia	Squamata	Lacertidae	Darevskia	mixta	1	Near Threatened	36722.1	36722.1	100
R47	Reptilia	Squamata	Lacertidae	Darevskia	nairensis	1	Not Evaluated	75294.1	75294.1	100
R48	Reptilia	Squamata	Lacertidae	Darevskia	parvula	1	Least Concern	66332.8	66332.8	100
R49	Reptilia	Squamata	Lacertidae	Darevskia	portschinskii	1	Least Concern	55431.6	55431.6	100
R5	Reptilia	Squamata	Scincidae	Ablepharus	pannonicus	0	Not Evaluated	NO DATA ON GLOBAL EOO	161706	NO DATA ON GLOBAL EOO
R50	Reptilia	Squamata	Lacertidae	Darevskia	praticola	0	Near Threatened	471655	464820	98.5509
R51	Reptilia	Squamata	Lacertidae	Darevskia	raddei	0	Least Concern	174954	134021	76.6036
R52	Reptilia	Squamata	Lacertidae	Darevskia	rostombekovi	1	Endangered	39685.9	39685.9	100
R53	Reptilia	Squamata	Lacertidae	Darevskia	rudis	1	Least Concern	243568	243568	100
R54	Reptilia	Squamata	Lacertidae	Darevskia	sapphirina	1	Least Concern	9132.21	9132.21	100
R55	Reptilia	Squamata	Lacertidae	Darevskia	saxicola	1	Least Concern	127310	127310	100
R56	Reptilia	Squamata	Lacertidae	Darevskia	unisexualis	1	Near Threatened	23380.7	23380.7	100
R57	Reptilia	Squamata	Lacertidae	Darevskia	uzzelli	1	Endangered	48135.2	48135.2	100
R58	Reptilia	Squamata	Lacertidae	Darevskia	valentini	0	Least Concern	233576	233294	99.8795
R59	Reptilia	Squamata	Colubridae	Eirenis	aurolineatus	1	Least Concern	11626	11626	100
R6	Reptilia	Squamata	Lacertidae	Acanthodactylus	erythrurus	0	Least Concern	700430	486249	69.4216
R60	Reptilia	Squamata	Colubridae	Eirenis	barani	0	Least Concern	42308.2	29059.7	68.6857
R61	Reptilia	Squamata	Colubridae	Platyceps	collaris	0	Least Concern	297835	288920	97.0065
R62	Reptilia	Squamata	Colubridae	Eirenis	coronella	0	Not Evaluated	NO DATA ON GLOBAL EOO	36701.8	NO DATA ON GLOBAL EOO
R63	Reptilia	Squamata	Colubridae	Eirenis	decemlineatus	0	Least Concern	109819	44407.3	40.4366
R64	Reptilia	Squamata	Colubridae	Eirenis	eiselti	0	Least Concern	103321	102629	99.3305
R65	Reptilia	Squamata	Colubridae	Eirenis	hakkariensis	1	Not Evaluated	11610.7	11610.7	100
R66	Reptilia	Squamata	Colubridae	Eirenis	levantinus	0	Least Concern	44901.9	23956.3	53.3525
R67	Reptilia	Squamata	Colubridae	Eirenis	lineomaculatus	0	Least Concern	89293.4	30143.6	33.7579
R68	Reptilia	Squamata	Colubridae	Eirenis	modestus	0	Least Concern	1.10574e+06	1.01856e+06	92.1152
R69	Reptilia	Squamata	Colubridae	Eirenis	punctatolineatus	0	Least Concern	643883	295121	45.8346
R7	Reptilia	Squamata	Lacertidae	Acanthodactylus	schreiberi	0	Endangered	13077.4	12569	96.113
R70	Reptilia	Squamata	Colubridae	Eirenis	rothii	0	Least Concern	112133	19252.5	17.1693
R71	Reptilia	Squamata	Colubridae	Eirenis	thospitis	1	Data Deficient	20860.9	20860.9	100
R72	Reptilia	Squamata	Colubridae	Elaphe	dione	0	Not Evaluated	NO DATA ON GLOBAL EOO	26368.5	NO DATA ON GLOBAL EOO
R73	Reptilia	Squamata	Colubridae	Eirenis	medus	0	Least Concern	435590	11082.2	2.54418
R74	Reptilia	Squamata	Colubridae	Zamenis	hohenackeri	0	Least Concern	885556	827291	93.4205
R75	Reptilia	Squamata	Colubridae	Zamenis	lineatus	1	Data Deficient	84595.9	84595.9	100
R76	Reptilia	Squamata	Colubridae	Zamenis	longissimus	0	Least Concern	1.83876e+06	1.83747e+06	99.9296
R77	Reptilia	Squamata	Colubridae	Elaphe	quatuorlineata	1	Near Threatened	250027	250027	100
R78	Reptilia	Squamata	Colubridae	Rhinechis	scalaris	1	Least Concern	560315	560315	100
R79	Reptilia	Squamata	Colubridae	Zamenis	situla	1	Least Concern	425329	425329	100
R8	Reptilia	Squamata	Lacertidae	Algyroides	fitzingeri	1	Least Concern	32798.1	32798.1	100
R80	Reptilia	Testudines	Emydidae	Emys	orbicularis	0	Near Threatened	NO DATA ON GLOBAL EOO	4.07852e+06	NO DATA ON GLOBAL EOO
R81	Reptilia	Squamata	Lacertidae	Eremias	arguta	0	Not Evaluated	NO DATA ON GLOBAL EOO	1.26895e+06	NO DATA ON GLOBAL EOO
R82	Reptilia	Squamata	Lacertidae	Eremias	intermedia	0	Not Evaluated	NO DATA ON GLOBAL EOO	15695.7	NO DATA ON GLOBAL EOO
R83	Reptilia	Squamata	Lacertidae	Eremias	pleskei	0	Critically Endangered	77667.5	36783.7	47.3605
R84	Reptilia	Squamata	Lacertidae	Eremias	scripta	0	Not Evaluated	NO DATA ON GLOBAL EOO	31962.6	NO DATA ON GLOBAL EOO
R85	Reptilia	Squamata	Lacertidae	Eremias	strauchi	0	Least Concern	176639	57665.2	32.6457
R86	Reptilia	Squamata	Lacertidae	Eremias	suphani	1	Least Concern	19555.9	19555.9	100
R87	Reptilia	Squamata	Lacertidae	Eremias	velox	0	Not Evaluated	NO DATA ON GLOBAL EOO	479453	NO DATA ON GLOBAL EOO
R88	Reptilia	Squamata	Boidae	Eryx	jaculus	0	Not Evaluated	NO DATA ON GLOBAL EOO	659765	NO DATA ON GLOBAL EOO
R89	Reptilia	Squamata	Boidae	Eryx	miliaris	0	Not Evaluated	NO DATA ON GLOBAL EOO	280392	NO DATA ON GLOBAL EOO
R9	Reptilia	Squamata	Lacertidae	Algyroides	marchi	1	Endangered	4486.55	4486.55	100
R90	Reptilia	Squamata	Gekkonidae	Euleptes	europaea	0	Near Threatened	33849.9	28386.4	83.8596
R91	Reptilia	Squamata	Scincidae	Eumeces	schneideri	0	Not Evaluated	NO DATA ON GLOBAL EOO	494347	NO DATA ON GLOBAL EOO
R92	Reptilia	Squamata	Lacertidae	Gallotia	atlantica	1	Least Concern	2592.27	2592.27	100
R93	Reptilia	Squamata	Lacertidae	Gallotia	auaritae	1	Critically Endangered	459.18	459.18	100
R94	Reptilia	Squamata	Lacertidae	Gallotia	bravoana	1	Critically Endangered	52.87	52.87	100
R95	Reptilia	Squamata	Lacertidae	Gallotia	caesaris	1	Least Concern	713.02	713.02	100
R96	Reptilia	Squamata	Lacertidae	Gallotia	galloti	1	Least Concern	2777.24	2777.24	100
R97	Reptilia	Squamata	Lacertidae	Gallotia	intermedia	1	Critically Endangered	139.22	139.22	100
R98	Reptilia	Squamata	Lacertidae	Gallotia	simonyi	1	Critically Endangered	76.57	76.57	100
R99	Reptilia	Squamata	Lacertidae	Gallotia	stehlini	1	Least Concern	1631.97	1631.97	100
B1	Aves	Gaviformes	Gaviidae	Gavia	stellata	0	Least Concern	2.26326e+07	2.49624e+06	11.0294
B2	Aves	Gaviformes	Gaviidae	Gavia	arctica	0	Least Concern	1.8881e+07	3.83356e+06	20.3038
B3	Aves	Gaviformes	Gaviidae	Gavia	immer	0	Least Concern	9.35819e+06	96088.8	1.02679
B4	Aves	Gaviformes	Gaviidae	Gavia	adamsii	0	Near Threatened	4.01373e+06	1486.13	0.0370261
B5	Aves	Podicipediformes	Podicipedidae	Tachybaptus	ruficollis	0	Least Concern	3.68192e+07	5.12557e+06	13.9209
B6	Aves	Podicipediformes	Podicipedidae	Podiceps	cristatus	0	Least Concern	3.96399e+07	7.23297e+06	18.2467
B7	Aves	Podicipediformes	Podicipedidae	Podiceps	grisegena	0	Least Concern	1.85864e+07	4.80633e+06	25.8593
B8	Aves	Podicipediformes	Podicipedidae	Podiceps	auritus	0	Least Concern	1.63942e+07	2.72875e+06	16.6447
B9	Aves	Podicipediformes	Podicipedidae	Podiceps	nigricollis	0	Least Concern	1.69255e+07	4.25929e+06	25.165
B10	Aves	Procellariformes	Procellaridae	Fulmarus	glacialis	0	Least Concern	2.84752e+07	192285	0.675271
B11	Aves	Procellariformes	Procellaridae	Pterodroma	feae	0	Near Threatened	1.27224e+07	19.5956	0.000154024
B12	Aves	Procellariformes	Procellaridae	Pterodroma	madeira	1	Endangered	753.946	753.946	100
B13	Aves	Procellariformes	Procellaridae	Bulweria	bulwerii	0	Least Concern	1.08796e+08	5433.12	0.00499388
B14	Aves	Procellariformes	Procellaridae	Calonectris	diomedea	0	Least Concern	6.52969e+07	68609.8	0.105074
B15	Aves	Procellariformes	Procellaridae	Puffinus	puffinus	0	Least Concern	5.32369e+07	10760.1	0.0202118
B16	Aves	Procellariformes	Procellaridae	Puffinus	yelkouan	0	Vulnerable	3.00156e+06	19849.5	0.661306
B17	Aves	Procellariformes	Procellaridae	Puffinus	mauretanicus	0	Critically Endangered	4.58577e+06	2569.88	0.0560405
B18	Aves	Procellariformes	Procellaridae	Puffinus	assimilis	0	Least Concern	5.85541e+07	1924.43	0.00328658
B19	Aves	Procellariformes	Hydrobatidae	Pelagodroma	marina	0	Least Concern	61450.4	858.815	1.39758
B20	Aves	Procellariformes	Hydrobatidae	Hydrobates	pelagicus	1	Least Concern	88035.1	88035.1	100
B21	Aves	Procellariformes	Hydrobatidae	Oceanodroma	leucorhoa	0	Least Concern	1.3421e+06	8596.15	0.640498
B22	Aves	Procellariformes	Hydrobatidae	Oceanodroma	castro	0	Least Concern	13651.9	7487.73	54.8474
B23	Aves	Pelecaniformes	Phaethontidae	Phaethon	aethereus	0	Least Concern	24591.1	5778.83	23.4997
B24	Aves	Pelecaniformes	Sulidae	Morus	bassanus	0	Least Concern	40092.6	39588.2	98.7419
B25	Aves	Pelecaniformes	Phalacrocoracidae	Phalocrocorax	carbo	0	Least Concern	2.59799e+07	1.1774e+06	4.53198
B26	Aves	Pelecaniformes	Phalacrocoracidae	Phalocrocorax	aristotelis	1	Least Concern	330572	330572	100
B27	Aves	Pelecaniformes	Phalacrocoracidae	Phalocrocorax	pygmaeus	0	Least Concern	622084	208566	33.527
B28	Aves	Pelecaniformes	Pelecanidae	Pelecanus	onocrotalus	0	Least Concern	847801	61058.6	7.202
B29	Aves	Pelecaniformes	Pelecanidae	Pelecanus	crispus	0	Vulnerable	3.31892e+06	99270.7	2.99105
B30	Aves	Ciconiformes	Ardeidae	Ardea	cinerea	0	Least Concern	9.99998e+07	6.28715e+06	6.28717
B31	Aves	Ciconiformes	Ardeidae	Ardea	purpurea	0	Least Concern	3.50915e+07	2.37296e+06	6.76222
B32	Aves	Ciconiformes	Ardeidae	Egretta	alba	0	Least Concern	7.49305e+07	976039	1.30259
B33	Aves	Ciconiformes	Ardeidae	Egretta	garzetta	0	Least Concern	3.94972e+07	1.33347e+06	3.37611
B34	Aves	Ciconiformes	Ardeidae	Ardeola	ralloides	0	Least Concern	2.0467e+07	799804	3.90777
B35	Aves	Ciconiformes	Ardeidae	Bubulcus	ibis	0	Least Concern	6.26523e+07	250775	0.400265
B36	Aves	Ciconiformes	Ardeidae	Nycticorax	nycticorax	0	Least Concern	2.1479e+07	1.69736e+06	7.9024
B37	Aves	Ciconiformes	Ardeidae	Ixobrychus	minutus	0	Least Concern	2.95e+07	4.99783e+06	16.9418
B38	Aves	Ciconiformes	Ardeidae	Botaurus	stellaris	0	Least Concern	1.8089e+07	4.63007e+06	25.5961
B39	Aves	Ciconiformes	Ciconiidae	Ciconia	nigra	0	Least Concern	1.87537e+07	3.92835e+06	20.9471
B40	Aves	Ciconiformes	Ciconiidae	Ciconia	ciconia	0	Least Concern	6.31913e+06	4.64001e+06	73.428
B41	Aves	Ciconiformes	Threskiornithidae	Plegadis	falcinellus	0	Least Concern	1.951e+07	361672	1.85378
B42	Aves	Ciconiformes	Threskiornithidae	Platalea	leucorodia	0	Least Concern	6.24916e+06	403265	6.4531
B43	Aves	Phoenicopteriformes	Phoenicopteridae	Phoenicopterus	roseus	0	Least Concern	5.08974e+06	43177	0.848314
B44	Aves	Anseriformes	Anatidae	Cygnus	olor	0	Least Concern	4.98029e+06	3.64181e+06	73.1245
B45	Aves	Anseriformes	Anatidae	Cygnus	cygnus	0	Least Concern	1.7054e+07	2.13854e+06	12.5398
B46	Aves	Anseriformes	Anatidae	Cygnus	columbianus	0	Least Concern	5.26983e+06	160835	3.052
B47	Aves	Anseriformes	Anatidae	Anser	fabalis	0	Least Concern	1.38739e+07	1.52591e+06	10.9984
B48	Aves	Anseriformes	Anatidae	Anser	brachyrhynchus	0	Least Concern	189914	69108.9	36.3896
B49	Aves	Anseriformes	Anatidae	Anser	albifrons	0	Least Concern	2.3499e+06	235183	10.0082
B50	Aves	Anseriformes	Anatidae	Anser	erythropus	0	Vulnerable	2.59934e+06	266468	10.2514
B51	Aves	Anseriformes	Anatidae	Anser	anser	0	Least Concern	1.3264e+07	2.44942e+06	18.4667
B53	Aves	Anseriformes	Anatidae	Branta	leucopsis	0	Least Concern	355430	145744	41.005
B54	Aves	Anseriformes	Anatidae	Branta	bernicla	0	Least Concern	1.39578e+06	36019.4	2.5806
B56	Aves	Anseriformes	Anatidae	Tadorna	ferruginea	0	Least Concern	1.84218e+07	1.30921e+06	7.10686
B57	Aves	Anseriformes	Anatidae	Tadorna	tadorna	0	Least Concern	9.38663e+06	1.34313e+06	14.309
B58	Aves	Anseriformes	Anatidae	Anas	penelope	0	Least Concern	1.62894e+07	4.21533e+06	25.8777
B59	Aves	Anseriformes	Anatidae	Anas	strepera	0	Least Concern	1.81412e+07	4.29324e+06	23.6657
B60	Aves	Anseriformes	Anatidae	Anas	crecca	0	Least Concern	3.17048e+07	7.19968e+06	22.7085
B61	Aves	Anseriformes	Anatidae	Anas	platyrhynchos	0	Least Concern	3.57298e+07	1.00389e+07	28.0966
B62	Aves	Anseriformes	Anatidae	Anas	acuta	0	Least Concern	9.39797e+06	4.75523e+06	50.5985
B63	Aves	Anseriformes	Anatidae	Anas	querquedula	0	Least Concern	1.68358e+07	6.87018e+06	40.8069
B64	Aves	Anseriformes	Anatidae	Anas	clypeata	0	Least Concern	20800000	6.32555e+06	30.4113
B65	Aves	Anseriformes	Anatidae	Marmaronetta	angustirostris	0	Vulnerable	1.46417e+06	54039	3.69075
B66	Aves	Anseriformes	Anatidae	Netta	rufina	0	Least Concern	6.13625e+06	1.11502e+06	18.171
B67	Aves	Anseriformes	Anatidae	Aythya	ferina	0	Least Concern	1.65517e+07	6.08384e+06	36.7566
B68	Aves	Anseriformes	Anatidae	Aythya	nyroca	0	Near Threatened	7.02733e+06	1.90396e+06	27.0936
B69	Aves	Anseriformes	Anatidae	Aythya	fuligula	0	Least Concern	2.03861e+07	6.48477e+06	31.8098
B70	Aves	Anseriformes	Anatidae	Aythya	marila	0	Least Concern	7.79694e+06	1.20048e+06	15.3968
B71	Aves	Anseriformes	Anatidae	Somateria	mollissima	0	Least Concern	3.30851e+06	570855	17.2541
B72	Aves	Anseriformes	Anatidae	Somateria	spectabilis	0	Least Concern	3.18096e+06	168072	5.2837
B73	Aves	Anseriformes	Anatidae	Polysticta	stelleri	0	Vulnerable	1.07713e+06	1502.17	0.13946
B74	Aves	Anseriformes	Anatidae	Histrionicus	histrionicus	0	Least Concern	7.88982e+06	103892	1.31678
B75	Aves	Anseriformes	Anatidae	Clangula	hyemalis	0	Least Concern	1.07136e+07	936457	8.74084
B76	Aves	Anseriformes	Anatidae	Melanitta	nigra	0	Least Concern	8.26437e+06	1.34516e+06	16.2766
B77	Aves	Anseriformes	Anatidae	Melanitta	fusca	0	Endangered	1.70389e+07	1.18916e+06	6.97906
B78	Aves	Anseriformes	Anatidae	Bucephala	clangula	0	Least Concern	2.20283e+07	4.12606e+06	18.7307
B79	Aves	Anseriformes	Anatidae	Bucephala	islandica	0	Least Concern	2.22201e+06	8667.5	0.390074
B80	Aves	Anseriformes	Anatidae	Mergellus	albellus	0	Least Concern	1900000	1.46285e+06	76.9921
B81	Aves	Anseriformes	Anatidae	Mergus	serrator	0	Least Concern	2.35959e+07	2.39993e+06	10.171
B82	Aves	Anseriformes	Anatidae	Mergus	merganser	0	Least Concern	2.18136e+07	3.66188e+06	16.7871
B84	Aves	Anseriformes	Anatidae	Oxyura	leucocephala	0	Endangered	3.95965e+06	125543	3.17055
B85	Aves	Falconiformes	Accipitridae	Pandion	haliaetus	0	Least Concern	3.1274e+07	5.12527e+06	16.3883
B86	Aves	Falconiformes	Accipitridae	Pernis	apivorus	0	Least Concern	8.97539e+06	7.12019e+06	79.3302
B87	Aves	Falconiformes	Accipitridae	Elanus	caeruleus	0	Least Concern	2.67128e+07	246116	0.92134
B88	Aves	Falconiformes	Accipitridae	Milvus	milvus	0	Near Threatened	1.9632e+06	1.93288e+06	98.4556
B89	Aves	Falconiformes	Accipitridae	Milvus	migrans	0	Least Concern	6.60269e+07	7.0828e+06	10.7271
B90	Aves	Falconiformes	Accipitridae	Haliaeetus	albicilla	0	Least Concern	4.63387e+06	4.35598e+06	94.0031
B91	Aves	Falconiformes	Accipitridae	Gypaetus	barbatus	0	Least Concern	8.85874e+06	803697	9.07237
B92	Aves	Falconiformes	Accipitridae	Neophron	percnopterus	0	Endangered	2.12869e+07	1.39244e+06	6.54131
B93	Aves	Falconiformes	Accipitridae	Gyps	fulvus	0	Least Concern	1.01902e+07	1.14942e+06	11.2797
B94	Aves	Falconiformes	Accipitridae	Aegypius	monachus	0	Near Threatened	1.36679e+07	596034	4.36085
B95	Aves	Falconiformes	Accipitridae	Circaetus	gallicus	0	Least Concern	1.30257e+07	4.64545e+06	35.6637
B96	Aves	Falconiformes	Accipitridae	Circus	aeruginosus	0	Least Concern	1.34672e+07	6.77781e+06	50.3281
B97	Aves	Falconiformes	Accipitridae	Circus	cyaneus	0	Least Concern	2.98503e+07	5.85952e+06	19.6297
B98	Aves	Falconiformes	Accipitridae	Circus	macrourus	0	Near Threatened	6.1567e+06	1.16253e+06	18.8823
B99	Aves	Falconiformes	Accipitridae	Circus	pygargus	0	Least Concern	9.40688e+06	5.05675e+06	53.7559
B100	Aves	Falconiformes	Accipitridae	Accipiter	brevipes	0	Least Concern	1.17797e+06	1.11103e+06	94.3169
B101	Aves	Falconiformes	Accipitridae	Accipiter	nisus	0	Least Concern	2.35747e+07	8.70414e+06	36.9215
B102	Aves	Falconiformes	Accipitridae	Accipiter	gentilis	0	Least Concern	3.1715e+07	8.01845e+06	25.2828
B103	Aves	Falconiformes	Accipitridae	Buteo	buteo	0	Least Concern	1.95078e+07	8.71965e+06	44.6983
B104	Aves	Falconiformes	Accipitridae	Buteo	rufinus	0	Least Concern	8.90262e+06	1.82676e+06	20.5194
B105	Aves	Falconiformes	Accipitridae	Buteo	lagopus	0	Least Concern	9.15081e+06	1.57432e+06	17.2042
B106	Aves	Falconiformes	Accipitridae	Aquila	pomarina	0	Least Concern	2.62546e+06	1.7622e+06	67.1196
B107	Aves	Falconiformes	Accipitridae	Aquila	clanga	0	Vulnerable	1.01239e+07	3.06135e+06	30.2389
B108	Aves	Falconiformes	Accipitridae	Aquila	nipalensis	0	Least Concern	6.58239e+06	599556	9.10848
B109	Aves	Falconiformes	Accipitridae	Aquila	adalberti	1	Vulnerable	122051	122051	100
B110	Aves	Falconiformes	Accipitridae	Aquila	heliaca	0	Vulnerable	9.54496e+06	1.79971e+06	18.8551
B111	Aves	Falconiformes	Accipitridae	Aquila	chrysaetos	0	Least Concern	4.14105e+07	5.14442e+06	12.423
B112	Aves	Falconiformes	Accipitridae	Aquila	fasciatus	0	Least Concern	5.46396e+06	639965	11.7125
B113	Aves	Falconiformes	Accipitridae	Hieraaetus	pennatus	0	Least Concern	7.20455e+06	2.93698e+06	40.7656
B114	Aves	Falconiformes	Falconidae	Falco	naumanni	0	Least Concern	1.01411e+07	2.31589e+06	22.8367
B115	Aves	Falconiformes	Falconidae	Falco	tinnunculus	0	Least Concern	5.14038e+07	1.02475e+07	19.9353
B116	Aves	Falconiformes	Falconidae	Falco	vespertinus	0	Near Threatened	9.37852e+06	3.10399e+06	33.0967
B117	Aves	Falconiformes	Falconidae	Falco	eleonorae	0	Least Concern	140625	39588.8	28.152
B118	Aves	Falconiformes	Falconidae	Falco	columbarius	0	Least Concern	2.62523e+07	3.81102e+06	14.5169
B119	Aves	Falconiformes	Falconidae	Falco	subbuteo	0	Least Concern	2.92139e+07	8.51572e+06	29.1495
B120	Aves	Falconiformes	Falconidae	Falco	biarmicus	0	Least Concern	1.80085e+07	242961	1.34915
B121	Aves	Falconiformes	Falconidae	Falco	cherrug	0	Endangered	1.14981e+07	1.7617e+06	15.3217
B122	Aves	Falconiformes	Falconidae	Falco	rusticolus	0	Least Concern	8.5857e+06	760968	8.8632
B123	Aves	Falconiformes	Falconidae	Falco	peregrinus	0	Least Concern	4.61675e+07	5.18308e+06	11.2267
B124	Aves	Galliformes	Phasianidae	Lagopus	lagopus	0	Least Concern	2.42214e+07	3.25351e+06	13.4324
B125	Aves	Galliformes	Phasianidae	Lagopus	muta	0	Least Concern	1.48743e+07	887941	5.96965
B126	Aves	Galliformes	Phasianidae	Tetrao	urogallus	0	Least Concern	1.12957e+07	4.23075e+06	37.4544
B127	Aves	Galliformes	Phasianidae	Tetrao	tetrix	0	Least Concern	1.39072e+07	4.49308e+06	32.3076
B128	Aves	Galliformes	Phasianidae	Tetrao	mlokosiewiczi	1	Near Threatened	172290	172290	100
B129	Aves	Galliformes	Phasianidae	Bonasa	bonasia	0	Least Concern	1.5628e+07	4.60148e+06	29.4438
B130	Aves	Galliformes	Phasianidae	Tetraogallus	caucasicus	1	Least Concern	76001.3	76001.3	100
B131	Aves	Galliformes	Phasianidae	Tetraogallus	caspius	0	Least Concern	314481	145930	46.4033
B132	Aves	Galliformes	Phasianidae	Alectoris	graeca	1	Near Threatened	620130	620130	100
B133	Aves	Galliformes	Phasianidae	Alectoris	chukar	0	Least Concern	1.03565e+07	1.03542e+06	9.99782
B134	Aves	Galliformes	Phasianidae	Alectoris	barbara	0	Least Concern	1.36516e+06	30990.7	2.27011
B135	Aves	Galliformes	Phasianidae	Alectoris	rufa	1	Least Concern	1.19944e+06	1.19944e+06	100
B136	Aves	Galliformes	Phasianidae	Ammoperdix	griseogularis	0	Least Concern	2.9528e+06	30782.8	1.04249
B137	Aves	Galliformes	Phasianidae	Francolinus	francolinus	0	Least Concern	3.03451e+06	58646	1.93263
B138	Aves	Galliformes	Phasianidae	Perdix	perdix	0	Least Concern	1.00158e+07	7.12529e+06	71.1402
B139	Aves	Galliformes	Phasianidae	Coturnix	coturnix	0	Least Concern	2.13188e+07	8.44255e+06	39.6015
B140	Aves	Galliformes	Phasianidae	Phasianus	colchicus	0	Least Concern	7.48576e+06	4.82316e+06	64.4312
B141	Aves	Gruiformes	Turnicidae	Turnix	sylvatica	0	Least Concern	1.75066e+07	1995.21	0.0113969
B142	Aves	Gruiformes	Gruidae	Anthropoides	virgo	0	Least Concern	9.19061e+06	638143	6.94343
B143	Aves	Gruiformes	Gruidae	Grus	grus	0	Least Concern	1.53113e+07	5.2789e+06	34.4773
B144	Aves	Gruiformes	Rallidae	Rallus	aquaticus	0	Least Concern	1.55718e+07	6.51406e+06	41.8325
B145	Aves	Gruiformes	Rallidae	Crex	crex	0	Least Concern	1.24123e+07	5.92873e+06	47.7651
B146	Aves	Gruiformes	Rallidae	Porzana	parva	0	Least Concern	6.50059e+06	3.2069e+06	49.3325
B147	Aves	Gruiformes	Rallidae	Porzana	pusilla	0	Least Concern	1.76609e+07	2.16343e+06	12.2498
B148	Aves	Gruiformes	Rallidae	Porzana	porzana	0	Least Concern	1.06119e+07	5.52394e+06	52.0544
B149	Aves	Gruiformes	Rallidae	Porphyrio	porphyrio	0	Least Concern	1.85102e+07	162546	0.878142
B150	Aves	Gruiformes	Rallidae	Gallinula	chloropus	0	Least Concern	5.12157e+07	7.57018e+06	14.781
B151	Aves	Gruiformes	Rallidae	Fulica	cristata	0	Least Concern	5.31592e+06	11004.7	0.207013
B152	Aves	Gruiformes	Rallidae	Fulica	atra	0	Least Concern	2.74574e+07	7.22881e+06	26.3274
B153	Aves	Gruiformes	Otididae	Otis	tarda	0	Vulnerable	4.91171e+06	1.32381e+06	26.9522
B154	Aves	Galliformes	Phasianidae	Tetrax	tetrax	0	Near Threatened	5.092e+06	1.08755e+06	21.358
B155	Aves	Charadriformes	Haematopodidae	Haematopus	ostralegus	0	Least Concern	9.58392e+06	3.63301e+06	37.9074
B156	Aves	Charadriformes	Recurvirostridae	Himantopus	himantopus	0	Least Concern	3.08839e+07	1.77053e+06	5.73287
B157	Aves	Charadriformes	Recurvirostridae	Recurvirostra	avosetta	0	Least Concern	1.56015e+07	1.3103e+06	8.39853
B158	Aves	Charadriformes	Burhinidae	Burhinus	oedicnemus	0	Least Concern	1.41053e+07	2.67161e+06	18.9405
B159	Aves	Charadriformes	Glareolidae	Glareola	pratincola	0	Least Concern	5.36699e+06	706318	13.1604
B160	Aves	Charadriformes	Glareolidae	Glareola	nordmanni	0	Near Threatened	3.61213e+06	1.53657e+06	42.5392
B161	Aves	Charadriformes	Charadridae	Vanellus	vanellus	0	Least Concern	1.85703e+07	8.33859e+06	44.9029
B162	Aves	Charadriformes	Charadridae	Vanellus	spinosus	0	Least Concern	8.22439e+06	66514.7	0.808749
B163	Aves	Charadriformes	Charadridae	Vanellus	indicus	0	Least Concern	5.24089e+06	3513.68	0.0670435
B164	Aves	Charadriformes	Charadridae	Vanellus	gregarius	0	Critically Endangered	1.49783e+06	339349	22.6561
B165	Aves	Charadriformes	Charadridae	Vanellus	leucurus	0	Least Concern	1.80183e+06	11922.6	0.661696
B166	Aves	Charadriformes	Charadridae	Pluvialis	apricaria	0	Least Concern	3.22689e+06	1.99969e+06	61.9696
B167	Aves	Charadriformes	Charadridae	Pluvialis	squatarola	0	Least Concern	3.95154e+06	93976.2	2.37822
B168	Aves	Charadriformes	Charadridae	Charadrius	hiaticula	0	Least Concern	4.50501e+06	1.99535e+06	44.2919
B169	Aves	Charadriformes	Charadridae	Charadrius	dubius	0	Least Concern	3.36401e+07	8.49041e+06	25.2389
B170	Aves	Charadriformes	Charadridae	Charadrius	alexandrinus	0	Least Concern	1.48353e+07	1.1168e+06	7.52802
B171	Aves	Charadriformes	Charadridae	Charadrius	leschenaultii	0	Least Concern	6.07915e+06	34437.8	0.566489
B172	Aves	Charadriformes	Charadridae	Charadrius	asiaticus	0	Least Concern	3.03174e+06	170445	5.62201
B173	Aves	Charadriformes	Charadridae	Eudromias	morinellus	0	Least Concern	3.7849e+06	789044	20.8472
B174	Aves	Charadriformes	Scolopacidae	Scolopax	rusticola	0	Least Concern	1.50993e+07	6.46357e+06	42.8072
B175	Aves	Charadriformes	Scolopacidae	Lymnocryptes	minimus	0	Least Concern	7.64552e+06	2.54606e+06	33.3013
B176	Aves	Charadriformes	Scolopacidae	Gallinago	stenura	0	Least Concern	8.74891e+06	217791	2.48935
B177	Aves	Charadriformes	Scolopacidae	Gallinago	media	0	Near Threatened	8.23778e+06	3.87656e+06	47.0584
B178	Aves	Charadriformes	Scolopacidae	Gallinago	gallinago	0	Least Concern	1.19479e+07	6.99008e+06	58.5046
B179	Aves	Charadriformes	Scolopacidae	Limosa	limosa	0	Near Threatened	1.04559e+07	3.60853e+06	34.5117
B180	Aves	Charadriformes	Scolopacidae	Limosa	lapponica	0	Least Concern	1.46719e+06	253970	17.3099
B181	Aves	Charadriformes	Scolopacidae	Numenius	phaeopus	0	Least Concern	4.7759e+06	2.66092e+06	55.7154
B182	Aves	Charadriformes	Scolopacidae	Numenius	arquata	0	Near Threatened	1.2451e+07	5.70996e+06	45.8596
B183	Aves	Charadriformes	Scolopacidae	Tringa	erythropus	0	Least Concern	3.70577e+06	749120	20.215
B184	Aves	Charadriformes	Scolopacidae	Tringa	totanus	0	Least Concern	1.50458e+07	6.08855e+06	40.4669
B185	Aves	Charadriformes	Scolopacidae	Tringa	stagnatilis	0	Least Concern	6.29215e+06	1.93356e+06	30.7297
B186	Aves	Charadriformes	Scolopacidae	Tringa	nebularia	0	Least Concern	1.20986e+07	3.18242e+06	26.304
B187	Aves	Charadriformes	Scolopacidae	Tringa	ochropus	0	Least Concern	1.48127e+07	5.22654e+06	35.2841
B188	Aves	Charadriformes	Scolopacidae	Tringa	glareola	0	Least Concern	15500000	4.26051e+06	27.4872
B189	Aves	Charadriformes	Scolopacidae	Xenus	cinereus	0	Least Concern	1.16107e+07	2.29528e+06	19.7686
B190	Aves	Charadriformes	Scolopacidae	Actitis	hypoleucos	0	Least Concern	2.58045e+07	8.32217e+06	32.2508
B191	Aves	Charadriformes	Scolopacidae	Arenaria	interpres	0	Least Concern	2.60694e+06	307140	11.7816
B192	Aves	Charadriformes	Scolopacidae	Calidris	canutus	0	Least Concern	1.59563e+06	145533	9.12074
B193	Aves	Charadriformes	Scolopacidae	Calidris	alba	0	Least Concern	1.25179e+06	8766.04	0.700283
B194	Aves	Charadriformes	Scolopacidae	Calidris	minuta	0	Least Concern	1.72729e+06	117348	6.79378
B195	Aves	Charadriformes	Scolopacidae	Calidris	temminckii	0	Least Concern	3.42824e+06	604171	17.6234
B196	Aves	Charadriformes	Scolopacidae	Calidris	melanotos	0	Least Concern	2.21367e+06	11425.7	0.516142
B197	Aves	Charadriformes	Scolopacidae	Calidris	alpina	0	Least Concern	4.93192e+06	898586	18.2198
B198	Aves	Charadriformes	Scolopacidae	Calidris	maritima	0	Least Concern	2.73682e+06	508299	18.5726
B199	Aves	Charadriformes	Scolopacidae	Limicola	falcinellus	0	Least Concern	1.00129e+06	656580	65.5735
B200	Aves	Charadriformes	Scolopacidae	Philomachus	pugnax	0	Least Concern	8580000	4.38906e+06	51.1546
B201	Aves	Charadriformes	Scolopacidae	Phalaropus	lobatus	0	Least Concern	9.10474e+06	1.11053e+06	12.1973
B202	Aves	Charadriformes	Scolopacidae	Phalaropus	fulicarius	0	Least Concern	3.85603e+06	31502.7	0.816973
B203	Aves	Charadriformes	Stercoraridae	Stercorarius	skua	1	Least Concern	65815.5	65815.5	100
B204	Aves	Charadriformes	Stercoraridae	Stercorarius	pomarinus	0	Least Concern	3.03268e+06	118779	3.91665
B205	Aves	Charadriformes	Stercoraridae	Stercorarius	parasiticus	0	Least Concern	6.25692e+06	626060	10.0059
B206	Aves	Charadriformes	Stercoraridae	Stercorarius	longicaudus	0	Least Concern	6.21199e+06	501476	8.07271
B207	Aves	Charadriformes	Laridae	Larus	canus	0	Least Concern	1.78912e+07	4.62845e+06	25.8699
B208	Aves	Charadriformes	Laridae	Larus	audouinii	0	Near Threatened	52524.4	44010.1	83.7898
B209	Aves	Charadriformes	Laridae	Larus	marinus	0	Least Concern	1.06698e+06	778439	72.9573
B210	Aves	Charadriformes	Laridae	Larus	hyperboreus	0	Least Concern	2.41833e+06	142486	5.89193
B211	Aves	Charadriformes	Laridae	Larus	glaucoides	0	Least Concern	1.4517e+06	16274.9	1.12109
B212	Aves	Charadriformes	Laridae	Larus	argentatus	0	Least Concern	2.21597e+07	1.8623e+06	8.40401
B213	Aves	Charadriformes	Laridae	Larus	fuscus	1	Least Concern	1.4713e+06	1.4713e+06	100
B214	Aves	Charadriformes	Laridae	Larus	cachinnans	0	Least Concern	1.84223e+06	1.29381e+06	70.2305
B215	Aves	Charadriformes	Laridae	Larus	armenicus	0	Not Evaluated	22055.5	21765.2	98.6838
B216	Aves	Charadriformes	Laridae	Larus	ichthyaetus	0	Least Concern	4.87812e+06	77820.5	1.5953
B217	Aves	Charadriformes	Laridae	Larus	ridibundus	0	Least Concern	1.67021e+07	6.74769e+06	40.4003
B218	Aves	Charadriformes	Laridae	Larus	genei	0	Least Concern	3.12133e+06	106053	3.3977
B219	Aves	Charadriformes	Laridae	Larus	melanocephalus	1	Least Concern	308544	308544	100
B220	Aves	Charadriformes	Laridae	Larus	minutus	0	Least Concern	8.16771e+06	2.3794e+06	29.1318
B221	Aves	Charadriformes	Laridae	Pagophila	eburnea	0	Near Threatened	394836	31144.4	7.88792
B222	Aves	Charadriformes	Laridae	Xema	sabini	0	Least Concern	1.56197e+06	2006.54	0.128462
B223	Aves	Charadriformes	Laridae	Rissa	tridactyla	0	Least Concern	1.637e+06	264129	16.135
B224	Aves	Charadriformes	Laridae	Gelochelidon	nilotica	0	Least Concern	7.96217e+06	358266	4.4996
B225	Aves	Charadriformes	Laridae	Sterna	caspia	0	Least Concern	6.30331e+06	175555	2.78512
B226	Aves	Charadriformes	Laridae	Sterna	bengalensis	0	Least Concern	1.83115e+06	3840.26	0.209719
B227	Aves	Charadriformes	Laridae	Sterna	sandvicensis	0	Least Concern	1.20876e+06	226916	18.7726
B228	Aves	Charadriformes	Laridae	Sterna	dougallii	0	Least Concern	769035	45572.9	5.92598
B229	Aves	Charadriformes	Laridae	Sterna	hirundo	0	Least Concern	2.91354e+07	6.66975e+06	22.8923
B230	Aves	Charadriformes	Laridae	Sterna	paradisaea	0	Least Concern	1.02101e+07	1.29157e+06	12.6499
B231	Aves	Charadriformes	Laridae	Sterna	albifrons	0	Least Concern	1.18366e+07	1.60056e+06	13.5222
B232	Aves	Charadriformes	Laridae	Sterna	fuscata	0	Least Concern	121115	1038.56	0.857503
B233	Aves	Charadriformes	Laridae	Chlidonias	hybrida	0	Least Concern	1.00601e+07	1.04484e+06	10.386
B234	Aves	Charadriformes	Laridae	Chlidonias	leucopterus	0	Least Concern	6.19179e+06	2.76588e+06	44.6701
B235	Aves	Charadriformes	Laridae	Chlidonias	niger	0	Least Concern	1.2927e+07	4.05446e+06	31.3642
B236	Aves	Charadriformes	Alcidae	Alle	alle	0	Least Concern	373313	32591	8.73021
B237	Aves	Charadriformes	Alcidae	Uria	aalge	0	Least Concern	1.43478e+06	123961	8.63971
B238	Aves	Charadriformes	Alcidae	Uria	lomvia	0	Least Concern	2.23903e+06	52778.1	2.35718
B239	Aves	Charadriformes	Alcidae	Alca	torda	0	Least Concern	1.2243e+06	147815	12.0735
B240	Aves	Charadriformes	Alcidae	Cepphus	grylle	0	Least Concern	2.10683e+06	361636	17.1649
B241	Aves	Charadriformes	Alcidae	Fratercula	arctica	0	Least Concern	1.61722e+06	142989	8.84165
B242	Aves	Columbiformes	Pteroclididae	Pterocles	alchata	0	Least Concern	3.17032e+06	254719	8.03447
B243	Aves	Columbiformes	Pteroclididae	Pterocles	orientalis	0	Least Concern	5.5302e+06	672238	12.1558
B244	Aves	Columbiformes	Columbidae	Columba	livia	0	Least Concern	17400000	8.65172e+06	49.7225
B245	Aves	Columbiformes	Columbidae	Columba	oenas	0	Least Concern	9.26042e+06	7.14172e+06	77.1209
B246	Aves	Columbiformes	Columbidae	Columba	palumbus	0	Least Concern	1.19427e+07	9.39218e+06	78.6435
B247	Aves	Columbiformes	Columbidae	Columba	trocaz	1	Near Threatened	753.946	753.946	100
B248	Aves	Columbiformes	Columbidae	Streptopelia	turtur	0	Least Concern	1.75874e+07	8.59528e+06	48.8719
B249	Aves	Columbiformes	Columbidae	Streptopelia	decaocto	0	Least Concern	1.73587e+07	6.83331e+06	39.3654
B250	Aves	Columbiformes	Columbidae	Stigmatopelia	senegalensis	0	Least Concern	2.52209e+07	89466.6	0.354732
B251	Aves	Cuculiformes	Cuculidae	Clamator	glandarius	0	Least Concern	1.3736e+07	776422	5.65246
B252	Aves	Cuculiformes	Cuculidae	Cuculus	canorus	0	Least Concern	3.73801e+07	1.02609e+07	27.4503
B253	Aves	Cuculiformes	Cuculidae	Cuculus	saturatus	0	Least Concern	3.56644e+06	954846	26.7731
B254	Aves	Strigiformes	Tytonidae	Tyto	alba	0	Least Concern	6.34267e+07	3.10321e+06	4.8926
B255	Aves	Strigiformes	Strigidae	Otus	brucei	0	Least Concern	1.90107e+06	5546.54	0.291759
B256	Aves	Strigiformes	Strigidae	Otus	scops	0	Least Concern	8.5437e+06	4.49878e+06	52.6561
B257	Aves	Strigiformes	Strigidae	Bubo	bubo	0	Least Concern	3.20102e+07	7.26222e+06	22.6872
B258	Aves	Strigiformes	Strigidae	Bubo	scandiaca	0	Least Concern	5.74393e+06	581150	10.1176
B259	Aves	Strigiformes	Strigidae	Strix	aluco	0	Least Concern	1.43595e+07	7.20022e+06	50.1426
B260	Aves	Strigiformes	Strigidae	Strix	uralensis	0	Least Concern	1.46896e+07	3.04723e+06	20.7441
B261	Aves	Strigiformes	Strigidae	Strix	nebulosa	0	Least Concern	1.97361e+07	2.37468e+06	12.0321
B262	Aves	Strigiformes	Strigidae	Surnia	ulula	0	Least Concern	2.10559e+07	2.90061e+06	13.7758
B263	Aves	Strigiformes	Strigidae	Glaucidium	passerinum	0	Least Concern	1.13372e+07	3.83074e+06	33.789
B264	Aves	Strigiformes	Strigidae	Athene	noctua	0	Least Concern	2.67642e+07	6.40157e+06	23.9184
B265	Aves	Strigiformes	Strigidae	Aegolius	funereus	0	Least Concern	1.66205e+07	4.69535e+06	28.2504
B266	Aves	Strigiformes	Strigidae	Asio	otus	0	Least Concern	2.83367e+07	8.05187e+06	28.415
B267	Aves	Strigiformes	Strigidae	Asio	flammeus	0	Least Concern	4.14408e+07	6.73276e+06	16.2467
B268	Aves	Caprimulgiformes	Caprimulgidae	Caprimulgus	ruficollis	0	Least Concern	813000	328623	40.421
B269	Aves	Caprimulgiformes	Caprimulgidae	Caprimulgus	europaeus	0	Least Concern	1.89955e+07	7.9126e+06	41.6552
B270	Aves	Apodiformes	Apodidae	Tachymarptis	melba	0	Least Concern	7.3713e+06	2.11193e+06	28.6508
B271	Aves	Apodiformes	Apodidae	Apus	apus	0	Least Concern	2.47645e+07	1.00608e+07	40.6258
B272	Aves	Apodiformes	Apodidae	Apus	unicolor	0	Least Concern	8415.16	802.264	9.53356
B273	Aves	Apodiformes	Apodidae	Apus	pallidus	0	Least Concern	1.72525e+06	396528	22.9838
B274	Aves	Apodiformes	Apodidae	Apus	affinis	0	Least Concern	2.22875e+07	11088.6	0.0497524
B275	Aves	Apodiformes	Apodidae	Apus	caffer	0	Least Concern	1.25154e+07	74450.7	0.594872
B276	Aves	Coraciformes	Alcedinidae	Alcedo	atthis	0	Least Concern	2.50344e+07	6.69003e+06	26.7233
B277	Aves	Coraciformes	Alcedinidae	Halcyon	smyrnensis	0	Least Concern	7.20498e+06	26977.1	0.374422
B278	Aves	Coraciformes	Alcedinidae	Ceryle	rudis	0	Least Concern	2.40221e+07	67515	0.281053
B279	Aves	Coraciformes	Meropidae	Merops	superciliosus	0	Least Concern	4.2961e+06	97473.2	2.26888
B280	Aves	Coraciformes	Meropidae	Merops	apiaster	0	Least Concern	1.10426e+07	4.58342e+06	41.5067
B281	Aves	Coraciformes	Coraciidae	Coracias	garrulus	0	Near Threatened	1.03698e+07	4.98755e+06	48.0969
B282	Aves	Coraciformes	Upupidae	Upupa	epops	0	Least Concern	4.70045e+07	6.68607e+06	14.2243
B283	Aves	Piciformes	Picidae	Jynx	torquilla	0	Least Concern	1.75642e+07	7.64632e+06	43.5336
B284	Aves	Piciformes	Picidae	Dendrocopos	minor	0	Least Concern	1.88744e+07	8.10469e+06	42.9402
B285	Aves	Piciformes	Picidae	Dendrocopos	medius	0	Least Concern	3.90512e+06	3.31483e+06	84.8842
B286	Aves	Piciformes	Picidae	Dendrocopos	leucotos	0	Least Concern	1.1083e+07	3.84235e+06	34.6688
B287	Aves	Piciformes	Picidae	Dendrocopos	major	0	Least Concern	2.43807e+07	8.88987e+06	36.4628
B288	Aves	Piciformes	Picidae	Dendrocopos	syriacus	0	Least Concern	2.63046e+06	2.17977e+06	82.8663
B289	Aves	Piciformes	Picidae	Picoides	tridactylus	0	Least Concern	1.45789e+07	4.1134e+06	28.2148
B290	Aves	Piciformes	Picidae	Dryocopus	martius	0	Least Concern	1.95887e+07	6.6212e+06	33.8011
B291	Aves	Piciformes	Picidae	Picus	viridis	0	Least Concern	6.49522e+06	6.12245e+06	94.2608
B292	Aves	Piciformes	Picidae	Picus	canus	0	Least Concern	1.5287e+07	5.34254e+06	34.9483
B293	Aves	Passeriformes	Alaudidae	Ammomanes	deserti	0	Least Concern	1.04696e+07	1956.11	0.0186837
B294	Aves	Passeriformes	Alaudidae	Melanocorypha	calandra	0	Least Concern	5.6389e+06	2.5065e+06	44.4502
B295	Aves	Passeriformes	Alaudidae	Melanocorypha	bimaculata	0	Least Concern	3.17888e+06	408760	12.8586
B296	Aves	Passeriformes	Alaudidae	Melanocorypha	leucoptera	0	Least Concern	2.97384e+06	549829	18.4889
B297	Aves	Passeriformes	Alaudidae	Calandrella	brachydactyla	0	Least Concern	1.30868e+07	2.82451e+06	21.5829
B298	Aves	Passeriformes	Alaudidae	Calandrella	rufescens	0	Least Concern	6.74533e+06	910803	13.5027
B299	Aves	Passeriformes	Alaudidae	Calandrella	cheleensis	0	Least Concern	5.89028e+06	205396	3.48704
B300	Aves	Passeriformes	Alaudidae	Chersophilus	duponti	0	Near Threatened	287838	91151.9	31.6678
B301	Aves	Passeriformes	Alaudidae	Galerida	cristata	0	Least Concern	2.85584e+07	5.66059e+06	19.8211
B507	Aves	Passeriformes	Alaudidae	Galerida	theklae	0	Least Concern	2.03808e+06	394455	19.3542
B302	Aves	Passeriformes	Alaudidae	Lullula	arborea	0	Least Concern	7.10435e+06	6.26347e+06	88.1639
B303	Aves	Passeriformes	Alaudidae	Alauda	arvensis	0	Least Concern	3.29976e+07	9.40529e+06	28.5029
B304	Aves	Passeriformes	Alaudidae	Eremophila	alpestris	0	Least Concern	3.32674e+07	1.32207e+06	3.97408
B305	Aves	Passeriformes	Hirundinidae	Riparia	riparia	0	Least Concern	3.65315e+07	8.48906e+06	23.2376
B306	Aves	Passeriformes	Hirundinidae	Hirundo	rupestris	0	Least Concern	9.10045e+06	1.86403e+06	20.4829
B307	Aves	Passeriformes	Hirundinidae	Hirundo	rustica	0	Least Concern	5.16942e+07	9.99131e+06	19.3277
B308	Aves	Passeriformes	Hirundinidae	Hirundo	daurica	0	Least Concern	1.9204e+07	996323	5.1881
B309	Aves	Passeriformes	Hirundinidae	Delichon	urbicum	0	Least Concern	2.6026e+07	9.82446e+06	37.7486
B310	Aves	Passeriformes	Motacillidae	Motacilla	alba	0	Least Concern	3.94492e+07	1.03549e+07	26.2487
B311	Aves	Passeriformes	Motacillidae	Motacilla	citreola	0	Least Concern	1.70583e+07	2.5241e+06	14.7969
B312	Aves	Passeriformes	Motacillidae	Motacilla	flava	0	Least Concern	2.8346e+07	8.65029e+06	30.5168
B313	Aves	Passeriformes	Motacillidae	Motacilla	cinerea	0	Least Concern	1.85359e+07	3.85561e+06	20.8008
B314	Aves	Passeriformes	Motacillidae	Anthus	campestris	0	Least Concern	1.11742e+07	4.4607e+06	39.9196
B315	Aves	Passeriformes	Motacillidae	Anthus	berthelotii	1	Least Concern	8396.51	8396.51	100
B316	Aves	Passeriformes	Motacillidae	Anthus	trivialis	0	Least Concern	1.46333e+07	7.88502e+06	53.884
B317	Aves	Passeriformes	Motacillidae	Anthus	hodgsoni	0	Least Concern	1.40987e+07	273598	1.94059
B318	Aves	Passeriformes	Motacillidae	Anthus	pratensis	0	Least Concern	6.42012e+06	6.11277e+06	95.2127
B319	Aves	Passeriformes	Motacillidae	Anthus	cervinus	0	Least Concern	3.77476e+06	544328	14.4202
B320	Aves	Passeriformes	Motacillidae	Anthus	petrosus	1	Least Concern	338857	338857	100
B321	Aves	Passeriformes	Motacillidae	Anthus	spinoletta	0	Least Concern	3.66935e+06	1.19735e+06	32.6312
B322	Aves	Passeriformes	Pycnonotidae	Pycnonotus	xanthopygos	0	Least Concern	1.03428e+06	45302.4	4.38007
B323	Aves	Passeriformes	Reguliidae	Regulus	regulus	0	Least Concern	1.31954e+07	6.19469e+06	46.9457
B324	Aves	Passeriformes	Reguliidae	Regulus	ignicapillus	1	Least Concern	2.5562e+06	2.5562e+06	100
B325	Aves	Passeriformes	Bombycillidae	Bombycilla	garrulus	0	Least Concern	1.2746e+07	1.70176e+06	13.3514
B326	Aves	Passeriformes	Cinclidae	Cinclus	cinclus	0	Least Concern	8.83588e+06	3.63703e+06	41.162
B327	Aves	Passeriformes	Troglodytidae	Troglodytes	troglodytes	0	Least Concern	2.18072e+07	7.47745e+06	34.2889
B328	Aves	Passeriformes	Prunellidae	Prunella	collaris	0	Least Concern	1.03311e+07	854863	8.27468
B329	Aves	Passeriformes	Prunellidae	Prunella	montanella	0	Least Concern	1340000	160968	12.0125
B330	Aves	Passeriformes	Prunellidae	Prunella	ocularis	0	Least Concern	208476	97002.5	46.5293
B331	Aves	Passeriformes	Prunellidae	Prunella	atrogularis	0	Least Concern	1.0685e+06	58744	5.49781
B332	Aves	Passeriformes	Prunellidae	Prunella	modularis	1	Least Concern	7.00772e+06	7.00772e+06	100
B333	Aves	Passeriformes	Muscicapidae	Monticola	saxatilis	0	Least Concern	8.71596e+06	1.73897e+06	19.9516
B334	Aves	Passeriformes	Muscicapidae	Monticola	solitarius	0	Least Concern	9.81134e+06	1.42314e+06	14.5051
B335	Aves	Passeriformes	Turdidae	Zoothera	dauma	0	Least Concern	7.19498e+06	240440	3.34177
B336	Aves	Passeriformes	Turdidae	Turdus	torquatus	0	Least Concern	1.63151e+06	1.54819e+06	94.8936
B337	Aves	Passeriformes	Turdidae	Turdus	merula	0	Least Concern	1.38763e+07	8.44551e+06	60.8627
B338	Aves	Passeriformes	Turdidae	Turdus	ruficollis	0	Least Concern	5.56694e+06	250437	4.49866
B339	Aves	Passeriformes	Turdidae	Turdus	pilaris	0	Least Concern	1.51935e+07	6.58019e+06	43.3093
B340	Aves	Passeriformes	Turdidae	Turdus	iliacus	0	Least Concern	1.19271e+07	5.21549e+06	43.728
B341	Aves	Passeriformes	Turdidae	Turdus	philomelos	0	Least Concern	1.37013e+07	8.40292e+06	61.3294
B342	Aves	Passeriformes	Turdidae	Turdus	viscivorus	0	Least Concern	1.35576e+07	7.60536e+06	56.0965
B343	Aves	Passeriformes	Cisticolidae	Cisticola	juncidis	0	Least Concern	1.81052e+07	1.0055e+06	5.55364
B344	Aves	Passeriformes	Cisticolidae	Prinia	gracilis	0	Least Concern	4.32418e+06	50353.7	1.16447
B345	Aves	Passeriformes	Sylviidae	Cettia	cetti	0	Least Concern	6.45911e+06	2.50858e+06	38.8379
B346	Aves	Passeriformes	Sylviidae	Locustella	lanceolata	0	Least Concern	1.07475e+07	335483	3.12149
B347	Aves	Passeriformes	Sylviidae	Locustella	naevia	0	Least Concern	9.5417e+06	5.70801e+06	59.8217
B348	Aves	Passeriformes	Sylviidae	Locustella	fluviatilis	0	Least Concern	5.71097e+06	4.55507e+06	79.7599
B349	Aves	Passeriformes	Sylviidae	Locustella	luscinioides	0	Least Concern	4.69558e+06	3.24088e+06	69.0199
B350	Aves	Passeriformes	Sylviidae	Acrocephalus	melanopogon	0	Least Concern	2.13008e+06	729537	34.2493
B351	Aves	Passeriformes	Sylviidae	Acrocephalus	paludicola	0	Vulnerable	2.58544e+06	1.21488e+06	46.9893
B352	Aves	Passeriformes	Sylviidae	Acrocephalus	schoenobaenus	0	Least Concern	1.19412e+07	7.24474e+06	60.6703
B353	Aves	Passeriformes	Sylviidae	Acrocephalus	agricola	0	Least Concern	9.18121e+06	593940	6.46908
B354	Aves	Passeriformes	Sylviidae	Acrocephalus	scirpaceus	0	Least Concern	1.50753e+07	5.17469e+06	34.3257
B355	Aves	Passeriformes	Sylviidae	Acrocephalus	dumetorum	0	Least Concern	1.07604e+07	2.62496e+06	24.3946
B356	Aves	Passeriformes	Sylviidae	Acrocephalus	palustris	0	Least Concern	5.99056e+06	5.88104e+06	98.1718
B357	Aves	Passeriformes	Sylviidae	Acrocephalus	arundinaceus	0	Least Concern	1.77116e+07	5.36541e+06	30.2931
B358	Aves	Passeriformes	Sylviidae	Hippolais	caligata	0	Least Concern	8.6798e+06	1.91843e+06	22.1022
B359	Aves	Passeriformes	Sylviidae	Hippolais	pallida	0	Least Concern	5.57977e+06	1.56742e+06	28.0912
B360	Aves	Passeriformes	Sylviidae	Hippolais	languida	0	Least Concern	3.09891e+06	79522.6	2.56615
B361	Aves	Passeriformes	Sylviidae	Hippolais	olivetorum	0	Least Concern	309576	301041	97.243
B362	Aves	Passeriformes	Sylviidae	Hippolais	polyglotta	0	Least Concern	1.71224e+06	1.31972e+06	77.0757
B363	Aves	Passeriformes	Sylviidae	Hippolais	icterina	0	Least Concern	6.26122e+06	5.63723e+06	90.0341
B364	Aves	Passeriformes	Sylviidae	Phylloscopus	trochilus	0	Least Concern	1.57992e+07	7.17099e+06	45.3884
B365	Aves	Passeriformes	Sylviidae	Phylloscopus	bonelli	0	Least Concern	8.74438e+06	8.42535e+06	96.3517
B366	Aves	Passeriformes	Sylviidae	Phylloscopus	sindianus	0	Least Concern	924784	164720	17.8117
B367	Aves	Passeriformes	Sylviidae	Phylloscopus	orientalis	0	Least Concern	2.23255e+06	1.3622e+06	61.0156
B368	Aves	Passeriformes	Sylviidae	Phylloscopus	sibilatrix	0	Least Concern	7.52133e+06	6.44059e+06	85.631
B369	Aves	Passeriformes	Sylviidae	Phylloscopus	inornatus	0	Least Concern	1.0987e+07	379852	3.45728
B370	Aves	Passeriformes	Sylviidae	Phylloscopus	borealis	0	Least Concern	1.59629e+07	2.19433e+06	13.7464
B371	Aves	Passeriformes	Sylviidae	Phylloscopus	trochiloides	0	Least Concern	1.24743e+07	3.38401e+06	27.1279
B372	Aves	Passeriformes	Sylviidae	Sylvia	atricapilla	0	Least Concern	1.00931e+07	8.0745e+06	80.0006
B373	Aves	Passeriformes	Sylviidae	Sylvia	borin	0	Least Concern	9.62818e+06	7.58255e+06	78.7538
B374	Aves	Passeriformes	Sylviidae	Sylvia	communis	0	Least Concern	1.41022e+07	8.78901e+06	62.3238
B375	Aves	Passeriformes	Sylviidae	Sylvia	curruca	0	Least Concern	1.66281e+07	7.8402e+06	47.1504
B376	Aves	Passeriformes	Sylviidae	Sylvia	nisoria	0	Least Concern	2.02364e+07	4.44387e+06	21.9598
B377	Aves	Passeriformes	Sylviidae	Sylvia	hortensis	0	Least Concern	2.90931e+06	1.05016e+06	36.0965
B378	Aves	Passeriformes	Sylviidae	Sylvia	rueppelli	1	Least Concern	210278	210278	100
B379	Aves	Passeriformes	Sylviidae	Sylvia	cantillans	0	Least Concern	1.49785e+06	1.00491e+06	67.0904
B380	Aves	Passeriformes	Sylviidae	Sylvia	melanocephala	0	Least Concern	1.92559e+06	1.1704e+06	60.7812
B381	Aves	Passeriformes	Sylviidae	Sylvia	melanothorax	1	Least Concern	7272.36	7272.36	100
B382	Aves	Passeriformes	Sylviidae	Sylvia	mystacea	0	Least Concern	1.58981e+06	225839	14.2054
B383	Aves	Passeriformes	Sylviidae	Sylvia	conspicillata	0	Least Concern	1.23108e+06	458561	37.2486
B384	Aves	Passeriformes	Sylviidae	Sylvia	undata	0	Near Threatened	835681	807463	96.6234
B385	Aves	Passeriformes	Sylviidae	Sylvia	sarda	1	Least Concern	37366.8	37366.8	100
B386	Aves	Passeriformes	Muscicapidae	Muscicapa	striata	0	Least Concern	1.67249e+07	8.92455e+06	53.3608
B387	Aves	Passeriformes	Muscicapidae	Ficedula	hypoleuca	0	Least Concern	7.69234e+06	6.23248e+06	81.0218
B388	Aves	Passeriformes	Muscicapidae	Ficedula	albicollis	0	Least Concern	2.4653e+06	2.11532e+06	85.8037
B389	Aves	Passeriformes	Muscicapidae	Ficedula	semitorquata	0	Near Threatened	856291	384093	44.8554
B390	Aves	Passeriformes	Muscicapidae	Ficedula	parva	0	Least Concern	5.9838e+06	4.83867e+06	80.8628
B391	Aves	Passeriformes	Muscicapidae	Erithacus	rubecula	0	Least Concern	1.01876e+07	8.84428e+06	86.8139
B392	Aves	Passeriformes	Muscicapidae	Luscinia	luscinia	0	Least Concern	6.87379e+06	4.58015e+06	66.6322
B393	Aves	Passeriformes	Muscicapidae	Luscinia	megarhynchos	0	Least Concern	7.58967e+06	3.71031e+06	48.8863
B394	Aves	Passeriformes	Muscicapidae	Luscinia	calliope	0	Least Concern	1.08137e+07	89578.4	0.828376
B395	Aves	Passeriformes	Muscicapidae	Luscinia	svecica	0	Least Concern	2.01233e+07	5.45999e+06	27.1327
B396	Aves	Passeriformes	Muscicapidae	Tarsiger	cyanurus	0	Least Concern	1.22489e+07	331089	2.70301
B397	Aves	Passeriformes	Muscicapidae	Irania	gutturalis	0	Least Concern	1.37713e+06	294347	21.3739
B398	Aves	Passeriformes	Muscicapidae	Erythropygia	galactotes	0	Least Concern	6.14837e+06	634850	10.3255
B399	Aves	Passeriformes	Muscicapidae	Phoenicurus	ochruros	0	Least Concern	1.36352e+07	4.91263e+06	36.029
B400	Aves	Passeriformes	Muscicapidae	Phoenicurus	phoenicurus	0	Least Concern	1.37597e+07	8.34131e+06	60.6214
B401	Aves	Passeriformes	Muscicapidae	Saxicola	rubetra	0	Least Concern	1.02372e+07	8.00439e+06	78.189
B402	Aves	Passeriformes	Muscicapidae	Saxicola	torquata	0	Least Concern	3.26709e+07	5.21285e+06	15.9556
B403	Aves	Passeriformes	Muscicapidae	Oenanthe	leucura	0	Least Concern	1.31416e+06	300343	22.8544
B404	Aves	Passeriformes	Muscicapidae	Oenanthe	oenanthe	0	Least Concern	3.12133e+07	9.84901e+06	31.5539
B405	Aves	Passeriformes	Muscicapidae	Oenanthe	finschii	0	Least Concern	2.23595e+06	531025	23.7494
B406	Aves	Passeriformes	Muscicapidae	Oenanthe	pleschanka	0	Least Concern	8.8475e+06	1.10213e+06	12.4569
B407	Aves	Passeriformes	Muscicapidae	Oenanthe	hispanica	0	Least Concern	3.53554e+06	1.87465e+06	53.0229
B408	Aves	Passeriformes	Muscicapidae	Oenanthe	chrysopygia	0	Least Concern	482496	46400.8	9.61681
B409	Aves	Passeriformes	Muscicapidae	Oenanthe	deserti	0	Least Concern	9.34581e+06	7225.01	0.0773075
B410	Aves	Passeriformes	Muscicapidae	Oenanthe	cypriaca	1	Least Concern	9318.63	9318.63	100
B411	Aves	Passeriformes	Muscicapidae	Oenanthe	isabellina	0	Least Concern	1.17177e+07	1.46594e+06	12.5105
B412	Aves	Passeriformes	Timaliidae	Panurus	biarmicus	0	Least Concern	1.08184e+07	1.45163e+06	13.4181
B413	Aves	Passeriformes	Aegithalidae	Aegithalos	caudatus	0	Least Concern	1.85807e+07	7.7822e+06	41.8832
B414	Aves	Passeriformes	Paridae	Parus	lugubris	0	Least Concern	1.31217e+06	797606	60.7854
B415	Aves	Passeriformes	Paridae	Parus	palustris	0	Least Concern	9.03639e+06	4.65353e+06	51.4977
B416	Aves	Passeriformes	Paridae	Parus	montanus	0	Least Concern	2.17631e+07	6.56466e+06	30.1642
B417	Aves	Passeriformes	Paridae	Parus	cinctus	0	Least Concern	1.07237e+07	1.45906e+06	13.606
B418	Aves	Passeriformes	Paridae	Parus	ater	0	Least Concern	1.86966e+07	6.77379e+06	36.2301
B419	Aves	Passeriformes	Paridae	Parus	cristatus	1	Least Concern	5.91884e+06	5.91884e+06	100
B420	Aves	Passeriformes	Paridae	Parus	major	0	Least Concern	3.25908e+07	9.77485e+06	29.9926
B421	Aves	Passeriformes	Paridae	Parus	caeruleus	0	Least Concern	9.60711e+06	8.3466e+06	86.8793
B422	Aves	Passeriformes	Paridae	Parus	cyanus	0	Least Concern	9.28889e+06	956161	10.2936
B423	Aves	Passeriformes	Sittidae	Sitta	europaea	0	Least Concern	2.32779e+07	7.3638e+06	31.6343
B424	Aves	Passeriformes	Sittidae	Sitta	whiteheadi	1	Vulnerable	3947.69	3947.69	100
B425	Aves	Passeriformes	Sittidae	Sitta	krueperi	1	Near Threatened	247694	247694	100
B426	Aves	Passeriformes	Sittidae	Sitta	neumayer	0	Least Concern	1.24948e+06	797039	63.7895
B427	Aves	Passeriformes	Sittidae	Sitta	tephronota	0	Least Concern	2.45813e+06	72684.1	2.95688
B428	Aves	Passeriformes	Sittidae	Tichodroma	muraria	0	Least Concern	5.61244e+06	675289	12.032
B429	Aves	Passeriformes	Certhidae	Certhia	familiaris	0	Least Concern	2.04385e+07	6.87147e+06	33.6202
B430	Aves	Passeriformes	Certhidae	Certhia	brachydactyla	0	Least Concern	3.19998e+06	2.94681e+06	92.0883
B431	Aves	Passeriformes	Remizidae	Remiz	pendulinus	0	Least Concern	5.88639e+06	4.23685e+06	71.977
B432	Aves	Passeriformes	Oriolidae	Oriolus	oriolus	0	Least Concern	1.52669e+07	7.38611e+06	48.3801
B433	Aves	Passeriformes	Lanidae	Lanius	collurio	0	Least Concern	1.30991e+07	8.1039e+06	61.8659
B434	Aves	Passeriformes	Lanidae	Lanius	excubitor	0	Least Concern	3.62186e+07	5.69822e+06	15.7328
B435	Aves	Passeriformes	Lanidae	Lanius	meridionalis	0	Not Evaluated	NO DATA ON GLOBAL EOO	603243	NO DATA ON GLOBAL EOO
B436	Aves	Passeriformes	Lanidae	Lanius	minor	0	Least Concern	8.40702e+06	3.32523e+06	39.553
B437	Aves	Passeriformes	Lanidae	Lanius	nubicus	0	Least Concern	353239	345745	97.8784
B438	Aves	Passeriformes	Lanidae	Lanius	senator	0	Least Concern	2.57929e+06	1.92491e+06	74.6296
B439	Aves	Passeriformes	Corvidae	Perisoreus	infaustus	0	Least Concern	1.08182e+07	2.80021e+06	25.8843
B440	Aves	Passeriformes	Corvidae	Garrulus	glandarius	0	Least Concern	2.18243e+07	9.20028e+06	42.1562
B441	Aves	Passeriformes	Corvidae	Cyanopica	cyanus	0	Least Concern	5.10233e+06	265042	5.19452
B442	Aves	Passeriformes	Corvidae	Pica	pica	0	Least Concern	3.20639e+07	1.02127e+07	31.8512
B443	Aves	Passeriformes	Corvidae	Nucifraga	caryocatactes	0	Least Concern	1.78134e+07	3.23447e+06	18.1575
B444	Aves	Passeriformes	Corvidae	Pyrrhocorax	pyrrhocorax	0	Least Concern	1.33625e+07	970346	7.2617
B445	Aves	Passeriformes	Corvidae	Pyrrhocorax	graculus	0	Least Concern	3.55042e+06	684943	19.2919
B446	Aves	Passeriformes	Corvidae	Corvus	monedula	0	Least Concern	1.55615e+07	9.12201e+06	58.6192
B447	Aves	Passeriformes	Corvidae	Corvus	frugilegus	0	Least Concern	1.89375e+07	6.29587e+06	33.2455
B448	Aves	Passeriformes	Corvidae	Corvus	corone	0	Least Concern	3.30047e+07	1.03382e+07	31.3235
B449	Aves	Passeriformes	Corvidae	Corvus	corax	0	Least Concern	5.22186e+07	9.28179e+06	17.7749
B450	Aves	Passeriformes	Sturnidae	Sturnus	roseus	0	Least Concern	5.90813e+06	1.2965e+06	21.9444
B451	Aves	Passeriformes	Sturnidae	Sturnus	vulgaris	0	Least Concern	1.71961e+07	9.15638e+06	53.2469
B452	Aves	Passeriformes	Sturnidae	Sturnus	unicolor	0	Least Concern	827658	652510	78.8381
B453	Aves	Passeriformes	Emberizidae	Emberiza	citrinella	0	Least Concern	1.28651e+07	7.77561e+06	60.4398
B454	Aves	Passeriformes	Emberizidae	Emberiza	leucocephalos	0	Least Concern	8.56491e+06	225545	2.63336
B455	Aves	Passeriformes	Emberizidae	Emberiza	cirlus	0	Least Concern	2.17545e+06	1.95162e+06	89.7111
B456	Aves	Passeriformes	Emberizidae	Emberiza	cia	0	Least Concern	3.87295e+06	1.86079e+06	48.0459
B457	Aves	Passeriformes	Emberizidae	Emberiza	buchanani	0	Least Concern	1.88654e+06	34767	1.8429
B458	Aves	Passeriformes	Emberizidae	Emberiza	cineracea	0	Near Threatened	83143.4	70839.3	85.2014
B459	Aves	Passeriformes	Emberizidae	Emberiza	hortulana	0	Least Concern	8.05231e+06	6.75415e+06	83.8785
B460	Aves	Passeriformes	Emberizidae	Emberiza	caesia	0	Least Concern	398888	347148	87.029
B461	Aves	Passeriformes	Emberizidae	Emberiza	pusilla	0	Least Concern	8.32275e+06	1.6128e+06	19.3783
B462	Aves	Passeriformes	Emberizidae	Emberiza	rustica	0	Least Concern	1.10492e+07	2.18036e+06	19.7331
B463	Aves	Passeriformes	Emberizidae	Emberiza	aureola	0	Vulnerable	3.11944e+07	2.87854e+06	9.22776
B464	Aves	Passeriformes	Emberizidae	Emberiza	melanocephala	0	Least Concern	2.12552e+06	1.40624e+06	66.16
B465	Aves	Passeriformes	Emberizidae	Emberiza	bruniceps	0	Least Concern	1.99878e+06	76916.5	3.84816
B466	Aves	Passeriformes	Emberizidae	Emberiza	pallasi	0	Least Concern	5.66367e+06	35714.1	0.630582
B467	Aves	Passeriformes	Emberizidae	Emberiza	schoeniclus	0	Least Concern	2.37911e+07	8.42176e+06	35.3988
B468	Aves	Passeriformes	Emberizidae	Miliaria	calandra	0	Least Concern	6.72046e+06	5.38717e+06	80.1607
B469	Aves	Passeriformes	Emberizidae	Calcarius	lapponicus	0	Least Concern	8.2591e+06	799913	9.68523
B470	Aves	Passeriformes	Emberizidae	Plectrophenax	nivalis	0	Least Concern	6.79645e+06	805838	11.8568
B471	Aves	Passeriformes	Fringillidae	Fringilla	coelebs	0	Least Concern	1.34007e+07	9.6349e+06	71.8983
B472	Aves	Passeriformes	Fringillidae	Fringilla	montifringilla	0	Least Concern	1.36159e+07	3.30018e+06	24.2377
B473	Aves	Passeriformes	Fringillidae	Pinicola	enucleator	0	Least Concern	1.89489e+07	1.01116e+06	5.33622
B474	Aves	Passeriformes	Fringillidae	Carpodacus	erythrinus	0	Least Concern	2.35214e+07	5.60644e+06	23.8355
B475	Aves	Passeriformes	Fringillidae	Carpodacus	rubicilla	0	Least Concern	3.21843e+06	41376.2	1.2856
B476	Aves	Passeriformes	Fringillidae	Loxia	pytyopsittacus	1	Least Concern	3.22245e+06	3.22245e+06	100
B477	Aves	Passeriformes	Fringillidae	Loxia	scotica	1	Data Deficient	16130.3	16130.3	100
B478	Aves	Passeriformes	Fringillidae	Loxia	curvirostra	0	Least Concern	2.44135e+07	5.68425e+06	23.2832
B479	Aves	Passeriformes	Fringillidae	Loxia	leucoptera	0	Least Concern	1.56722e+07	1.64547e+06	10.4992
B480	Aves	Passeriformes	Fringillidae	Carduelis	chloris	0	Least Concern	9.70039e+06	8.96103e+06	92.378
B481	Aves	Passeriformes	Fringillidae	Carduelis	flammea	0	Least Concern	1.86345e+07	3.34846e+06	17.9691
B482	Aves	Passeriformes	Fringillidae	Carduelis	hornemanni	0	Not Evaluated	2.46705e+06	436468	17.6919
B483	Aves	Passeriformes	Fringillidae	Carduelis	spinus	0	Least Concern	8.95124e+06	5.59423e+06	62.4967
B484	Aves	Passeriformes	Fringillidae	Carduelis	carduelis	0	Least Concern	1.57851e+07	8.54584e+06	54.1386
B485	Aves	Passeriformes	Fringillidae	Carduelis	flavirostris	0	Least Concern	7.43321e+06	609425	8.19869
B486	Aves	Passeriformes	Fringillidae	Carduelis	cannabina	0	Least Concern	1.22042e+07	8.45522e+06	69.2814
B487	Aves	Passeriformes	Fringillidae	Serinus	pusillus	0	Least Concern	2.0419e+06	250320	12.2592
B488	Aves	Passeriformes	Fringillidae	Serinus	serinus	0	Least Concern	4.51355e+06	4.246e+06	94.0722
B489	Aves	Passeriformes	Fringillidae	Serinus	canaria	1	Least Concern	10784.9	10784.9	100
B490	Aves	Passeriformes	Fringillidae	Serinus	citrinella	1	Least Concern	353023	353023	100
B491	Aves	Passeriformes	Fringillidae	Pyrrhula	pyrrhula	0	Least Concern	1.79647e+07	6.75869e+06	37.6222
B492	Aves	Passeriformes	Fringillidae	Pyrrhula	murina	1	Endangered	754.807	754.807	100
B493	Aves	Passeriformes	Fringillidae	Coccothraustes	coccothraustes	0	Least Concern	1.26715e+07	6.80997e+06	53.7425
B494	Aves	Passeriformes	Fringillidae	Rhodopechys	sanguinea	0	Least Concern	1.78957e+06	186397	10.4157
B495	Aves	Passeriformes	Fringillidae	Bucanetes	githagineus	0	Least Concern	6.84007e+06	33116.2	0.48415
B496	Aves	Passeriformes	Fringillidae	Eremopsaltria	mongolicus	0	Least Concern	4.51864e+06	17269.6	0.382187
B497	Aves	Passeriformes	Fringillidae	Rhodopechys	obsoletus	0	Least Concern	4.30857e+06	22239	0.516158
B498	Aves	Passeriformes	Passeridae	Passer	italiae	1	Not Evaluated	336420	336420	100
B499	Aves	Passeriformes	Passeridae	Passer	domesticus	0	Least Concern	34800000	9.99864e+06	28.7317
B500	Aves	Passeriformes	Passeridae	Passer	hispaniolensis	0	Least Concern	5.02056e+06	1.0994e+06	21.8979
B501	Aves	Passeriformes	Passeridae	Passer	moabiticus	0	Least Concern	188129	18560.1	9.86562
B502	Aves	Passeriformes	Passeridae	Passer	montanus	0	Least Concern	3.89945e+07	8.88053e+06	22.7738
B503	Aves	Passeriformes	Passeridae	Petronia	xanthocollis	0	Least Concern	5.05224e+06	9101.2	0.180142
B504	Aves	Passeriformes	Passeridae	Petronia	petronia	0	Least Concern	9.0073e+06	1.54517e+06	17.1546
B505	Aves	Passeriformes	Passeridae	Petronia	brachydactyla	0	Least Concern	1.88032e+06	51472.2	2.73741
B506	Aves	Passeriformes	Passeridae	Montifringilla	nivalis	0	Least Concern	5.60599e+06	481574	8.59034
B508	Aves	Columbiformes	Columbidae	Columba	bollii	1	Least Concern	3429.75	3429.75	100
B509	Aves	Columbiformes	Columbidae	Columba	junoniae	1	Near Threatened	1309.2	1309.2	100
B510	Aves	Passeriformes	Fringillidae	Fringilla	teydea	1	Near Threatened	510.538	510.538	100
B513	Aves	Passeriformes	Muscicapidae	Saxicola	dacotiae	1	Near Threatened	1533.93	1533.93	100
B514	Aves	Charadriformes	Charadridae	Vanellus	gregarius	0	Critically Endangered	1.49783e+06	407044	27.1756
